# Supplementary material for: Polyanionic cyano-fullerides for CO2 capture: a DFT prediction
Source: Royal Society of Chemistry journal article supplement (doi:10.1039/d2cp03464f), 2022-01-01
Supplement: d2cp03464f1.pdf [file d2cp03464f1.pdf]

# Polyanionic Cyano-fullerides for CO<sub>2</sub> Capture: A DFT Prediction

Sebastian Anila,<sup>1,2</sup> and Cherumuttathu H. Suresh,<sup>1,2, \*</sup>

<sup>1</sup>Chemical Sciences and Technology Division, CSIR– National Institute for Interdisciplinary Science and Technology, Thiruvananthapuram, Kerala, 695 019, India

<sup>2</sup>Academy of Scientific & Innovative Research (AcSIR), Ghaziabad, - 201002, India

## Supporting Information

### Table of Contents

| Sl. No. | Title                                                                                                                                                                                                                                                                                                                                                       | Page No. |
|---------|-------------------------------------------------------------------------------------------------------------------------------------------------------------------------------------------------------------------------------------------------------------------------------------------------------------------------------------------------------------|----------|
| 1.      | <b>Table S1.</b> The sp <sup>2</sup> —sp <sup>2</sup> C—C and sp <sup>3</sup> —sp <sup>2</sup> C—C bond lengths of the carbon cage in Å at M06L/6-31G(d,p) level.                                                                                                                                                                                           | S2       |
| 2       | <b>Table S2.</b> The energetics (kcal/mol) of the imidazolium cation-polyanionic fulleride complexes in the solvent DCM at M06L/6-311++G(d,p)//M06L/6-31G(d,p) level.                                                                                                                                                                                       | S2       |
| 3       | <b>Table S3.</b> The minimum MESP values of (C <sub>60</sub> (CN) <sub>n</sub> ) <sup>n-</sup> at M06L/6-311++G(d,p)//M06L/6-31G(d,p) level. All the values are in kcal/mol.                                                                                                                                                                                | S3       |
| 4       | <b>Fig. S1</b> The Schlegel diagram indicating the position of CN units.                                                                                                                                                                                                                                                                                    | S3       |
| 5       | <b>Fig. S2</b> The spin density distribution over C <sub>60</sub> <sup>+</sup> at M06L/6-311++G(d,p)//M06L/6-31G(d,p) level (isosurface value = 0.001 au).                                                                                                                                                                                                  | S4       |
| 6       | <b>Fig. S3</b> MESP surfaces of (C <sub>60</sub> (CN) <sub>n</sub> ) <sup>n-</sup> for n = 1 to 6, that engulfs the whole anion at M06L/6-311++G(d,p)//M06L/6-31G(d,p) level. The minimum value of MESP that engulfs the whole anion in kcal/mol is also depicted.                                                                                          | S4       |
| 7       | <b>Fig. S4</b> HOMO plots of (C <sub>60</sub> (CN) <sub>n</sub> ) <sup>n-</sup> for n = 1 to 6 at M06L/6-311++G(d,p)//M06L/6-31G(d,p) level (isosurface value = 0.02 au).                                                                                                                                                                                   | S5       |
| 8       | <b>Fig. S5</b> The optimized geometry of ((C <sub>60</sub> (CN) <sub>n</sub> ) <sup>n-</sup> )—(CO <sub>2</sub> ) at M06L/6-31G(d,p) level. The distances are given in Å.                                                                                                                                                                                   | S5       |
| 9       | <b>Table S4.</b> Energetics of CO <sub>2</sub> complexes of ((C <sub>60</sub> (CN) <sub>n</sub> ) <sup>n-</sup> ) fullerides in kcal/mol.                                                                                                                                                                                                                   | S6       |
| 10      | <b>Fig.S6</b> The optimized geometries of [(IM <sup>+</sup> ) <sub>6</sub> ...((C <sub>60</sub> (CN) <sub>6</sub> ) <sup>6-</sup> )]—(CO <sub>2</sub> ) <sub>2</sub> and [(IM <sup>+</sup> ) <sub>6</sub> ...((C <sub>60</sub> (CN) <sub>6</sub> ) <sup>6-</sup> )]—(CO <sub>2</sub> ) <sub>4</sub> at M06L/6-31G(d,p) level. The distances are given in Å. | S6       |
| 11      | <b>Table S5.</b> BSSE values of [(IM <sup>+</sup> ) <sub>n</sub> ...((C <sub>60</sub> (CN) <sub>n</sub> ) <sup>n-</sup> )] complexes at M06L/6-311++G(d,p).                                                                                                                                                                                                 | S7       |
| 12      | <b>Table S6.</b> Energetics (kcal/mol) of CO <sub>2</sub> complexes of [(IM <sup>+</sup> ) <sub>n</sub> ...((C <sub>60</sub> (CN) <sub>n</sub> ) <sup>n-</sup> )] in the solvent DCM at M06L/SMD/6-311++G(d,p)//M06L/6-311++G(d,p) level.                                                                                                                   | S7       |
| 13      | <b>Table S7.</b> Relative energy (kcal/mol) of the reaction intermediates of [(IM <sup>+</sup> )...((C <sub>60</sub> (CN)) <sup>-</sup> )] formation in the solvent DCM at M06L/SMD/6-311++G(d,p)//M06L/6-311++G(d,p) level.                                                                                                                                | S8       |
| 14      | Cartesian coordinates of optimized geometry of (IM <sup>+</sup> ) <sub>n</sub> ...((C <sub>60</sub> (CN) <sub>n</sub> ) <sup>n-</sup> ) for n = 1 to 6 at M06L/6-31G(d,p) level. Atomic number followed by X, Y, Z coordinates in Å.                                                                                                                        | S8       |
| 15      | Cartesian coordinates of optimized geometry of dimers of (IM <sup>+</sup> ) <sub>n</sub> ...((C <sub>60</sub> (CN) <sub>n</sub> ) <sup>n-</sup> ) for n = 1 to 3 at M06L/6-31G(d,p) level. Atomic number followed by X, Y, Z coordinates in Å.                                                                                                              | S16      |
| 16      | Cartesian coordinates of optimized geometry of (C <sub>60</sub> (CN) <sub>n</sub> ) <sup>n-</sup> for n = 1 to 6 at M06L/6-31G(d,p) level. Atomic number followed by X, Y, Z coordinates in Å.                                                                                                                                                              | S23      |
| 17      | Cartesian coordinates of optimized geometry of CO <sub>2</sub> complexes of [(IM <sup>+</sup> ) <sub>n</sub> ...((C <sub>60</sub> (CN) <sub>n</sub> ) <sup>n-</sup> )] for n = 1 to 6 at M06L/6-31G(d,p) level. Atomic number followed by X, Y, Z coordinates in Å.                                                                                         | S27      |
| 18      | Cartesian coordinates of optimized geometry of CO <sub>2</sub> complexes of (C <sub>60</sub> (CN) <sub>n</sub> ) <sup>n-</sup> for n = 1 to 6 at M06L/6-31G(d,p) level. Atomic number followed by X, Y, Z coordinates in Å.                                                                                                                                 | S43      |

**Table S1.** The  $sp^2-sp^2$  C—C and  $sp^3-sp^2$  C—C bond lengths of the carbon cage in Å at M06L/6-31G(d,p) level.

| System                             | $sp^3-sp^2$ C—C | $sp^2-sp^2$ C—C |
|------------------------------------|-----------------|-----------------|
| $(C_{60}(CN))^-$                   | 1.54            | 1.43            |
| $(C_{60}(CN)_2)^{2-}$              | 1.54            | 1.43            |
| $(C_{60}(CN)_3)^{3-}$              | 1.54            | 1.43            |
| $(C_{60}(CN)_4)^{4-}$              | 1.54            | 1.43            |
| $(C_{60}(CN)_5)^{5-}$              | 1.54            | 1.43            |
| $(C_{60}(CN)_6)^{6-}$              | 1.55            | 1.43            |
| $IM^+...((C_{60}(CN))^-)$          | 1.54            | 1.43            |
| $(IM^+)_2...((C_{60}(CN)_2)^{2-})$ | 1.54            | 1.43            |
| $(IM^+)_3...((C_{60}(CN)_3)^{3-})$ | 1.54            | 1.43            |
| $(IM^+)_4...((C_{60}(CN)_4)^{4-})$ | 1.54            | 1.43            |
| $(IM^+)_5...((C_{60}(CN)_5)^{5-})$ | 1.54            | 1.43            |
| $(IM^+)_6...((C_{60}(CN)_6)^{6-})$ | 1.54            | 1.43            |

**Table S2.** The energetics (kcal/mol) of the imidazolium cation-polyanionic fulleride complexes in the solvent DCM at M06L/6-311++G(d,p)//M06L/6-31G(d,p) level.

| System                                 | $E_b'$ | $G_b'$ | $E_b'/IM$ | $G_b'/IM$ |
|----------------------------------------|--------|--------|-----------|-----------|
| $IM^+...((C_{60}(CN))^-)$              | -62.4  | -49.9  | -62.4     | -49.9     |
| $(IM^+)_2...((C_{60}(CN)_2)^{2-})$     | -129.4 | -103.5 | -64.7     | -51.7     |
| $(IM^+)_3...((C_{60}(CN)_3)^{3-})$     | -201.9 | -163.5 | -67.3     | -54.5     |
| $(IM^+)_4...((C_{60}(CN)_4)^{4-})$     | -279.3 | -227.0 | -69.8     | -56.8     |
| $(IM^+)_5...((C_{60}(CN)_5)^{5-})$     | -367.4 | -300.7 | -73.5     | -60.1     |
| $(IM^+)_6...((C_{60}(CN)_6)^{6-})$     | -458.5 | -377.8 | -76.4     | -63.0     |
| $[IM^+...((C_{60}(CN))^-)]_2$          | -131.3 | -92.5  | -65.6     | -46.2     |
| $[(IM^+)_2...((C_{60}(CN)_2)^{2-})]_2$ | -264.9 | -199.3 | -132.5    | -99.7     |
| $[(IM^+)_3...((C_{60}(CN)_3)^{3-})]_2$ | -414.5 | -319.5 | -138.2    | -106.5    |

**Table S3.** The minimum MESP of  $(C_{60}(CN)_n)^{n-}$  at M06L/6-311++G(d,p)//M06L/6-31G(d,p) level. All the values are in kcal/mol.

| System                | $V_{\min\text{-on}}$ | $V_{\min\text{-CN}}$ | $V_{\min\text{-in}}$ | $V_{\max}$ |
|-----------------------|----------------------|----------------------|----------------------|------------|
| $(C_{60}(CN))^-$      | -73.8                | -104.7               | -61.1                | -50.3      |
| $(C_{60}(CN)_2)^{2-}$ | -128.5               | -147.7               | -115.1               | -103.9     |
| $(C_{60}(CN)_3)^{3-}$ | -183.7               | -193.3               | -175.5               | -158.1     |
| $(C_{60}(CN)_4)^{4-}$ | -241.7               | -240.3               | -235.3               | -210.7     |
| $(C_{60}(CN)_5)^{5-}$ | -298.4               | -284.5               | -296.2               | -257.0     |
| $(C_{60}(CN)_6)^{6-}$ | -347.5               | -327.9               | -349.5               | -308.9     |

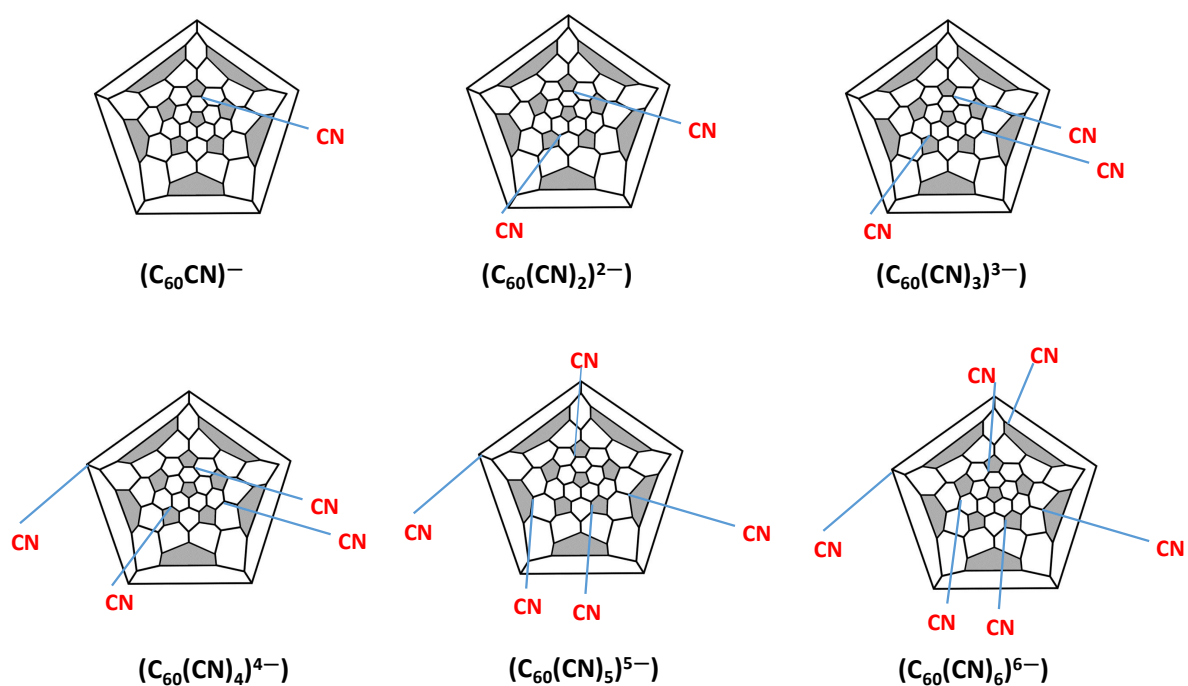

**Fig. S1** The Schlegel diagram indicating the position of CN units.

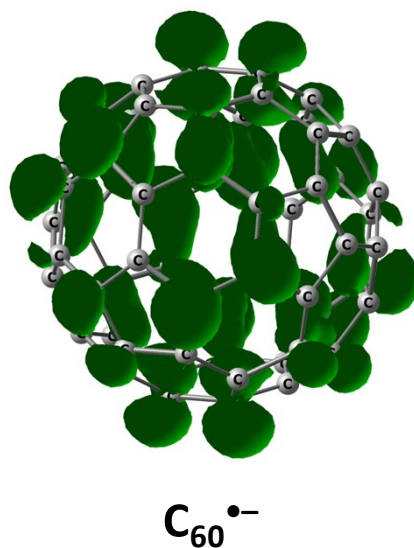

**Fig.S2** The spin density distribution over  $C_{60}^{\bullet-}$  at M06L/6-311++G(d,p)//M06L/6-31G(d,p) level (isosurface value = 0.001 au).

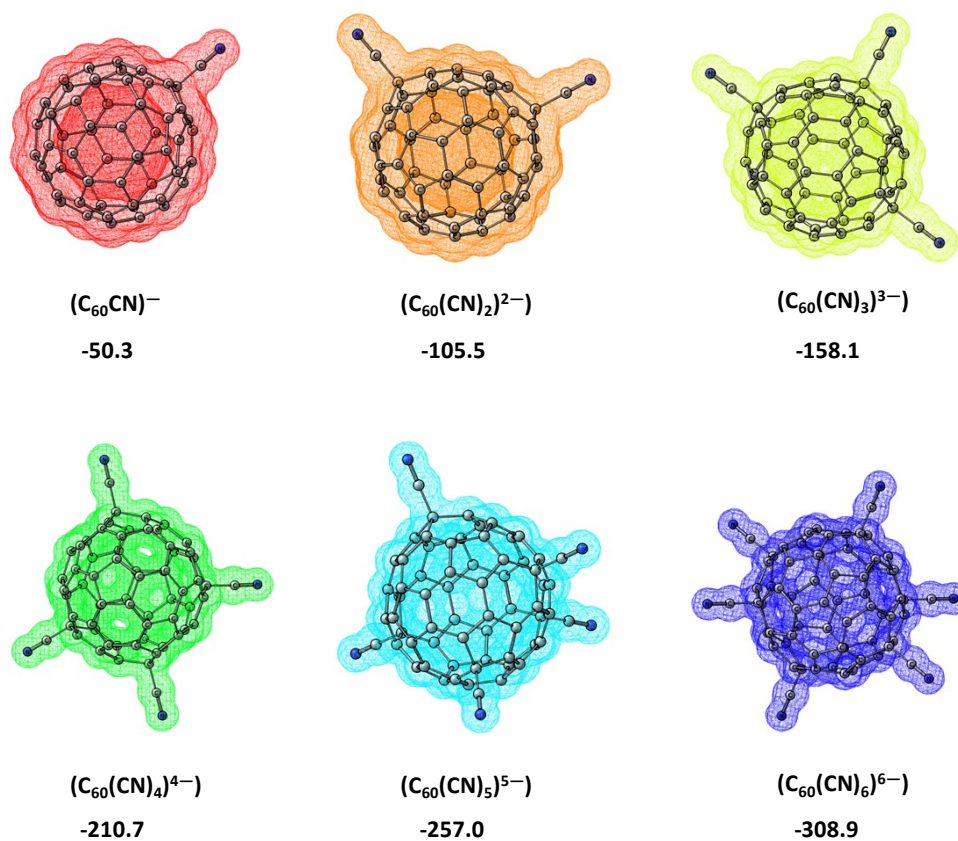

**Fig. S3** MESP surfaces of  $(C_{60}(CN)_n)^{n-}$  for  $n = 1$  to  $6$ , that engulfs the whole anion at M06L/6-311++G(d,p)//M06L/6-31G(d,p) level. The minimum value of MESP that engulfs the whole anion in kcal/mol is also depicted.

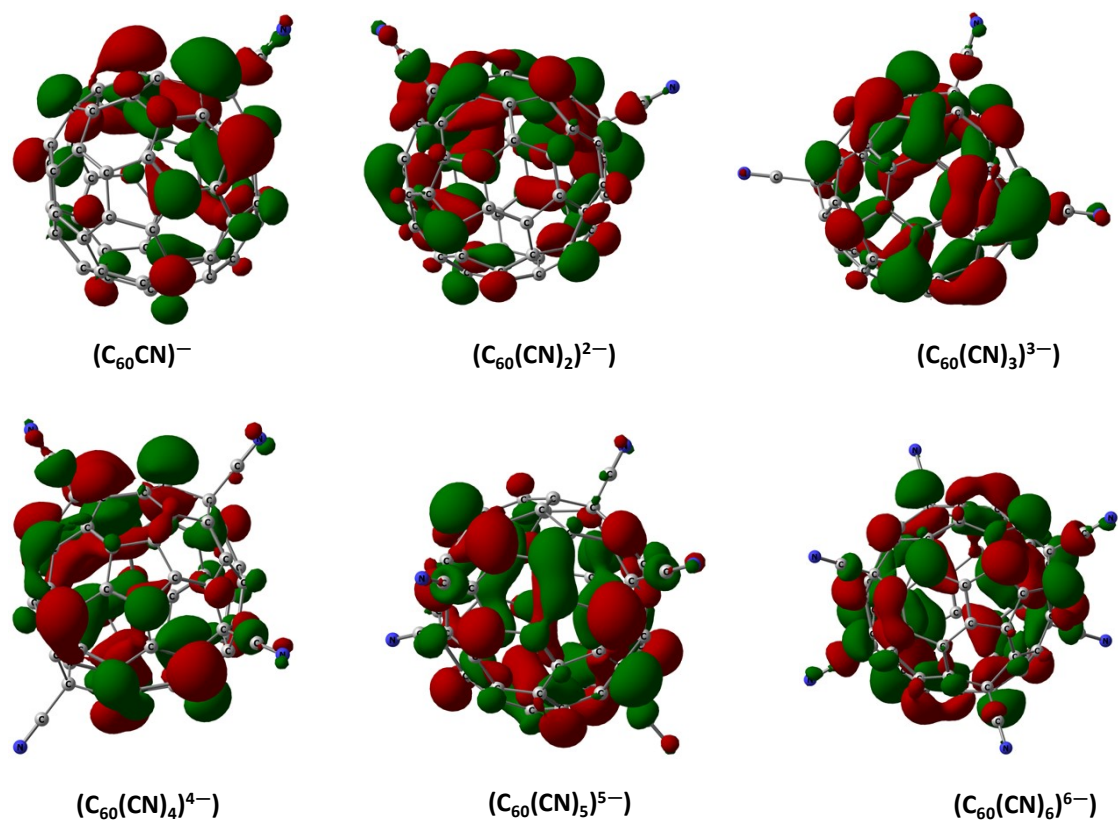

**Fig. S4** HOMO plots of  $(C_{60}(CN)_n)^{n-}$  for  $n = 1$  to  $6$  at M06L/6-311++G(d,p)//M06L/6-31G(d,p) level (isosurface value = 0.02 au).

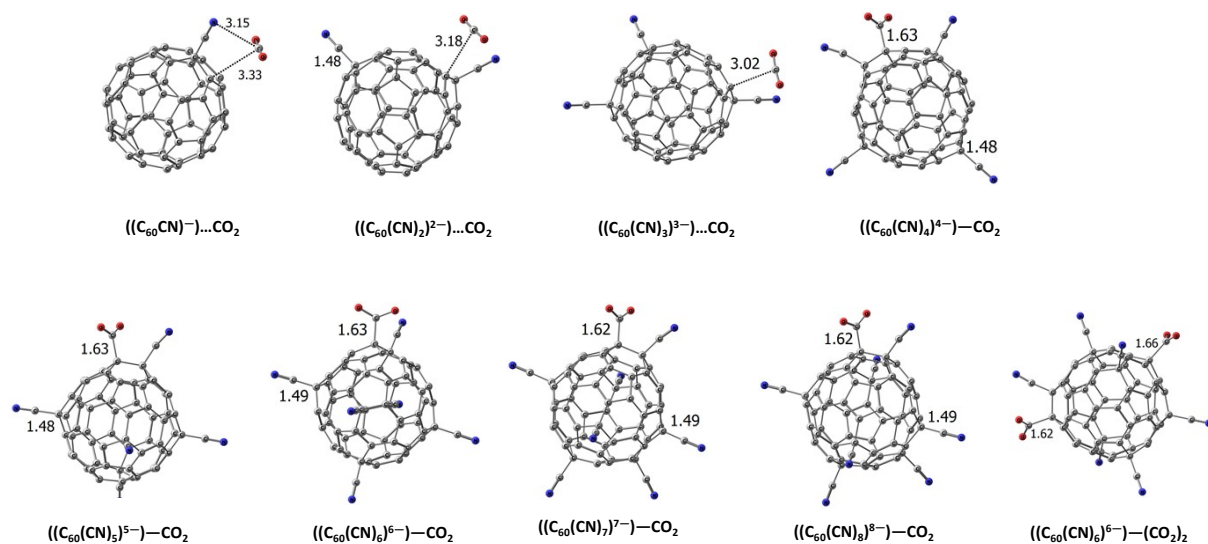

**Fig. S5** The optimized geometry of  $((C_{60}(CN)_n)^{n-}) - (CO_2)$  at M06L/6-31G(d,p) level. The distances are given in Å.

The binding energy of CO<sub>2</sub> with the bare fulleride anion ( $\Delta E^a$ ) is also calculated using equation,

$$\Delta E^a = E_8 - (E_4 + E_7) \quad (S1)$$

where  $E_8$ ,  $E_4$ , and  $E_7$  are the ZPE-corrected energy of the CO<sub>2</sub> complex of the bare fulleride, (C<sub>60</sub>(CN)<sub>*n*</sub>)<sup>*n*-</sup>, and '*n*' CO<sub>2</sub> respectively. The Gibbs energy change ( $\Delta G$ ) is also calculated in a similar fashion.

**Table S4.** Energetics of CO<sub>2</sub> complexes of ((C<sub>60</sub>(CN)<sub>*n*</sub>)<sup>*n*-</sup>) fullerides in kcal/mol.

| <i>n</i>                                                                              | $\Delta E^a$ | $\Delta G^a$ |
|---------------------------------------------------------------------------------------|--------------|--------------|
| ((C <sub>60</sub> (CN)) <sup>-</sup> )...(CO <sub>2</sub> )                           | -3.7         | 4.0          |
| ((C <sub>60</sub> (CN) <sub>2</sub> ) <sup>2-</sup> )...(CO <sub>2</sub> )            | -4.3         | 3.5          |
| ((C <sub>60</sub> (CN) <sub>3</sub> ) <sup>3-</sup> )...(CO <sub>2</sub> )            | -5.6         | 1.9          |
| ((C <sub>60</sub> (CN) <sub>3</sub> ) <sup>3-</sup> )—(CO <sub>2</sub> )              | 0.1          | 10.6         |
| ((C <sub>60</sub> (CN) <sub>4</sub> ) <sup>4-</sup> )—(CO <sub>2</sub> )              | -13.8        | -3.4         |
| ((C <sub>60</sub> (CN) <sub>5</sub> ) <sup>5-</sup> )—(CO <sub>2</sub> )              | -21.9        | -11.2        |
| ((C <sub>60</sub> (CN) <sub>6</sub> ) <sup>6-</sup> )—(CO <sub>2</sub> )              | -28.9        | -18.1        |
| ((C <sub>60</sub> (CN) <sub>6</sub> ) <sup>6-</sup> )—(CO <sub>2</sub> ) <sub>2</sub> | -37.0        | -13.7        |

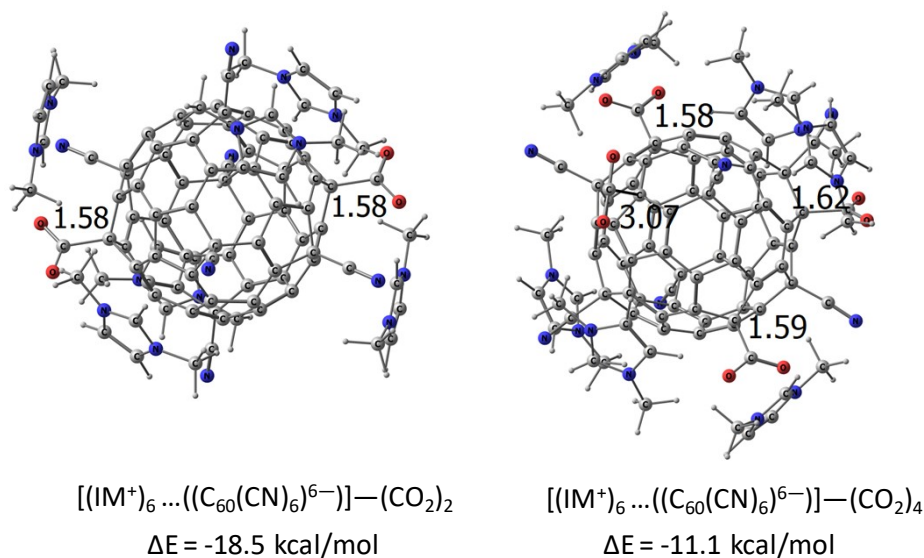

**Fig. S6** The optimized geometries of  $[(IM^+)_6 \dots ((C_{60}(CN)_6)^{6-})]-(CO_2)_2$  and  $[(IM^+)_6 \dots ((C_{60}(CN)_6)^{6-})]-(CO_2)_4$  at M06L/6-31G(d,p) level. The distances are given in Å.

### Basis set superposition error (BSSE)

The correction for the basis set superposition error (BSSE) with the ionic complex formation is also calculated made by the counterpoise (CP) approach of Boys and Bernardi. In the case of  $(IM^{n+}) \cdots ((C_{60}(CN)_n)^{n-})$ , for  $n = 1, 2$ , and  $3$  and but the BSSE calculation was not converging for the  $n = 4, 5$ , and  $6$ . Using the BSSE corrections of the systems  $n = 1, 2$ , and  $3$  a linear correlation graph in the form  $Y = (0.0027)*X + 0.0007$  was obtained with correlation coefficient  $R = 0.9998$ . by extrapolating which the approximate values for the BSSE corrections of the systems with  $n = 4, 5$ , and  $6$  can be calculated. The BSSE was found to be  $\sim 9\%$  of the  $E'_{\text{rea}}$  values.

**Table S5.** BSSE values of  $[(IM^+)_{n \cdots} ((C_{60}(CN)_n)^{n-})]$  complexes.

| n | BSSE (au) | BSSE (kcal/mol) |
|---|-----------|-----------------|
| 1 | 0.00336   | 2.1             |
| 2 | 0.00610   | 3.8             |
| 3 | 0.00869   | 5.5             |
| 4 | 0.01150   | 7.2             |
| 5 | 0.01420   | 8.9             |
| 6 | 0.01690   | 10.6            |

In the present study, we have not evaluated all the different attacks of  $CN^-$  on the carbon cage. There are too many possibilities when the number of  $CN$  increases. The reported ionic complex of fullerene represents one of the many such possible isomeric structures. The energetics will only improve with the identification of the global minimum (it could be more exothermic than the reported value) as the energetics of the reported structures give ample evidence for the fulleride formation.

**Table S6.** Energetics (kcal/mol) of  $CO_2$  complexes of  $[(IM^+)_{n \cdots} ((C_{60}(CN)_n)^{n-})]$  in the solvent DCM at M06L/SMD/6-311++G(d,p)// M06L/6-311++G(d,p) level.

| System      | $\Delta E'$ | $\Delta G'$ |
|-------------|-------------|-------------|
| <b>1nc</b>  | -1.7        | 5.3         |
| <b>1'nc</b> | -2.4        | 4.8         |
| <b>2nc</b>  | -2.0        | 7.1         |
| <b>3nc</b>  | -3.4        | 6.1         |
| <b>3c</b>   | -1.0        | 11.7        |
| <b>4nc</b>  | -4.0        | 3.4         |
| <b>4c</b>   | -15.7       | -3.6        |
| <b>5nc</b>  | -2.7        | 5.8         |
| <b>5c</b>   | -12.7       | -0.5        |
| <b>6nc</b>  | -3.4        | 5.5         |
| <b>6c</b>   | -17.9       | -5.5        |

To understand the kinetic feasibility of this reaction, the transition state for the for the first addition of CN<sup>-</sup> to C<sub>60</sub> is calculated in the presence of the solvent. The reaction intermediates involved in the formation (IM<sup>+</sup>)<sup>+</sup>...((C<sub>60</sub>(CN))<sup>-</sup>) ion-pair from the reaction of IMCN and C<sub>60</sub> were discussed in our previous publication [*Phys. Chem. Chem. Phys.*, 2021, **23**, 20086-20094]. Based on which we have studied the solvation (DCM) effects and the solvation effect incorporated relative energy data given in the Table show that the transition states is stabilized in solvent due to its high ionic character and in the solvent, the reaction is expected to be barrierless.

**Table S7.** Relative energy (kcal/mol) of the reaction intermediates of [(IM<sup>+</sup>)...((C<sub>60</sub>(CN))<sup>-</sup>)] formation in the solvent DCM at M06L/SMD/6-311++G(d,p)// M06L/6-311++G(d,p) level.

| System       | Relative energy (kcal/mol) |
|--------------|----------------------------|
| Reactant     | 0.0                        |
| ts1          | -12.0                      |
| Intermediate | -26.0                      |
| ts2          | -11.5                      |
| Product      | -29.3                      |

Cartesian coordinates of optimized geometry of (IM<sup>+</sup>)<sub>n</sub>...((C<sub>60</sub>(CN))<sub>n</sub>)<sup>n-</sup> for n = 1 to 6 at M06L/6-31G(d,p) level. Atomic number followed by X, Y, Z coordinates in Å.

| IM <sup>+</sup> ...((C <sub>60</sub> (CN)) <sup>-</sup> ) |              |              |              | (IM <sup>+</sup> ) <sub>2</sub> ...((C <sub>60</sub> (CN)) <sub>2</sub> ) <sup>2-</sup> |              |              |              |
|-----------------------------------------------------------|--------------|--------------|--------------|-----------------------------------------------------------------------------------------|--------------|--------------|--------------|
| 6                                                         | -1.692009000 | 1.955262000  | 2.860595000  | 6                                                                                       | 2.521001000  | -1.268362000 | -1.000715000 |
| 6                                                         | -0.361707000 | 2.399980000  | 2.519106000  | 6                                                                                       | 1.367500000  | -1.945721000 | -1.576476000 |
| 6                                                         | -1.887469000 | 0.661913000  | 3.349896000  | 6                                                                                       | 2.749948000  | -1.235214000 | 0.367149000  |
| 6                                                         | 0.726424000  | 1.535315000  | 2.681554000  | 6                                                                                       | 0.407074000  | -2.444033000 | -0.665623000 |
| 6                                                         | 1.763941000  | 1.472748000  | 1.680236000  | 6                                                                                       | -1.008465000 | -2.265230000 | -0.942742000 |
| 6                                                         | -0.450721000 | 3.216009000  | 1.341207000  | 6                                                                                       | 0.924159000  | -1.142372000 | -2.673643000 |
| 6                                                         | 0.552253000  | 3.125543000  | 0.368411000  | 6                                                                                       | -0.449899000 | -0.951820000 | -2.918964000 |
| 6                                                         | 1.696012000  | 2.290655000  | 0.565329000  | 6                                                                                       | -1.416002000 | -1.566063000 | -2.059359000 |
| 6                                                         | -3.892302000 | 0.402621000  | 1.951211000  | 6                                                                                       | 3.522467000  | 1.101762000  | 0.219949000  |
| 6                                                         | -3.690047000 | 1.738424000  | 1.437841000  | 6                                                                                       | 3.319162000  | 1.062846000  | -1.201314000 |
| 6                                                         | -3.008453000 | -0.124209000 | 2.896281000  | 6                                                                                       | 3.201048000  | -0.031132000 | 0.986351000  |
| 6                                                         | -2.609456000 | 2.501587000  | 1.883677000  | 6                                                                                       | 2.824415000  | -0.102563000 | -1.804864000 |
| 6                                                         | -1.842194000 | 3.284361000  | 0.942454000  | 6                                                                                       | 1.831585000  | -0.019509000 | -2.839746000 |
| 6                                                         | -4.042453000 | 1.735408000  | 0.034700000  | 6                                                                                       | 2.828925000  | 2.354934000  | -1.620675000 |
| 6                                                         | -3.300305000 | 2.494880000  | -0.871794000 | 6                                                                                       | 1.856107000  | 2.432980000  | -2.621525000 |
| 6                                                         | -2.180315000 | 3.280490000  | -0.407798000 | 6                                                                                       | 1.352684000  | 1.226536000  | -3.246865000 |
| 6                                                         | -3.036501000 | -2.298575000 | 1.742890000  | 6                                                                                       | 2.209128000  | 1.397069000  | 2.729883000  |
| 6                                                         | -3.946959000 | -1.749346000 | 0.764167000  | 6                                                                                       | 2.505987000  | 2.559945000  | 1.917233000  |
| 6                                                         | -2.568203000 | -1.500383000 | 2.787516000  | 6                                                                                       | 2.533683000  | 0.114298000  | 2.266481000  |
| 6                                                         | -4.376565000 | -0.423744000 | 0.868949000  | 6                                                                                       | 3.162808000  | 2.424000000  | 0.693777000  |
| 6                                                         | -4.461973000 | 0.397582000  | -0.316642000 | 6                                                                                       | 2.724970000  | 3.193496000  | -0.445463000 |
| 6                                                         | -3.606400000 | -2.303474000 | -0.526091000 | 6                                                                                       | 1.412344000  | 3.490236000  | 2.058258000  |
| 6                                                         | -3.687293000 | -1.509707000 | -1.671144000 | 6                                                                                       | 0.984248000  | 4.234893000  | 0.956257000  |



|   |              |              |              |   |              |              |              |
|---|--------------|--------------|--------------|---|--------------|--------------|--------------|
| 6 | -4.127494000 | -0.133884000 | -1.564967000 | 6 | 1.655853000  | 4.086844000  | -0.319910000 |
| 6 | -0.300738000 | -2.422478000 | 2.523489000  | 6 | 0.413334000  | -0.795698000 | 3.035391000  |
| 6 | -0.788144000 | -3.254154000 | 1.441082000  | 6 | 0.053144000  | 0.527212000  | 3.504467000  |
| 6 | -1.183905000 | -1.568106000 | 3.193175000  | 6 | 1.669853000  | -1.003215000 | 2.482740000  |
| 6 | -2.126979000 | -3.189431000 | 1.056730000  | 6 | 0.935168000  | 1.602758000  | 3.357854000  |
| 6 | -2.480111000 | -3.193211000 | -0.347211000 | 6 | 0.436768000  | 2.896396000  | 2.948627000  |
| 6 | 0.245632000  | -3.325981000 | 0.433818000  | 6 | -1.350926000 | 0.708740000  | 3.261213000  |
| 6 | -0.094654000 | -3.328598000 | -0.920648000 | 6 | -1.838515000 | 1.957571000  | 2.866118000  |
| 6 | -1.482504000 | -3.261392000 | -1.318863000 | 6 | -0.924961000 | 3.068152000  | 2.699754000  |
| 6 | 0.525959000  | 0.204746000  | 3.193597000  | 6 | 0.586623000  | -2.484227000 | 0.733282000  |
| 6 | 1.448320000  | -0.684844000 | 2.510920000  | 6 | -0.668326000 | -2.215629000 | 1.353079000  |
| 6 | -0.758608000 | -0.228906000 | 3.526768000  | 6 | 1.898151000  | -2.053915000 | 1.371622000  |
| 6 | 1.034740000  | -1.992807000 | 2.196954000  | 6 | -0.785444000 | -1.460465000 | 2.551024000  |
| 6 | 1.362799000  | -2.534177000 | 0.900153000  | 6 | -1.846978000 | -0.509582000 | 2.643121000  |
| 6 | 2.245548000  | 0.091443000  | 1.605313000  | 6 | -1.691014000 | -2.162944000 | 0.338982000  |
| 6 | 2.502638000  | -0.419072000 | 0.319439000  | 6 | -2.709545000 | -1.204022000 | 0.442939000  |
| 6 | 2.092396000  | -1.774003000 | -0.015329000 | 6 | -2.830593000 | -0.397339000 | 1.641574000  |
| 6 | -0.233270000 | -2.005079000 | -2.849958000 | 6 | -2.556696000 | 3.218101000  | 1.033780000  |
| 6 | 0.669351000  | -2.543988000 | -1.865250000 | 6 | -2.848285000 | 2.060730000  | 1.838923000  |
| 6 | 1.745127000  | -1.778988000 | -1.408785000 | 6 | -3.306430000 | 0.886139000  | 1.230060000  |
| 6 | -0.017471000 | -0.698844000 | -3.325394000 | 6 | -2.753136000 | 3.155591000  | -0.358295000 |
| 6 | -2.441959000 | -0.243205000 | -3.182897000 | 6 | -0.627584000 | 4.372731000  | -0.721630000 |
| 6 | -2.658264000 | -1.581234000 | -2.682245000 | 6 | -0.424170000 | 4.425045000  | 0.707160000  |
| 6 | -1.565170000 | -2.435455000 | -2.506735000 | 6 | -1.368762000 | 3.843336000  | 1.561938000  |
| 6 | -1.152576000 | 0.189600000  | -3.494970000 | 6 | -1.761349000 | 3.739209000  | -1.239938000 |
| 6 | -1.618861000 | 2.388158000  | -2.493292000 | 6 | -0.419386000 | 2.718978000  | -3.032741000 |
| 6 | -2.952529000 | 1.944229000  | -2.164497000 | 6 | 0.759113000  | 3.362468000  | -2.498944000 |
| 6 | -3.354629000 | 0.649193000  | -2.497551000 | 6 | 0.655644000  | 4.163325000  | -1.354714000 |
| 6 | -0.733895000 | 1.521859000  | -3.144538000 | 6 | -1.656797000 | 2.908562000  | -2.410924000 |
| 6 | 1.120602000  | 2.288706000  | -1.746727000 | 6 | -2.238463000 | 0.555191000  | -2.748188000 |
| 6 | 0.201577000  | 3.123638000  | -1.035235000 | 6 | -0.940181000 | 0.341657000  | -3.318555000 |
| 6 | -1.142353000 | 3.209651000  | -1.417022000 | 6 | -0.053305000 | 1.414919000  | -3.512113000 |
| 6 | 0.653704000  | 1.463259000  | -2.753381000 | 6 | -2.572134000 | 1.802131000  | -2.254436000 |
| 6 | 1.959291000  | -0.429519000 | -1.909374000 | 6 | -3.513361000 | 0.834670000  | -0.212701000 |
| 6 | 2.517866000  | 0.366056000  | -0.864303000 | 6 | -3.244411000 | -0.491057000 | -0.666995000 |
| 6 | 2.274737000  | 1.872724000  | -0.807878000 | 6 | -2.729343000 | -0.748239000 | -2.082370000 |
| 6 | 1.108897000  | 0.079270000  | -2.900565000 | 6 | -3.282655000 | 1.979673000  | -0.985928000 |
| 7 | 4.623059000  | 2.991094000  | -1.252750000 | 7 | -4.662189000 | -2.065506000 | -3.303991000 |
| 6 | 3.546311000  | 2.564675000  | -1.084836000 | 6 | -3.780115000 | -1.452226000 | -2.838738000 |
| 6 | 5.516435000  | 0.056261000  | -0.371140000 | 7 | 3.392860000  | -4.093431000 | 2.139082000  |
| 7 | 5.491544000  | -1.257313000 | -0.619006000 | 6 | 2.698796000  | -3.199991000 | 1.839395000  |
| 7 | 5.586724000  | 0.236195000  | 0.950499000  | 6 | 5.311077000  | -3.155761000 | -0.034185000 |
| 6 | 5.569244000  | -0.997734000 | 1.566193000  | 7 | 5.244596000  | -2.834763000 | -1.329605000 |
| 1 | 5.580242000  | -1.095532000 | 2.638878000  | 7 | 5.804446000  | -2.110351000 | 0.634825000  |
| 6 | 5.509467000  | -1.934127000 | 0.582641000  | 6 | 6.037864000  | -1.084457000 | -0.253893000 |
| 1 | 5.457856000  | -3.009163000 | 0.628613000  | 1 | 6.396444000  | -0.121754000 | 0.070208000  |
| 1 | 5.483236000  | 0.854179000  | -1.100948000 | 6 | 5.681201000  | -1.537155000 | -1.486557000 |
| 6 | 5.539623000  | 1.528879000  | 1.622626000  | 1 | 5.664485000  | -1.044138000 | -2.444043000 |
| 1 | 6.307682000  | 1.563708000  | 2.395656000  | 6 | 5.921792000  | -2.013946000 | 2.082713000  |
| 1 | 5.708624000  | 2.314314000  | 0.886563000  | 1 | 5.242283000  | -1.230694000 | 2.432028000  |
| 1 | 4.549320000  | 1.660715000  | 2.067254000  | 1 | 5.621818000  | -2.962356000 | 2.525240000  |
| 6 | 5.281420000  | -1.850776000 | -1.930571000 | 1 | 6.948851000  | -1.768107000 | 2.355090000  |
| 1 | 6.026410000  | -2.626850000 | -2.109240000 | 6 | 4.581389000  | -3.625982000 | -2.355361000 |
| 1 | 4.273330000  | -2.270854000 | -1.977506000 | 1 | 3.551547000  | -3.267787000 | -2.469292000 |
| 1 | 5.374741000  | -1.074491000 | -2.688197000 | 1 | 4.960394000  | -4.070210000 | 0.422194000  |

|                                      |              |              |              |              |
|--------------------------------------|--------------|--------------|--------------|--------------|
|                                      | 1            | 5.122718000  | -3.525424000 | -3.295633000 |
|                                      | 1            | 4.574187000  | -4.672022000 | -2.052553000 |
|                                      | 6            | -5.379024000 | -2.516534000 | -0.183329000 |
|                                      | 7            | -4.704342000 | -3.651070000 | 0.027183000  |
|                                      | 7            | -5.704500000 | -1.991701000 | 1.004311000  |
|                                      | 6            | -5.185292000 | -2.794006000 | 1.998558000  |
|                                      | 1            | -5.282813000 | -2.537572000 | 3.040149000  |
|                                      | 6            | -4.555562000 | -3.831313000 | 1.387559000  |
|                                      | 1            | -3.992450000 | -4.655803000 | 1.791224000  |
|                                      | 6            | -6.350688000 | -0.701519000 | 1.181556000  |
|                                      | 1            | -5.986064000 | -0.252474000 | 2.104587000  |
|                                      | 1            | -6.056997000 | -0.053200000 | 0.353570000  |
|                                      | 1            | -7.436581000 | -0.811630000 | 1.215780000  |
|                                      | 6            | -4.065778000 | -4.444177000 | -1.013816000 |
|                                      | 1            | -2.994995000 | -4.218568000 | -1.022913000 |
|                                      | 1            | -5.613674000 | -2.111029000 | -1.157859000 |
|                                      | 1            | -4.227881000 | -5.503535000 | -0.812103000 |
|                                      | 1            | -4.495985000 | -4.172190000 | -1.977504000 |
| $(IM^+)_{3...}((C_{60}(CN)_3)^{3-})$ |              |              |              |              |
| 6                                    | -0.793235000 | -3.587328000 | 0.251985000  |              |
| 6                                    | 0.582301000  | -3.658478000 | 0.692495000  |              |
| 6                                    | -1.079688000 | -3.234542000 | -1.071498000 |              |
| 6                                    | 1.610339000  | -3.373319000 | -0.214988000 |              |
| 6                                    | 2.755948000  | -2.600040000 | 0.210299000  |              |
| 6                                    | 0.649163000  | -3.156608000 | 2.034181000  |              |
| 6                                    | 1.757143000  | -2.381713000 | 2.424775000  |              |
| 6                                    | 2.837050000  | -2.148951000 | 1.521215000  |              |
| 6                                    | -2.961996000 | -1.846875000 | -0.327991000 |              |
| 6                                    | -2.612265000 | -2.142469000 | 1.020346000  |              |
| 6                                    | -2.180879000 | -2.343096000 | -1.370803000 |              |
| 6                                    | -1.583842000 | -3.053634000 | 1.330274000  |              |
| 6                                    | -0.685681000 | -2.769606000 | 2.434538000  |              |
| 6                                    | -2.827526000 | -0.969417000 | 1.840108000  |              |
| 6                                    | -1.980789000 | -0.733114000 | 2.943627000  |              |
| 6                                    | -0.879408000 | -1.634334000 | 3.213670000  |              |
| 6                                    | -2.165733000 | -0.178777000 | -2.462770000 |              |
| 6                                    | -2.982179000 | 0.394129000  | -1.474319000 |              |
| 6                                    | -1.821397000 | -1.545960000 | -2.528362000 |              |
| 6                                    | -3.629101000 | -0.449749000 | -0.390946000 |              |
| 6                                    | -3.309589000 | 0.088563000  | 1.020025000  |              |
| 6                                    | -2.453532000 | 1.695893000  | -1.198708000 |              |
| 6                                    | -2.480158000 | 2.264793000  | 0.104186000  |              |
| 6                                    | -2.815336000 | 1.380846000  | 1.201202000  |              |
| 6                                    | 0.452624000  | -0.921981000 | -3.295410000 |              |
| 6                                    | 0.065884000  | 0.458785000  | -3.357748000 |              |
| 6                                    | -0.474194000 | -1.909980000 | -2.888347000 |              |
| 6                                    | -1.200699000 | 0.843341000  | -2.896324000 |              |
| 6                                    | -1.455107000 | 2.022123000  | -2.163223000 |              |
| 6                                    | 1.201936000  | 1.250289000  | -2.895666000 |              |
| 6                                    | 1.045553000  | 2.401926000  | -2.140179000 |              |
| 6                                    | -0.344489000 | 3.015475000  | -1.864707000 |              |
| 6                                    | 1.317131000  | -3.038793000 | -1.583496000 |              |
| 6                                    | 2.264963000  | -2.041101000 | -2.008717000 |              |
| 6                                    | -0.023398000 | -2.957051000 | -2.008810000 |              |
| $(IM^+)_{4...}((C_{60}(CN)_4)^{4-})$ |              |              |              |              |
| 6                                    | -0.571291000 | -2.263318000 | 2.872043000  |              |
| 6                                    | 0.720872000  | -1.721406000 | 3.287148000  |              |
| 6                                    | -0.702981000 | -3.011629000 | 1.704293000  |              |
| 6                                    | 1.830081000  | -1.918772000 | 2.449691000  |              |
| 6                                    | 2.780311000  | -0.843463000 | 2.242421000  |              |
| 6                                    | 0.496535000  | -0.429088000 | 3.843212000  |              |
| 6                                    | 1.410209000  | 0.620979000  | 3.615181000  |              |
| 6                                    | 2.593362000  | 0.389016000  | 2.859804000  |              |
| 6                                    | -2.766872000 | -1.826538000 | 1.099629000  |              |
| 6                                    | -2.669111000 | -1.081666000 | 2.331019000  |              |
| 6                                    | -1.794312000 | -2.800183000 | 0.816260000  |              |
| 6                                    | -1.578178000 | -1.290582000 | 3.191958000  |              |
| 6                                    | -0.929927000 | -0.152805000 | 3.793335000  |              |
| 6                                    | -3.150452000 | 0.237104000  | 2.069982000  |              |
| 6                                    | -2.526188000 | 1.344458000  | 2.667590000  |              |
| 6                                    | -1.395600000 | 1.137807000  | 3.549362000  |              |
| 6                                    | -1.854017000 | -2.075241000 | -1.571669000 |              |
| 6                                    | -3.118575000 | -1.210359000 | -1.385068000 |              |
| 6                                    | -1.304965000 | -2.861022000 | -0.560327000 |              |
| 6                                    | -3.416814000 | -1.026045000 | 0.102775000  |              |
| 6                                    | -3.534681000 | 0.279044000  | 0.664470000  |              |
| 6                                    | -2.708372000 | 0.106905000  | -2.097354000 |              |
| 6                                    | -2.818638000 | 1.337934000  | -1.444348000 |              |
| 6                                    | -3.329382000 | 1.454747000  | -0.070730000 |              |
| 6                                    | 0.951222000  | -2.547216000 | -1.435934000 |              |
| 6                                    | 0.403713000  | -1.701258000 | -2.463910000 |              |
| 6                                    | 0.088061000  | -3.168300000 | -0.539390000 |              |
| 6                                    | -0.972256000 | -1.436164000 | -2.489140000 |              |
| 6                                    | -1.460740000 | -0.108428000 | -2.786497000 |              |
| 6                                    | 1.353507000  | -0.655767000 | -2.716818000 |              |
| 6                                    | 0.862423000  | 0.632132000  | -2.954891000 |              |
| 6                                    | -0.541337000 | 0.896417000  | -3.087080000 |              |
| 6                                    | 1.793541000  | -2.727747000 | 1.278998000  |              |

|   |              |              |              |   |              |              |              |
|---|--------------|--------------|--------------|---|--------------|--------------|--------------|
| 6 | 1.825889000  | -1.000265000 | -2.849739000 | 6 | 2.609253000  | -2.097590000 | 0.304340000  |
| 6 | 2.281978000  | 0.338719000  | -2.598623000 | 6 | 0.531853000  | -3.496082000 | 0.906701000  |
| 6 | 3.184371000  | -1.784903000 | -0.922260000 | 6 | 2.281177000  | -2.088444000 | -1.091258000 |
| 6 | 3.564872000  | -0.464575000 | -0.646571000 | 6 | 2.477375000  | -0.871414000 | -1.822779000 |
| 6 | 3.145671000  | 0.604555000  | -1.528382000 | 6 | 3.317331000  | -0.989204000 | 0.904702000  |
| 6 | 1.112770000  | 3.188995000  | 0.074212000  | 6 | 3.468401000  | 0.200475000  | 0.153496000  |
| 6 | 1.889501000  | 2.628548000  | -1.009556000 | 6 | 3.119996000  | 0.241293000  | -1.250214000 |
| 6 | 2.954484000  | 1.767764000  | -0.722995000 | 6 | 0.538225000  | 2.773235000  | -2.078790000 |
| 6 | 1.445777000  | 2.858219000  | 1.406796000  | 6 | 1.518247000  | 1.776895000  | -2.367973000 |
| 6 | -0.967603000 | 2.632542000  | 1.887182000  | 6 | 2.608683000  | 1.562238000  | -1.511607000 |
| 6 | -1.281932000 | 2.973071000  | 0.518748000  | 6 | 0.622535000  | 3.452155000  | -0.863957000 |
| 6 | -0.240546000 | 3.296159000  | -0.347176000 | 6 | -1.771562000 | 3.120205000  | -0.439252000 |
| 6 | 0.373216000  | 2.568307000  | 2.318710000  | 6 | -1.954434000 | 2.440038000  | -1.685942000 |
| 6 | -0.125935000 | 0.530230000  | 3.598352000  | 6 | -0.819090000 | 2.363777000  | -2.705226000 |
| 6 | -1.506288000 | 0.600921000  | 3.160954000  | 6 | -0.561432000 | 3.689737000  | -0.039897000 |
| 6 | -1.909045000 | 1.636382000  | 2.306457000  | 6 | -1.008152000 | 3.066434000  | 2.308768000  |
| 6 | 0.794889000  | 1.499937000  | 3.181134000  | 6 | -2.295379000 | 2.539256000  | 1.910196000  |
| 6 | 2.520299000  | -0.214561000 | 2.873668000  | 6 | -2.666658000 | 2.555813000  | 0.548968000  |
| 6 | 1.557096000  | -1.205239000 | 3.234191000  | 6 | -0.157981000 | 3.625514000  | 1.341325000  |
| 6 | 0.259194000  | -0.847343000 | 3.644461000  | 6 | 1.794802000  | 2.585919000  | 2.403436000  |
| 6 | 2.136722000  | 1.117618000  | 2.796254000  | 6 | 0.920933000  | 1.954123000  | 3.342897000  |
| 6 | 3.271062000  | 1.405169000  | 0.654305000  | 6 | -0.457867000 | 2.220400000  | 3.329920000  |
| 6 | 3.750835000  | 0.062954000  | 0.669433000  | 6 | 1.260585000  | 3.362467000  | 1.387050000  |
| 6 | 3.550541000  | -0.827468000 | 1.898979000  | 6 | 2.722375000  | 2.319909000  | -0.285335000 |
| 6 | 2.559131000  | 1.991169000  | 1.709793000  | 6 | 3.355648000  | 1.506267000  | 0.708633000  |
| 7 | 5.969888000  | -1.289566000 | 2.848767000  | 6 | 3.050660000  | 1.710354000  | 2.194822000  |
| 6 | 4.868231000  | -1.091654000 | 2.504619000  | 6 | 1.750189000  | 3.285310000  | 0.011725000  |
| 6 | 6.553316000  | -0.543836000 | -0.230192000 | 7 | 5.271968000  | 2.635939000  | 3.285011000  |
| 7 | 6.507963000  | 0.354848000  | -1.222733000 | 6 | 4.248521000  | 2.259748000  | 2.855789000  |
| 7 | 6.488091000  | -1.766698000 | -0.766362000 | 6 | 6.339422000  | 1.145125000  | 0.698177000  |
| 6 | 6.354721000  | -1.644412000 | -2.134093000 | 7 | 6.402281000  | 1.093397000  | -0.637995000 |
| 1 | 6.228939000  | -2.504631000 | -2.769683000 | 7 | 6.453741000  | -0.097040000 | 1.176161000  |
| 6 | 6.369448000  | -0.316308000 | -2.419762000 | 6 | 6.526156000  | -0.973596000 | 0.113472000  |
| 1 | 6.260353000  | 0.209896000  | -3.353266000 | 1 | 6.567405000  | -2.038757000 | 0.265581000  |
| 1 | 6.627821000  | -0.337739000 | 0.828619000  | 6 | 6.489771000  | -0.229550000 | -1.022941000 |
| 6 | 6.396518000  | -3.004324000 | -0.003469000 | 1 | 6.491675000  | -0.514680000 | -2.061284000 |
| 1 | 7.028597000  | -3.762276000 | -0.467521000 | 1 | 6.230014000  | 2.031345000  | 1.308948000  |
| 1 | 6.723770000  | -2.811719000 | 1.018155000  | 6 | 6.337836000  | -0.466662000 | 2.580267000  |
| 1 | 5.353703000  | -3.334776000 | 0.012170000  | 1 | 7.114761000  | -1.191340000 | 2.827790000  |
| 6 | 6.406036000  | 1.788825000  | -1.011484000 | 1 | 6.448983000  | 0.430302000  | 3.189047000  |
| 1 | 7.389490000  | 2.224587000  | -0.823231000 | 1 | 5.344617000  | -0.895899000 | 2.748307000  |
| 1 | 5.959672000  | 2.241987000  | -1.895082000 | 6 | 6.099495000  | 2.212722000  | -1.512489000 |
| 1 | 5.739132000  | 1.961331000  | -0.161674000 | 1 | 6.739805000  | 2.168880000  | -2.394388000 |
| 7 | -6.218665000 | -0.839550000 | -0.761432000 | 1 | 5.044558000  | 2.165460000  | -1.801414000 |
| 1 | -6.267808000 | -3.007227000 | -0.072505000 | 1 | 6.287651000  | 3.142236000  | -0.976659000 |
| 6 | -5.080975000 | -0.618950000 | -0.590623000 | 7 | -5.285771000 | -2.362484000 | -2.375134000 |
| 6 | -5.492957000 | -3.749001000 | -0.205804000 | 6 | -4.303445000 | -1.841357000 | -2.003767000 |
| 7 | -4.837277000 | -4.397136000 | 0.761100000  | 6 | -5.761159000 | -2.355443000 | 0.852766000  |
| 7 | -4.960629000 | -4.091704000 | -1.381247000 | 7 | -5.949670000 | -1.749065000 | 2.036362000  |
| 6 | -3.916097000 | -4.961210000 | -1.155334000 | 7 | -5.347281000 | -3.611052000 | 1.089851000  |
| 1 | -3.297747000 | -5.326648000 | -1.958038000 | 6 | -5.197367000 | -3.777907000 | 2.454086000  |
| 6 | -3.840080000 | -5.156427000 | 0.188794000  | 1 | -4.803903000 | -4.689104000 | 2.872228000  |
| 1 | -3.138978000 | -5.715779000 | 0.785377000  | 6 | -5.585719000 | -2.620008000 | 3.044621000  |
| 6 | -5.244226000 | -3.432829000 | -2.649487000 | 1 | -5.604341000 | -2.323022000 | 4.079755000  |
| 1 | -5.471561000 | -4.179055000 | -3.411640000 | 1 | -5.992207000 | -1.960836000 | -0.125656000 |

|                                        |              |              |              |                                        |              |              |              |
|----------------------------------------|--------------|--------------|--------------|----------------------------------------|--------------|--------------|--------------|
| 1                                      | -6.085208000 | -2.754410000 | -2.512964000 | 6                                      | -4.881914000 | -4.526731000 | 0.062470000  |
| 1                                      | -4.359823000 | -2.852162000 | -2.936875000 | 1                                      | -5.083013000 | -5.550457000 | 0.380335000  |
| 6                                      | -5.011068000 | -4.183280000 | 2.188436000  | 1                                      | -5.401669000 | -4.307996000 | -0.870704000 |
| 1                                      | -5.357125000 | -5.098720000 | 2.670866000  | 1                                      | -3.806705000 | -4.384442000 | -0.087709000 |
| 1                                      | -4.049860000 | -3.871201000 | 2.606338000  | 6                                      | -6.412318000 | -0.382841000 | 2.197959000  |
| 1                                      | -5.737603000 | -3.386447000 | 2.341538000  | 1                                      | -7.500079000 | -0.352647000 | 2.307115000  |
| 7                                      | -0.830155000 | 5.355725000  | -2.989733000 | 1                                      | -5.931054000 | 0.052074000  | 3.073337000  |
| 1                                      | -1.402198000 | 6.208175000  | -0.922668000 | 1                                      | -6.098792000 | 0.193786000  | 1.326147000  |
| 6                                      | -0.568776000 | 4.303665000  | -2.546122000 | 7                                      | 0.931243000  | -6.108214000 | 0.936692000  |
| 6                                      | -2.058569000 | 5.902377000  | -0.118251000 | 6                                      | 1.260247000  | -5.527918000 | -2.170757000 |
| 7                                      | -1.789776000 | 5.937769000  | 1.190891000  | 7                                      | 2.544077000  | -5.163030000 | -2.173609000 |
| 7                                      | -3.267870000 | 5.366453000  | -0.289637000 | 7                                      | 0.684563000  | -5.066013000 | -3.286442000 |
| 6                                      | -3.770521000 | 5.006774000  | 0.941539000  | 6                                      | 1.621319000  | -4.345566000 | -3.999761000 |
| 1                                      | -4.720074000 | 4.508648000  | 1.040644000  | 1                                      | 1.365242000  | -3.827922000 | -4.908774000 |
| 6                                      | -2.845210000 | 5.366917000  | 1.872883000  | 6                                      | 2.785824000  | -4.407288000 | -3.299975000 |
| 1                                      | -2.823163000 | 5.233412000  | 2.941335000  | 1                                      | 3.747407000  | -3.959581000 | -3.484281000 |
| 6                                      | -3.857082000 | 5.024842000  | -1.577973000 | 1                                      | 0.779790000  | -6.072632000 | -1.368439000 |
| 1                                      | -4.887539000 | 5.379989000  | -1.613684000 | 6                                      | -0.749807000 | -5.033151000 | -3.519255000 |
| 1                                      | -3.265596000 | 5.485709000  | -2.368362000 | 1                                      | -0.953013000 | -5.205398000 | -4.576426000 |
| 1                                      | -3.820225000 | 3.936390000  | -1.690851000 | 1                                      | -1.224930000 | -5.814797000 | -2.927760000 |
| 6                                      | -0.477520000 | 6.203729000  | 1.756332000  | 1                                      | -1.140003000 | -4.056169000 | -3.212729000 |
| 1                                      | -0.575235000 | 6.843610000  | 2.634020000  | 6                                      | 3.467984000  | -5.353020000 | -1.063510000 |
| 1                                      | -0.013323000 | 5.250641000  | 2.033229000  | 1                                      | 4.427152000  | -5.702853000 | -1.447727000 |
| 1                                      | 0.138912000  | 6.701135000  | 1.008949000  | 1                                      | 3.582233000  | -4.393666000 | -0.545699000 |
|                                        |              |              |              | 1                                      | 3.044129000  | -6.081998000 | -0.373468000 |
|                                        |              |              |              | 6                                      | 0.730020000  | -4.954892000 | 0.993113000  |
|                                        |              |              |              | 7                                      | -1.416267000 | 4.040511000  | -4.660261000 |
|                                        |              |              |              | 6                                      | -1.135010000 | 3.243431000  | -3.848523000 |
|                                        |              |              |              | 6                                      | -1.698834000 | 5.893126000  | -2.041626000 |
|                                        |              |              |              | 7                                      | -1.152990000 | 6.430159000  | -0.945163000 |
|                                        |              |              |              | 7                                      | -3.001445000 | 5.697062000  | -1.812157000 |
|                                        |              |              |              | 6                                      | -3.284684000 | 6.090893000  | -0.524313000 |
|                                        |              |              |              | 1                                      | -4.269494000 | 5.978147000  | -0.102934000 |
|                                        |              |              |              | 6                                      | -2.127514000 | 6.556379000  | 0.018157000  |
|                                        |              |              |              | 1                                      | -1.902308000 | 6.920789000  | 1.006599000  |
|                                        |              |              |              | 1                                      | -1.185718000 | 5.614816000  | -2.953095000 |
|                                        |              |              |              | 6                                      | -3.895925000 | 4.960395000  | -2.693310000 |
|                                        |              |              |              | 1                                      | -4.912358000 | 5.327359000  | -2.553699000 |
|                                        |              |              |              | 1                                      | -3.575291000 | 5.099686000  | -3.725036000 |
|                                        |              |              |              | 1                                      | -3.811961000 | 3.893185000  | -2.444231000 |
|                                        |              |              |              | 6                                      | 0.263906000  | 6.695080000  | -0.750521000 |
|                                        |              |              |              | 1                                      | 0.450453000  | 7.771159000  | -0.743572000 |
|                                        |              |              |              | 1                                      | 0.824380000  | 6.214257000  | -1.551195000 |
|                                        |              |              |              | 1                                      | 0.575456000  | 6.241951000  | 0.193159000  |
| $(IM^+)_{5\dots}((C_{60}(CN)_5)^{5-})$ |              |              |              | $(IM^+)_{6\dots}((C_{60}(CN)_6)^{6-})$ |              |              |              |
| 6                                      | 2.747785000  | 1.157523000  | -1.947127000 | 6                                      | 2.845255000  | 0.716943000  | -1.964721000 |
| 6                                      | 3.502142000  | 0.946058000  | -0.762979000 | 6                                      | 2.989022000  | 1.790223000  | -1.050942000 |
| 6                                      | 1.775517000  | 2.181536000  | -2.076714000 | 6                                      | 1.859841000  | 0.679816000  | -2.978281000 |
| 6                                      | 3.370211000  | 1.878355000  | 0.441134000  | 6                                      | 2.118267000  | 3.038210000  | -1.161009000 |
| 6                                      | 3.045459000  | 1.107706000  | 1.737391000  | 6                                      | 1.416851000  | 3.373001000  | 0.178494000  |
| 6                                      | 3.670180000  | -0.459806000 | -0.593057000 | 6                                      | 3.373628000  | 1.242827000  | 0.202026000  |
| 6                                      | 3.551054000  | -1.083164000 | 0.661748000  | 6                                      | 2.836823000  | 1.730042000  | 1.416752000  |

|   |              |              |              |   |              |              |              |
|---|--------------|--------------|--------------|---|--------------|--------------|--------------|
| 6 | 3.208191000  | -0.271788000 | 1.810451000  | 6 | 1.828688000  | 2.742427000  | 1.363987000  |
| 6 | 0.328686000  | 0.664430000  | -3.416054000 | 6 | 1.603111000  | -1.746598000 | -2.594028000 |
| 6 | 1.336885000  | -0.360704000 | -3.289673000 | 6 | 2.674913000  | -1.707468000 | -1.648011000 |
| 6 | 0.532468000  | 1.904113000  | -2.761737000 | 6 | 1.180847000  | -0.558160000 | -3.249332000 |
| 6 | 2.532944000  | -0.120891000 | -2.591805000 | 6 | 3.278170000  | -0.502834000 | -1.307586000 |
| 6 | 3.095114000  | -1.131655000 | -1.749511000 | 6 | 3.698281000  | -0.168509000 | 0.041989000  |
| 6 | 0.688152000  | -1.632950000 | -3.145598000 | 6 | 2.478750000  | -2.827220000 | -0.598705000 |
| 6 | 1.256134000  | -2.609289000 | -2.308532000 | 6 | 2.647277000  | -2.277327000 | 0.805918000  |
| 6 | 2.494958000  | -2.393860000 | -1.655155000 | 6 | 3.276484000  | -1.069672000 | 1.052994000  |
| 6 | -1.784506000 | 1.886154000  | -1.929593000 | 6 | -1.185040000 | -1.201139000 | -3.001432000 |
| 6 | -1.999665000 | 0.616568000  | -2.566778000 | 6 | -0.764073000 | -2.398758000 | -2.317155000 |
| 6 | -0.546905000 | 2.575083000  | -2.086723000 | 6 | -0.211033000 | -0.303796000 | -3.521256000 |
| 6 | -0.947821000 | 0.010721000  | -3.280770000 | 6 | 0.597424000  | -2.660330000 | -2.100027000 |
| 6 | -0.743536000 | -1.404737000 | -3.157509000 | 6 | 1.030241000  | -3.271579000 | -0.888919000 |
| 6 | -2.859583000 | -0.163711000 | -1.715822000 | 6 | -1.708266000 | -2.665115000 | -1.265899000 |
| 6 | -2.723604000 | -1.566936000 | -1.665344000 | 6 | -1.297145000 | -3.296145000 | -0.079379000 |
| 6 | -1.580867000 | -2.136453000 | -2.294783000 | 6 | 0.101532000  | -3.449312000 | 0.138180000  |
| 6 | -0.688568000 | 3.246862000  | 0.316424000  | 6 | -1.604656000 | 1.599747000  | -2.731481000 |
| 6 | -2.147543000 | 2.754438000  | 0.449285000  | 6 | -2.802087000 | 0.684037000  | -2.392797000 |
| 6 | 0.008748000  | 3.166315000  | -0.893534000 | 6 | -0.424836000 | 1.100211000  | -3.293248000 |
| 6 | -2.578097000 | 1.928855000  | -0.753619000 | 6 | -2.420745000 | -0.789578000 | -2.431486000 |
| 6 | -3.230750000 | 0.651643000  | -0.588468000 | 6 | -2.715291000 | -1.650217000 | -1.318180000 |
| 6 | -2.066098000 | 1.901961000  | 1.734746000  | 6 | -3.146079000 | 1.151249000  | -0.951865000 |
| 6 | -2.789165000 | 0.696506000  | 1.876451000  | 6 | -3.556537000 | 0.249232000  | 0.060399000  |
| 6 | -3.277286000 | 0.025139000  | 0.687783000  | 6 | -3.250528000 | -1.165474000 | -0.101243000 |
| 6 | 2.107595000  | 2.772780000  | 0.325520000  | 6 | 0.893554000  | 2.779087000  | -2.076663000 |
| 6 | 1.383127000  | 2.757376000  | 1.550876000  | 6 | -0.290874000 | 3.199120000  | -1.418291000 |
| 6 | 1.432530000  | 2.922007000  | -0.887217000 | 6 | 0.849456000  | 1.715780000  | -2.976913000 |
| 6 | -0.011178000 | 2.935915000  | 1.530328000  | 6 | -1.521728000 | 2.594233000  | -1.719835000 |
| 6 | -0.893815000 | 2.205240000  | 2.408226000  | 6 | -2.529510000 | 2.368253000  | -0.708511000 |
| 6 | 1.941812000  | 1.712075000  | 2.403998000  | 6 | 0.020257000  | 3.529043000  | -0.038031000 |
| 6 | 1.143503000  | 0.969067000  | 3.272482000  | 6 | -0.907277000 | 3.349201000  | 0.988442000  |
| 6 | -0.344719000 | 1.298767000  | 3.496064000  | 6 | -2.356823000 | 2.916513000  | 0.700360000  |
| 6 | -2.351787000 | -1.596293000 | 2.022811000  | 6 | -2.726694000 | -0.634463000 | 2.066215000  |
| 6 | -2.152088000 | -0.323245000 | 2.673032000  | 6 | -3.147777000 | 0.581767000  | 1.404507000  |
| 6 | -0.988642000 | -0.108703000 | 3.411157000  | 6 | -2.567175000 | 1.800189000  | 1.760101000  |
| 6 | -1.394586000 | -2.633185000 | 2.166968000  | 6 | -1.739971000 | -0.596172000 | 3.077426000  |
| 6 | -1.733382000 | -3.207394000 | -0.218712000 | 6 | -0.771655000 | -2.693490000 | 2.174839000  |
| 6 | -3.006678000 | -2.326387000 | -0.340994000 | 6 | -1.997485000 | -2.957597000 | 1.261926000  |
| 6 | -3.111156000 | -1.376122000 | 0.843985000  | 6 | -2.872250000 | -1.712381000 | 1.151971000  |
| 6 | -1.058379000 | -3.390132000 | 0.984413000  | 6 | -0.727626000 | -1.632036000 | 3.076493000  |
| 6 | 1.074099000  | -3.675913000 | -0.226274000 | 6 | 1.730224000  | -1.518756000 | 2.835842000  |
| 6 | 0.389934000  | -3.381602000 | -1.434842000 | 6 | 1.640983000  | -2.503280000 | 1.815861000  |
| 6 | -0.996153000 | -3.140667000 | -1.428128000 | 6 | 0.413285000  | -3.114661000 | 1.516689000  |
| 6 | 0.377615000  | -3.618690000 | 0.983304000  | 6 | 0.545210000  | -1.014999000 | 3.391456000  |
| 6 | 2.176846000  | -2.344810000 | 2.032118000  | 6 | 1.305888000  | 1.281257000  | 3.099515000  |
| 6 | 2.966289000  | -2.374863000 | 0.846330000  | 6 | 2.539391000  | 0.868949000  | 2.528191000  |
| 6 | 2.549879000  | -3.230069000 | -0.351785000 | 6 | 2.928094000  | -0.602355000 | 2.494405000  |
| 6 | 0.935019000  | -3.013644000 | 2.166517000  | 6 | 0.330250000  | 0.385600000  | 3.620564000  |
| 6 | 0.031062000  | -1.094673000 | 3.467576000  | 6 | -1.486377000 | 1.833709000  | 2.700293000  |
| 6 | 1.315699000  | -0.436051000 | 3.350191000  | 6 | -0.478356000 | 2.736955000  | 2.199565000  |
| 6 | 2.367048000  | -1.061992000 | 2.662641000  | 6 | 0.883234000  | 2.476653000  | 2.414812000  |
| 6 | -0.153178000 | -2.351431000 | 2.840951000  | 6 | -1.060856000 | 0.644203000  | 3.345092000  |
| 6 | -0.621493000 | 1.853139000  | 4.832768000  | 6 | -3.281617000 | 4.040738000  | 0.933025000  |
| 7 | -0.956124000 | 2.238937000  | 5.887431000  | 7 | -4.045674000 | 4.909876000  | 1.128047000  |

|   |              |              |              |   |              |              |              |
|---|--------------|--------------|--------------|---|--------------|--------------|--------------|
| 6 | -3.109069000 | 3.853696000  | 0.645701000  | 6 | -3.984208000 | 0.904137000  | -3.244116000 |
| 7 | -3.927623000 | 4.691667000  | 0.699985000  | 7 | -4.966767000 | 0.972348000  | -3.880538000 |
| 6 | 3.511020000  | -4.340045000 | -0.488841000 | 6 | 3.412849000  | -3.943310000 | -0.853366000 |
| 7 | 4.371612000  | -5.132205000 | -0.566114000 | 7 | 4.159843000  | -4.817305000 | -1.088007000 |
| 6 | -4.188856000 | -3.192854000 | -0.490861000 | 6 | 4.099538000  | -0.802171000 | 3.365348000  |
| 7 | -5.081736000 | -3.932562000 | -0.664153000 | 7 | 5.062124000  | -0.844571000 | 4.033258000  |
| 6 | 4.580318000  | 2.708310000  | 0.577902000  | 6 | -2.744208000 | -4.146391000 | 1.710017000  |
| 7 | 5.520427000  | 3.408176000  | 0.610470000  | 7 | -3.279167000 | -5.138268000 | 2.035451000  |
| 1 | -4.761759000 | 3.499318000  | -1.250449000 | 6 | 2.866345000  | 4.232820000  | -1.592139000 |
| 6 | -4.392174000 | 3.314446000  | -2.247582000 | 7 | 3.398331000  | 5.233919000  | -1.893387000 |
| 7 | -4.785613000 | 2.331563000  | -3.081334000 | 1 | 5.658971000  | -3.532622000 | -2.524765000 |
| 7 | -3.632702000 | 4.179418000  | -2.953296000 | 6 | 5.300924000  | -2.738936000 | -3.163376000 |
| 6 | -3.442127000 | 3.660675000  | -4.219814000 | 7 | 5.663045000  | -1.452223000 | -3.113211000 |
| 1 | -2.786153000 | 4.134501000  | -4.930536000 | 7 | 4.312962000  | -2.862873000 | -4.056432000 |
| 6 | -4.171166000 | 2.520334000  | -4.304909000 | 6 | 4.014531000  | -1.618109000 | -4.566615000 |
| 1 | -4.289564000 | 1.814241000  | -5.109372000 | 1 | 3.193985000  | -1.462849000 | -5.246613000 |
| 6 | -2.859622000 | 5.243943000  | -2.344461000 | 6 | 4.857298000  | -0.731466000 | -3.968825000 |
| 1 | -2.572582000 | 5.955014000  | -3.121007000 | 1 | 4.911719000  | 0.342299000  | -4.031871000 |
| 1 | -3.464637000 | 5.741685000  | -1.585233000 | 6 | 3.510201000  | -4.054264000 | -4.261873000 |
| 1 | -1.963992000 | 4.823672000  | -1.868503000 | 1 | 3.484443000  | -4.309140000 | -5.322703000 |
| 6 | -5.675923000 | 1.242887000  | -2.727989000 | 1 | 3.932115000  | -4.872159000 | -3.679734000 |
| 1 | -6.700191000 | 1.458575000  | -3.052362000 | 1 | 2.497939000  | -3.835776000 | -3.897242000 |
| 1 | -5.317654000 | 0.323967000  | -3.193352000 | 6 | 6.509216000  | -0.865988000 | -2.089264000 |
| 1 | -5.630583000 | 1.094868000  | -1.648571000 | 1 | 7.097582000  | -0.057362000 | -2.524384000 |
| 1 | 5.632148000  | -3.704538000 | 0.870353000  | 1 | 5.856904000  | -0.483125000 | -1.287783000 |
| 6 | 6.031872000  | -2.699664000 | 0.876296000  | 1 | 7.179432000  | -1.629582000 | -1.694938000 |
| 7 | 6.157287000  | -1.893194000 | 1.938867000  | 1 | -4.985199000 | -1.447028000 | -3.792379000 |
| 7 | 6.444651000  | -2.035181000 | -0.208228000 | 6 | -5.109224000 | -2.191241000 | -3.019434000 |
| 6 | 6.803443000  | -0.756586000 | 0.165357000  | 7 | -5.826798000 | -2.023148000 | -1.896145000 |
| 1 | 7.111024000  | -0.018187000 | -0.555916000 | 7 | -4.509239000 | -3.390937000 | -2.955035000 |
| 6 | 6.622005000  | -0.667364000 | 1.508774000  | 6 | -4.831510000 | -3.984139000 | -1.752203000 |
| 1 | 6.737126000  | 0.165988000  | 2.182533000  | 1 | -4.409638000 | -4.930370000 | -1.454245000 |
| 6 | 6.351210000  | -2.536948000 | -1.571641000 | 6 | -5.654200000 | -3.131832000 | -1.089733000 |
| 1 | 7.284611000  | -2.334872000 | -2.099371000 | 1 | -6.083007000 | -3.191837000 | -0.103052000 |
| 1 | 6.161327000  | -3.609920000 | -1.536179000 | 6 | -3.476374000 | -3.814262000 | -3.881309000 |
| 1 | 5.510422000  | -2.045315000 | -2.071407000 | 1 | -2.942744000 | -4.658873000 | -3.448048000 |
| 6 | 5.603601000  | -2.200552000 | 3.246944000  | 1 | -3.913164000 | -4.102509000 | -4.840988000 |
| 1 | 5.570503000  | -1.285857000 | 3.836110000  | 1 | -2.772294000 | -2.982472000 | -4.010794000 |
| 1 | 4.579565000  | -2.566084000 | 3.108346000  | 6 | -6.478948000 | -0.785889000 | -1.511881000 |
| 1 | 6.214681000  | -2.948402000 | 3.756770000  | 1 | -7.454811000 | -1.010028000 | -1.073119000 |
| 1 | 3.955593000  | 5.160393000  | -0.000832000 | 1 | -5.828692000 | -0.260350000 | -0.793418000 |
| 6 | 3.299222000  | 5.334581000  | -0.841880000 | 1 | -6.599101000 | -0.158818000 | -2.396247000 |
| 7 | 2.102168000  | 5.935593000  | -0.811721000 | 1 | 5.031526000  | 1.572821000  | 3.950301000  |
| 7 | 3.549183000  | 4.945331000  | -2.096307000 | 6 | 5.157336000  | 2.327415000  | 3.187479000  |
| 6 | 2.458958000  | 5.256133000  | -2.878969000 | 7 | 4.539347000  | 3.518004000  | 3.124674000  |
| 1 | 2.414805000  | 4.979074000  | -3.918675000 | 7 | 5.902907000  | 2.185291000  | 2.079730000  |
| 6 | 1.552736000  | 5.876569000  | -2.077115000 | 6 | 5.729622000  | 3.300585000  | 1.283263000  |
| 1 | 0.563840000  | 6.251767000  | -2.280146000 | 1 | 6.184903000  | 3.382527000  | 0.310466000  |
| 6 | 4.674983000  | 4.118366000  | -2.505865000 | 6 | 4.878021000  | 4.131248000  | 1.936889000  |
| 1 | 5.003991000  | 4.430666000  | -3.497507000 | 1 | 4.449169000  | 5.075199000  | 1.641586000  |
| 1 | 5.481432000  | 4.234610000  | -1.782760000 | 6 | 6.583235000  | 0.961765000  | 1.694882000  |
| 1 | 4.352037000  | 3.069402000  | -2.522040000 | 1 | 7.518024000  | 1.213847000  | 1.190157000  |
| 6 | 1.362573000  | 6.250048000  | 0.399379000  | 1 | 6.782780000  | 0.370012000  | 2.588268000  |
| 1 | 0.997222000  | 7.277876000  | 0.359671000  | 1 | 5.922890000  | 0.385485000  | 1.028382000  |
| 1 | 0.525433000  | 5.546563000  | 0.489252000  | 6 | 3.496117000  | 3.927433000  | 4.045706000  |

|   |              |              |              |   |              |              |              |
|---|--------------|--------------|--------------|---|--------------|--------------|--------------|
| 1 | 2.018721000  | 6.125542000  | 1.259398000  | 1 | 2.928348000  | 4.738833000  | 3.592413000  |
| 1 | -3.563031000 | -5.531274000 | -1.488061000 | 1 | 2.821517000  | 3.076561000  | 4.198976000  |
| 6 | -2.812701000 | -5.493833000 | -2.265664000 | 1 | 3.924910000  | 4.256553000  | 4.995773000  |
| 7 | -1.584547000 | -6.022118000 | -2.218461000 | 1 | 1.213325000  | 6.017067000  | -2.646138000 |
| 7 | -2.954722000 | -4.852289000 | -3.431019000 | 6 | 0.228836000  | 6.101538000  | -2.207686000 |
| 6 | -1.766574000 | -4.936742000 | -4.126213000 | 7 | -0.018718000 | 6.514082000  | -0.955334000 |
| 1 | -1.628009000 | -4.442596000 | -5.073156000 | 7 | -0.935426000 | 5.769055000  | -2.783699000 |
| 6 | -0.907022000 | -5.663783000 | -3.362516000 | 6 | -1.941405000 | 5.912904000  | -1.850745000 |
| 1 | 0.126721000  | -5.926715000 | -3.513781000 | 1 | -2.962188000 | 5.640407000  | -2.063769000 |
| 6 | -4.092392000 | -4.018506000 | -3.786123000 | 6 | -1.369861000 | 6.380392000  | -0.708933000 |
| 1 | -4.249537000 | -4.070689000 | -4.863607000 | 1 | -1.804121000 | 6.588025000  | 0.255865000  |
| 1 | -4.973593000 | -4.372334000 | -3.252892000 | 6 | -1.061912000 | 5.080701000  | -4.057191000 |
| 1 | -3.876785000 | -2.988504000 | -3.467404000 | 1 | -1.809906000 | 5.579181000  | -4.675990000 |
| 6 | -0.981987000 | -6.596750000 | -1.025262000 | 1 | -0.097898000 | 5.096636000  | -4.563805000 |
| 1 | -0.371817000 | -7.456331000 | -1.303983000 | 1 | -1.352411000 | 4.039246000  | -3.872023000 |
| 1 | -0.362235000 | -5.837916000 | -0.534980000 | 6 | 1.009515000  | 6.781965000  | 0.034053000  |
| 1 | -1.772741000 | -6.916049000 | -0.347882000 | 1 | 0.624595000  | 7.493534000  | 0.764408000  |
| 1 | -2.502815000 | 0.495654000  | 6.026869000  | 1 | 1.286632000  | 5.831295000  | 0.515505000  |
| 6 | -3.336287000 | 0.137151000  | 5.437748000  | 1 | 1.887104000  | 7.191924000  | -0.466073000 |
| 7 | -3.666560000 | -1.140042000 | 5.211561000  | 1 | -1.087948000 | -5.843202000 | 2.940135000  |
| 7 | -4.191330000 | 0.921399000  | 4.776894000  | 6 | -0.105833000 | -5.947841000 | 2.501679000  |
| 6 | -5.060254000 | 0.123736000  | 4.064656000  | 7 | 1.060911000  | -5.592136000 | 3.057794000  |
| 1 | -5.803615000 | 0.544264000  | 3.408961000  | 7 | 0.134768000  | -6.405418000 | 1.263681000  |
| 6 | -4.733344000 | -1.167824000 | 4.334814000  | 6 | 1.485619000  | -6.286065000 | 1.007593000  |
| 1 | -5.125419000 | -2.093961000 | 3.949413000  | 1 | 1.913668000  | -6.535542000 | 0.050274000  |
| 6 | -4.086070000 | 2.369727000  | 4.667775000  | 6 | 2.062321000  | -5.773966000 | 2.127506000  |
| 1 | -5.061896000 | 2.821958000  | 4.849499000  | 1 | 3.083595000  | -5.492656000 | 2.326768000  |
| 1 | -3.358951000 | 2.724445000  | 5.397954000  | 6 | -0.895569000 | -6.718379000 | 0.289704000  |
| 1 | -3.732064000 | 2.614715000  | 3.661071000  | 1 | -0.518303000 | -7.476673000 | -0.396632000 |
| 6 | -2.814270000 | -2.275751000 | 5.518529000  | 1 | -1.779893000 | -7.084858000 | 0.810716000  |
| 1 | -3.405034000 | -3.072580000 | 5.973189000  | 1 | -1.160280000 | -5.795010000 | -0.248354000 |
| 1 | -2.349276000 | -2.627485000 | 4.588694000  | 6 | 1.193724000  | -4.844434000 | 4.297133000  |
| 1 | -2.033237000 | -1.958165000 | 6.207836000  | 1 | 1.955846000  | -5.304993000 | 4.927679000  |
|   |              |              |              | 1 | 1.470456000  | -3.808614000 | 4.060657000  |
|   |              |              |              | 1 | 0.236458000  | -4.849275000 | 4.816500000  |
|   |              |              |              | 1 | -4.819502000 | 3.233910000  | 2.794440000  |
|   |              |              |              | 6 | -5.258292000 | 2.248500000  | 2.753469000  |
|   |              |              |              | 7 | -5.184169000 | 1.296100000  | 3.700647000  |
|   |              |              |              | 7 | -6.024218000 | 1.791966000  | 1.750509000  |
|   |              |              |              | 6 | -6.377406000 | 0.488710000  | 2.031495000  |
|   |              |              |              | 1 | -6.964844000 | -0.096611000 | 1.344115000  |
|   |              |              |              | 6 | -5.852549000 | 0.176179000  | 3.243888000  |
|   |              |              |              | 1 | -5.871872000 | -0.739749000 | 3.810111000  |
|   |              |              |              | 6 | -6.220938000 | 2.480108000  | 0.483702000  |
|   |              |              |              | 1 | -7.160943000 | 2.143518000  | 0.043316000  |
|   |              |              |              | 1 | -6.255550000 | 3.555307000  | 0.662597000  |
|   |              |              |              | 1 | -5.386723000 | 2.256611000  | -0.193271000 |
|   |              |              |              | 6 | -4.250011000 | 1.310722000  | 4.812323000  |
|   |              |              |              | 1 | -4.772771000 | 1.086575000  | 5.744683000  |
|   |              |              |              | 1 | -3.460635000 | 0.573548000  | 4.623453000  |
|   |              |              |              | 1 | -3.788815000 | 2.295422000  | 4.873561000  |

Cartesian coordinates of optimized geometry of dimers of  $(IM^+)_{n...}((C_{60}(CN)_n)^{n-})$  for  $n = 1$  to 3 at M06L/6-31G(d,p) level. Atomic number followed by X, Y, Z coordinates in Å.

| $[IM^+...((C_{60}(CN)^-)]_2$ |              |              |              | $[(IM^+)_2...((C_{60}(CN)_2)^{2-})]_2$ |               |              |              |
|------------------------------|--------------|--------------|--------------|----------------------------------------|---------------|--------------|--------------|
| 6                            | -4.966548000 | 1.916133000  | -3.069221000 | 7                                      | -6.029634000  | 4.085590000  | -3.537358000 |
| 6                            | -4.785057000 | 0.520093000  | -3.388048000 | 6                                      | -10.007802000 | 1.548928000  | -3.587971000 |
| 6                            | -3.950899000 | 2.616272000  | -2.413702000 | 6                                      | -7.626587000  | 0.791871000  | -1.253456000 |
| 6                            | -3.593227000 | -0.127626000 | -3.042022000 | 6                                      | -7.199297000  | -0.291301000 | -2.128203000 |
| 6                            | -3.617679000 | -1.467971000 | -2.505946000 | 6                                      | -6.834346000  | 1.905762000  | -1.019303000 |
| 6                            | -6.039602000 | -0.149639000 | -3.193906000 | 6                                      | -5.873312000  | -0.228473000 | -2.614831000 |
| 6                            | -6.046705000 | -1.439002000 | -2.648250000 | 6                                      | -5.054898000  | -1.429178000 | -2.639121000 |
| 6                            | -4.826645000 | -2.124238000 | -2.356411000 | 6                                      | -7.656498000  | -1.507048000 | -1.528596000 |
| 6                            | -5.604503000 | 3.720793000  | -0.966111000 | 6                                      | -6.845638000  | -2.658194000 | -1.530818000 |
| 6                            | -6.657459000 | 2.995107000  | -1.638630000 | 6                                      | -5.550451000  | -2.615072000 | -2.138437000 |
| 6                            | -4.273759000 | 3.539286000  | -1.353609000 | 6                                      | -7.504718000  | 1.932236000  | 1.353566000  |
| 6                            | -6.344723000 | 2.107935000  | -2.670484000 | 6                                      | -8.352852000  | 0.798982000  | 1.110105000  |
| 6                            | -7.011513000 | 0.828756000  | -2.749323000 | 6                                      | -6.732401000  | 2.445780000  | 0.298196000  |
| 6                            | -7.651036000 | 2.633947000  | -0.651275000 | 6                                      | -8.412834000  | 0.234121000  | -0.172333000 |
| 6                            | -8.294493000 | 1.397790000  | -0.731348000 | 6                                      | -8.429060000  | -1.192090000 | -0.338465000 |
| 6                            | -7.966431000 | 0.480700000  | -1.798325000 | 6                                      | -8.303359000  | -0.057016000 | 2.272119000  |
| 6                            | -3.571197000 | 3.524524000  | 1.008671000  | 6                                      | -8.309039000  | -1.444939000 | 2.107957000  |
| 6                            | -4.948425000 | 3.710294000  | 1.404302000  | 6                                      | -8.379606000  | -2.023668000 | 0.781722000  |
| 6                            | -3.238752000 | 3.432801000  | -0.345518000 | 6                                      | -4.812561000  | 2.739151000  | 1.813377000  |
| 6                            | -5.949526000 | 3.815539000  | 0.433921000  | 6                                      | -5.600115000  | 2.172188000  | 2.890274000  |
| 6                            | -7.210379000 | 3.137708000  | 0.629753000  | 6                                      | -5.360067000  | 2.857747000  | 0.527647000  |
| 6                            | -5.176185000 | 2.941594000  | 2.606114000  | 6                                      | -6.924739000  | 1.788504000  | 2.675158000  |
| 6                            | -6.393165000 | 2.284455000  | 2.792975000  | 6                                      | -7.412788000  | 0.552950000  | 3.236679000  |
| 6                            | -7.431673000 | 2.388414000  | 1.788327000  | 6                                      | -4.726246000  | 1.356026000  | 3.697330000  |
| 6                            | -1.672059000 | 1.588682000  | 0.131242000  | 6                                      | -5.195545000  | 0.156713000  | 4.239078000  |
| 6                            | -2.012214000 | 1.689777000  | 1.537565000  | 6                                      | -6.566648000  | -0.251083000 | 4.008411000  |
| 6                            | -2.264306000 | 2.462804000  | -0.793612000 | 6                                      | -3.304732000  | 2.086245000  | -0.518226000 |
| 6                            | -2.946507000 | 2.633803000  | 1.964921000  | 6                                      | -2.727776000  | 1.938277000  | 0.803488000  |
| 6                            | -3.940251000 | 2.275094000  | 2.954479000  | 6                                      | -4.585760000  | 2.607849000  | -0.646480000 |
| 6                            | -2.034787000 | 0.352860000  | 2.086295000  | 6                                      | -3.465504000  | 2.263209000  | 1.948338000  |
| 6                            | -2.995625000 | 0.006148000  | 3.037747000  | 6                                      | -3.401904000  | 1.409521000  | 3.112507000  |
| 6                            | -3.965910000 | 0.983309000  | 3.478610000  | 6                                      | -1.889866000  | 0.771138000  | 0.788059000  |
| 6                            | -2.544784000 | 0.594402000  | -2.372863000 | 6                                      | -1.825103000  | -0.057864000 | 1.913671000  |
| 6                            | -1.914076000 | -0.304960000 | -1.422859000 | 6                                      | -2.603801000  | 0.265295000  | 3.090261000  |
| 6                            | -2.713642000 | 1.946996000  | -2.066509000 | 6                                      | -5.021429000  | 0.885337000  | -2.453788000 |
| 6                            | -1.473911000 | 0.203661000  | -0.187650000 | 6                                      | -3.692578000  | 0.408333000  | -2.261847000 |
| 6                            | -1.714549000 | -0.561092000 | 1.012840000  | 6                                      | -5.517661000  | 2.164303000  | -1.796335000 |
| 6                            | -2.535777000 | -1.591891000 | -1.526839000 | 6                                      | -2.769499000  | 1.045654000  | -1.381339000 |
| 6                            | -2.831358000 | -2.298460000 | -0.344045000 | 6                                      | -1.957125000  | 0.205028000  | -0.548424000 |
| 6                            | -2.367941000 | -1.789120000 | 0.939211000  | 6                                      | -3.670638000  | -1.017651000 | -2.458600000 |
| 6                            | -5.039295000 | -1.092987000 | 3.363609000  | 6                                      | -2.872206000  | -1.818392000 | -1.622220000 |
| 6                            | -3.667038000 | -1.271984000 | 2.960089000  | 6                                      | -1.953445000  | -1.194351000 | -0.682139000 |
| 6                            | -3.351142000 | -2.150101000 | 1.921166000  | 6                                      | -2.603633000  | -2.054945000 | 2.835197000  |
| 6                            | -6.044933000 | -1.805025000 | 2.685841000  | 6                                      | -1.823126000  | -1.491149000 | 1.764028000  |
| 6                            | -7.464497000 | 0.217537000  | 2.658659000  | 6                                      | -1.911006000  | -2.032248000 | 0.474741000  |
| 6                            | -6.424667000 | 0.949614000  | 3.343428000  | 6                                      | -3.436744000  | -3.155954000 | 2.571151000  |
| 6                            | -5.229321000 | 0.301404000  | 3.672089000  | 6                                      | -5.217317000  | -2.157618000 | 3.972702000  |
| 6                            | -7.279646000 | -1.127241000 | 2.334354000  | 6                                      | -4.363648000  | -1.022846000 | 4.231184000  |
| 6                            | -8.333482000 | -0.771698000 | 0.139946000  | 6                                      | -3.086407000  | -0.974032000 | 3.658487000  |



|   |              |              |              |   |               |              |              |
|---|--------------|--------------|--------------|---|---------------|--------------|--------------|
| 6 | -8.523489000 | 0.620981000  | 0.468349000  | 6 | -4.765428000  | -3.194034000 | 3.149767000  |
| 6 | -8.090979000 | 1.108225000  | 1.703351000  | 6 | -6.972653000  | -3.353853000 | 2.073358000  |
| 6 | -7.717846000 | -1.629039000 | 1.058615000  | 6 | -7.444982000  | -2.276411000 | 2.911834000  |
| 6 | -6.463252000 | -2.724637000 | -0.733143000 | 6 | -6.576231000  | -1.681852000 | 3.834801000  |
| 6 | -7.040766000 | -1.802830000 | -1.662085000 | 6 | -5.653924000  | -3.801930000 | 2.195291000  |
| 6 | -7.991946000 | -0.861183000 | -1.251156000 | 6 | -5.459256000  | -4.028402000 | -0.231595000 |
| 6 | -6.758004000 | -2.610216000 | 0.613451000  | 6 | -6.784705000  | -3.500951000 | -0.364859000 |
| 6 | -4.401611000 | -2.879342000 | 1.226328000  | 6 | -7.561685000  | -3.212277000 | 0.770297000  |
| 6 | -4.022943000 | -3.038711000 | -0.138805000 | 6 | -4.882790000  | -4.130293000 | 1.018976000  |
| 6 | -5.071609000 | -3.165678000 | -1.239458000 | 6 | -2.773839000  | -3.179019000 | 0.213872000  |
| 6 | -5.731372000 | -2.743156000 | 1.648651000  | 6 | -3.277191000  | -3.082556000 | -1.117879000 |
| 7 | -4.874027000 | -5.638446000 | -2.138610000 | 6 | -4.634375000  | -3.678374000 | -1.488395000 |
| 6 | -5.036793000 | -4.540851000 | -1.768282000 | 6 | -3.489541000  | -3.757133000 | 1.269858000  |
| 6 | -2.124360000 | -5.427320000 | -0.503265000 | 7 | -4.198033000  | -5.697857000 | -3.131581000 |
| 7 | -1.576270000 | -5.241002000 | 0.701513000  | 6 | -4.446043000  | -4.831892000 | -2.384786000 |
| 7 | -1.310387000 | -4.901770000 | -1.421992000 | 6 | -5.753728000  | 3.242491000  | -2.773582000 |
| 6 | -0.224024000 | -4.338697000 | -0.785484000 | 6 | -8.959431000  | 3.624397000  | -2.727526000 |
| 1 | 0.558564000  | -3.830092000 | -1.330103000 | 7 | -9.810605000  | 2.601833000  | -2.602126000 |
| 6 | -0.389559000 | -4.554932000 | 0.547259000  | 7 | -8.893945000  | 4.264752000  | -1.557251000 |
| 1 | 0.221336000  | -4.263587000 | 1.386796000  | 6 | -9.706128000  | 3.619302000  | -0.651552000 |
| 1 | -3.071106000 | -5.905181000 | -0.716781000 | 1 | -9.775972000  | 3.935402000  | 0.375967000  |
| 6 | -1.600500000 | -4.820334000 | -2.847157000 | 6 | -10.277279000 | 2.572009000  | -1.306203000 |
| 1 | -0.768255000 | -5.236931000 | -3.415482000 | 1 | -10.938739000 | 1.796166000  | -0.958704000 |
| 1 | -2.513814000 | -5.378830000 | -3.051970000 | 6 | -7.992563000  | 5.364339000  | -1.246020000 |
| 1 | -1.749359000 | -3.771437000 | -3.115732000 | 1 | -7.278994000  | 5.020479000  | -0.490966000 |
| 6 | -2.205579000 | -5.579252000 | 1.968162000  | 1 | -7.446840000  | 5.639317000  | -2.147087000 |
| 1 | -1.541481000 | -6.214347000 | 2.555730000  | 1 | -8.562430000  | 6.212799000  | -0.865427000 |
| 1 | -2.430607000 | -4.660228000 | 2.514348000  | 1 | -9.344948000  | 0.709371000  | -3.347264000 |
| 1 | -3.137115000 | -6.107383000 | 1.770543000  | 1 | -8.364106000  | 3.865195000  | -3.596509000 |
| 6 | 7.634381000  | -0.178839000 | -2.248095000 | 1 | -11.048697000 | 1.227372000  | -3.569155000 |
| 6 | 7.299408000  | 1.206520000  | -2.019991000 | 1 | -9.766597000  | 1.934319000  | -4.577518000 |
| 6 | 6.734369000  | -1.008430000 | -2.920116000 | 6 | -1.456410000  | -4.089080000 | -3.399136000 |
| 6 | 6.076630000  | 1.713212000  | -2.474367000 | 7 | -1.820163000  | -3.243222000 | -4.368170000 |
| 6 | 5.307945000  | 2.615009000  | -1.650025000 | 7 | -0.355543000  | -3.613030000 | -2.812399000 |
| 6 | 7.782081000  | 1.575662000  | -0.719644000 | 6 | -0.022068000  | -2.411482000 | -3.400152000 |
| 6 | 7.011943000  | 2.431725000  | 0.077006000  | 1 | 0.817608000   | -1.830079000 | -3.047882000 |
| 6 | 5.795232000  | 2.999284000  | -0.413247000 | 6 | -0.942495000  | -2.179754000 | -4.374030000 |
| 6 | 7.174058000  | -2.827793000 | -1.325520000 | 1 | -1.063003000  | -1.353112000 | -5.053741000 |
| 6 | 8.101982000  | -1.970169000 | -0.623564000 | 6 | 0.267428000   | -4.185078000 | -1.626575000 |
| 6 | 6.506564000  | -2.355824000 | -2.458912000 | 1 | -0.015881000  | -3.593399000 | -0.751404000 |
| 6 | 8.327684000  | -0.668977000 | -1.075605000 | 1 | -0.082898000  | -5.209007000 | -1.504266000 |
| 6 | 8.421422000  | 0.417721000  | -0.128014000 | 1 | 1.353098000   | -4.169582000 | -1.739435000 |
| 6 | 7.964903000  | -2.228842000 | 0.793153000  | 6 | -3.030425000  | -3.352900000 | -5.168900000 |
| 6 | 8.057550000  | -1.176945000 | 1.706262000  | 1 | -3.779385000  | -2.656401000 | -4.779047000 |
| 6 | 8.288828000  | 0.168932000  | 1.235096000  | 1 | -1.981782000  | -4.998861000 | -3.145227000 |
| 6 | 4.423252000  | -3.426149000 | -1.702750000 | 1 | -2.798736000  | -3.112815000 | -6.207154000 |
| 6 | 5.114831000  | -3.908121000 | -0.528918000 | 1 | -3.415056000  | -4.369283000 | -5.093836000 |
| 6 | 5.101556000  | -2.655201000 | -2.648017000 | 7 | 4.053337000   | 6.117575000  | -0.113958000 |
| 6 | 6.470783000  | -3.622678000 | -0.345030000 | 6 | 0.847247000   | 3.924880000  | -2.923928000 |
| 6 | 6.952702000  | -3.246277000 | 0.964072000  | 6 | 2.788556000   | 2.060176000  | -0.792033000 |
| 6 | 4.201949000  | -3.845010000 | 0.589530000  | 6 | 3.681175000   | 1.751620000  | -1.903115000 |
| 6 | 4.666843000  | -3.477704000 | 1.853656000  | 6 | 3.197653000   | 2.827493000  | 0.286907000  |
| 6 | 6.071128000  | -3.179392000 | 2.046551000  | 6 | 5.029968000   | 2.151547000  | -1.764129000 |
| 6 | 3.171103000  | -1.137789000 | -2.859228000 | 6 | 6.095198000   | 1.247212000  | -2.166535000 |
| 6 | 2.465652000  | -1.937101000 | -1.876541000 | 6 | 3.400837000   | 0.407726000  | -2.297146000 |

|   |              |              |              |   |             |              |              |
|---|--------------|--------------|--------------|---|-------------|--------------|--------------|
| 6 | 4.466760000  | -1.503102000 | -3.244853000 | 6 | 4.441719000 | -0.472071000 | -2.660140000 |
| 6 | 3.081979000  | -3.054825000 | -1.309041000 | 6 | 5.798742000 | -0.015092000 | -2.636000000 |
| 6 | 2.944992000  | -3.315017000 | 0.109298000  | 6 | 1.955449000 | 1.374588000  | 1.843938000  |
| 6 | 1.686651000  | -1.043271000 | -1.048609000 | 6 | 1.506140000 | 0.593011000  | 0.727456000  |
| 6 | 1.556841000  | -1.292829000 | 0.319363000  | 6 | 2.822586000 | 2.454135000  | 1.612949000  |
| 6 | 2.197805000  | -2.446769000 | 0.908615000  | 6 | 1.913840000 | 0.929106000  | -0.570996000 |
| 6 | 5.152376000  | 0.859931000  | -3.172654000 | 6 | 2.295925000 | -0.097971000 | -1.497713000 |
| 6 | 3.805618000  | 1.241495000  | -2.785299000 | 6 | 1.465582000 | -0.789358000 | 1.137039000  |
| 6 | 5.473392000  | -0.479744000 | -3.399304000 | 6 | 1.840632000 | -1.789132000 | 0.236475000  |
| 6 | 2.823664000  | 0.242817000  | -2.647227000 | 6 | 2.260991000 | -1.437816000 | -1.103956000 |
| 6 | 1.921808000  | 0.303948000  | -1.521825000 | 6 | 4.156166000 | 1.841653000  | 3.589991000  |
| 6 | 3.886549000  | 2.348418000  | -1.877901000 | 6 | 3.282008000 | 0.705305000  | 3.801445000  |
| 6 | 3.046510000  | 2.367098000  | -0.747455000 | 6 | 3.944008000 | 2.697289000  | 2.499911000  |
| 6 | 2.021355000  | 1.343957000  | -0.597061000 | 6 | 2.193449000 | 0.478949000  | 2.959371000  |
| 6 | 2.329693000  | -0.689749000 | 2.447766000  | 6 | 1.896677000 | -0.861577000 | 2.515988000  |
| 6 | 1.651009000  | -0.208072000 | 1.271648000  | 6 | 4.093097000 | -0.398313000 | 4.257579000  |
| 6 | 1.882261000  | 1.088834000  | 0.809099000  | 6 | 3.809049000 | -1.696779000 | 3.828583000  |
| 6 | 3.235341000  | 0.163252000  | 3.104959000  | 6 | 2.687073000 | -1.934236000 | 2.942035000  |
| 6 | 4.818642000  | -1.717540000 | 3.376100000  | 6 | 6.324523000 | 2.813329000  | 2.016863000  |
| 6 | 3.893387000  | -2.587540000 | 2.688059000  | 6 | 6.561523000 | 1.914053000  | 3.127839000  |
| 6 | 2.679788000  | -2.068640000 | 2.222451000  | 6 | 5.032030000 | 3.244962000  | 1.753419000  |
| 6 | 4.499461000  | -0.373839000 | 3.576679000  | 6 | 5.497840000 | 1.439696000  | 3.902263000  |
| 6 | 6.809255000  | 0.281905000  | 3.040808000  | 6 | 5.466463000 | 0.055632000  | 4.317303000  |
| 6 | 7.143043000  | -1.105829000 | 2.826095000  | 6 | 7.630969000 | 1.030632000  | 2.754137000  |
| 6 | 6.163315000  | -2.087918000 | 2.984840000  | 6 | 7.606588000 | -0.308410000 | 3.153620000  |
| 6 | 5.506843000  | 0.639765000  | 3.407083000  | 6 | 6.499131000 | -0.804598000 | 3.943280000  |
| 6 | 5.569997000  | 2.577569000  | 1.918882000  | 6 | 5.508829000 | 2.968653000  | -0.719359000 |
| 6 | 6.874943000  | 2.174156000  | 1.494062000  | 6 | 6.817450000 | 2.526225000  | -0.369078000 |
| 6 | 7.512041000  | 1.066957000  | 2.066156000  | 6 | 4.563182000 | 3.561010000  | 0.314549000  |
| 6 | 4.874751000  | 1.799069000  | 2.825198000  | 6 | 7.291437000 | 2.522789000  | 0.969582000  |
| 6 | 2.819818000  | 1.963217000  | 1.498890000  | 6 | 8.048308000 | 1.395063000  | 1.410499000  |
| 6 | 3.454212000  | 2.807353000  | 0.539821000  | 6 | 7.239240000 | 1.517461000  | -1.308748000 |
| 6 | 4.865951000  | 3.341696000  | 0.775611000  | 6 | 7.961629000 | 0.408291000  | -0.844896000 |
| 6 | 3.448093000  | 1.510542000  | 2.668920000  | 6 | 8.428619000 | 0.366092000  | 0.526975000  |
| 7 | 4.686189000  | 5.954126000  | 1.107271000  | 6 | 7.135390000 | -2.486615000 | 2.451096000  |
| 6 | 4.818525000  | 4.797032000  | 1.000096000  | 6 | 7.999810000 | -1.355181000 | 2.239850000  |
| 6 | 1.942910000  | 5.432256000  | -0.367568000 | 6 | 8.378865000 | -1.001194000 | 0.939148000  |
| 7 | 0.769676000  | 4.796873000  | -0.315247000 | 6 | 6.695514000 | -3.233638000 | 1.343055000  |
| 7 | 2.353552000  | 5.460406000  | -1.638620000 | 6 | 4.425104000 | -3.367236000 | 2.324233000  |
| 6 | 1.424887000  | 4.801143000  | -2.415508000 | 6 | 4.878017000 | -2.591221000 | 3.454909000  |
| 1 | 1.562699000  | 4.673457000  | -3.476240000 | 6 | 6.205948000 | -2.150231000 | 3.502802000  |
| 6 | 0.430611000  | 4.383953000  | -1.586098000 | 6 | 5.314136000 | -3.668725000 | 1.286506000  |
| 1 | -0.470364000 | 3.815888000  | -1.768357000 | 6 | 3.567517000 | -3.225531000 | -0.388488000 |
| 1 | 2.489396000  | 5.848452000  | 0.467365000  | 6 | 2.643903000 | -2.904758000 | 0.676391000  |
| 6 | 3.627784000  | 5.996306000  | -2.097183000 | 6 | 3.074096000 | -2.962075000 | 2.009164000  |
| 1 | 3.459718000  | 6.672534000  | -2.936031000 | 6 | 4.879208000 | -3.602930000 | -0.083260000 |
| 1 | 4.102198000  | 6.529048000  | -1.273717000 | 6 | 5.742382000 | -2.295319000 | -1.966042000 |
| 1 | 4.271280000  | 5.168091000  | -2.405758000 | 6 | 4.407971000 | -1.846276000 | -2.235869000 |
| 6 | 0.068931000  | 4.452144000  | 0.913979000  | 6 | 3.317124000 | -2.343506000 | -1.497674000 |
| 1 | -1.004683000 | 4.591505000  | 0.774397000  | 6 | 5.982523000 | -3.113876000 | -0.877866000 |
| 1 | 0.272937000  | 3.408255000  | 1.167508000  | 6 | 7.923062000 | -1.786318000 | -0.202346000 |
| 1 | 0.423669000  | 5.098440000  | 1.715594000  | 6 | 7.775822000 | -0.919176000 | -1.326245000 |
|   |              |              |              | 6 | 6.749448000 | -1.216509000 | -2.419054000 |
|   |              |              |              | 6 | 7.129001000 | -2.920797000 | 0.011490000  |
|   |              |              |              | 7 | 8.156312000 | -1.737319000 | -4.590542000 |

|                                                                                            |   |              |              |              |
|--------------------------------------------------------------------------------------------|---|--------------|--------------|--------------|
|                                                                                            | 6 | 7.471800000  | -1.554080000 | -3.658590000 |
|                                                                                            | 6 | 4.325983000  | 4.999438000  | 0.096497000  |
|                                                                                            | 6 | 1.182822000  | 5.104346000  | -0.767038000 |
|                                                                                            | 7 | 0.572766000  | 4.182793000  | -1.519771000 |
|                                                                                            | 7 | 0.799092000  | 4.927838000  | 0.500536000  |
|                                                                                            | 6 | -0.060853000 | 3.852644000  | 0.560442000  |
|                                                                                            | 1 | -0.492247000 | 3.508316000  | 1.486822000  |
|                                                                                            | 6 | -0.198891000 | 3.379624000  | -0.708873000 |
|                                                                                            | 1 | -0.770708000 | 2.549933000  | -1.105724000 |
|                                                                                            | 6 | 1.308201000  | 5.664767000  | 1.646747000  |
|                                                                                            | 1 | 1.877657000  | 4.977069000  | 2.278925000  |
|                                                                                            | 1 | 1.972686000  | 6.452904000  | 1.296393000  |
|                                                                                            | 1 | 0.476068000  | 6.085617000  | 2.212318000  |
|                                                                                            | 1 | 1.630561000  | 3.162666000  | -3.002166000 |
|                                                                                            | 1 | 1.911456000  | 5.830321000  | -1.096886000 |
|                                                                                            | 1 | -0.065843000 | 3.574683000  | -3.404678000 |
|                                                                                            | 1 | 1.180977000  | 4.844309000  | -3.403465000 |
|                                                                                            | 6 | 10.281754000 | -0.132000000 | -2.730799000 |
|                                                                                            | 7 | 10.032922000 | 1.109539000  | -3.159412000 |
|                                                                                            | 7 | 10.985101000 | -0.053570000 | -1.594359000 |
|                                                                                            | 6 | 11.151825000 | 1.276283000  | -1.269416000 |
|                                                                                            | 1 | 11.649719000 | 1.578425000  | -0.363336000 |
|                                                                                            | 6 | 10.552322000 | 2.005220000  | -2.246722000 |
|                                                                                            | 1 | 10.420977000 | 3.068215000  | -2.358961000 |
|                                                                                            | 6 | 11.352372000 | -1.198550000 | -0.777292000 |
|                                                                                            | 1 | 11.410028000 | -0.881279000 | 0.262891000  |
|                                                                                            | 1 | 10.561970000 | -1.947757000 | -0.859408000 |
|                                                                                            | 1 | 12.309593000 | -1.614326000 | -1.098821000 |
|                                                                                            | 6 | 9.180455000  | 1.442715000  | -4.291842000 |
|                                                                                            | 1 | 8.192939000  | 1.730859000  | -3.918324000 |
|                                                                                            | 1 | 9.962225000  | -1.033672000 | -3.234489000 |
|                                                                                            | 1 | 9.628039000  | 2.264956000  | -4.850970000 |
|                                                                                            | 1 | 9.079442000  | 0.563474000  | -4.927759000 |
| [[IM*] <sub>3</sub> ...((C <sub>60</sub> (CN) <sub>3</sub> ) <sup>3-</sup> )] <sub>2</sub> |   |              |              |              |
|                                                                                            | 6 | 8.147446000  | -0.258931000 | -2.162956000 |
|                                                                                            | 6 | 7.664398000  | 0.981670000  | -2.727072000 |
|                                                                                            | 6 | 7.395560000  | -1.429744000 | -2.312300000 |
|                                                                                            | 6 | 6.443816000  | 0.996080000  | -3.413969000 |
|                                                                                            | 6 | 5.523615000  | 2.096738000  | -3.233626000 |
|                                                                                            | 6 | 7.988110000  | 2.041992000  | -1.817395000 |
|                                                                                            | 6 | 7.069574000  | 3.090597000  | -1.629552000 |
|                                                                                            | 6 | 5.856978000  | 3.141997000  | -2.382956000 |
|                                                                                            | 6 | 7.898508000  | -2.084117000 | -0.000234000 |
|                                                                                            | 6 | 8.592556000  | -0.853722000 | 0.168674000  |
|                                                                                            | 6 | 7.262984000  | -2.361145000 | -1.210233000 |
|                                                                                            | 6 | 8.786417000  | 0.035728000  | -0.907175000 |
|                                                                                            | 6 | 8.674078000  | 1.464325000  | -0.682058000 |
|                                                                                            | 6 | 8.362812000  | -0.352785000 | 1.506060000  |
|                                                                                            | 6 | 8.309533000  | 1.039354000  | 1.720897000  |
|                                                                                            | 6 | 8.436389000  | 1.949566000  | 0.598850000  |
|                                                                                            | 6 | 5.269363000  | -3.100650000 | -0.044682000 |
|                                                                                            | 6 | 5.847358000  | -2.889002000 | 1.217025000  |
|                                                                                            | 6 | 5.943941000  | -2.959356000 | -1.276290000 |

|   |              |              |              |
|---|--------------|--------------|--------------|
| 6 | 7.316630000  | -2.537794000 | 1.362988000  |
| 6 | 7.509436000  | -1.256885000 | 2.200642000  |
| 6 | 4.843264000  | -2.304979000 | 2.053317000  |
| 6 | 5.149956000  | -1.330767000 | 3.033506000  |
| 6 | 6.481197000  | -0.759243000 | 2.999740000  |
| 6 | 3.888012000  | -2.006343000 | -2.285573000 |
| 6 | 3.156608000  | -2.275190000 | -1.076726000 |
| 6 | 5.256607000  | -2.344862000 | -2.385989000 |
| 6 | 3.845277000  | -2.752420000 | 0.052445000  |
| 6 | 3.579869000  | -2.354655000 | 1.378376000  |
| 6 | 2.253272000  | -1.149891000 | -0.858124000 |
| 6 | 1.969445000  | -0.659668000 | 0.407108000  |
| 6 | 2.473926000  | -1.356641000 | 1.689784000  |
| 6 | 5.682685000  | -0.212367000 | -3.591803000 |
| 6 | 4.286579000  | 0.126057000  | -3.502218000 |
| 6 | 6.149706000  | -1.418893000 | -3.032474000 |
| 6 | 3.411194000  | -0.764095000 | -2.849640000 |
| 6 | 2.407661000  | -0.237148000 | -1.966394000 |
| 6 | 4.168902000  | 1.555490000  | -3.315959000 |
| 6 | 3.230209000  | 2.050211000  | -2.401170000 |
| 6 | 2.307666000  | 1.141838000  | -1.751969000 |
| 6 | 2.568694000  | 1.056175000  | 1.892047000  |
| 6 | 1.941887000  | 0.750713000  | 0.625443000  |
| 6 | 2.064542000  | 1.648171000  | -0.440073000 |
| 6 | 3.276873000  | 2.269498000  | 2.047181000  |
| 6 | 4.996695000  | 1.014446000  | 3.301098000  |
| 6 | 4.235740000  | -0.209308000 | 3.160587000  |
| 6 | 3.012328000  | -0.151062000 | 2.492352000  |
| 6 | 4.526737000  | 2.225200000  | 2.755769000  |
| 6 | 6.797642000  | 2.794925000  | 2.010644000  |
| 6 | 7.282944000  | 1.553051000  | 2.576346000  |
| 6 | 6.382392000  | 0.675384000  | 3.197592000  |
| 6 | 5.438547000  | 3.119421000  | 2.098910000  |
| 6 | 5.457655000  | 3.994044000  | -0.192918000 |
| 6 | 6.823777000  | 3.594585000  | -0.300655000 |
| 6 | 7.516076000  | 3.049682000  | 0.798105000  |
| 6 | 4.752663000  | 3.717962000  | 0.972699000  |
| 6 | 2.845936000  | 2.873082000  | -0.289762000 |
| 6 | 3.476447000  | 3.156399000  | -1.527351000 |
| 6 | 4.791231000  | 3.929882000  | -1.585986000 |
| 6 | 3.385642000  | 3.217316000  | 0.960531000  |
| 7 | 4.134011000  | 6.242153000  | -2.678587000 |
| 6 | 4.504748000  | 5.252139000  | -2.174157000 |
| 6 | 1.414355000  | 4.504625000  | -3.072590000 |
| 7 | 0.367471000  | 3.878903000  | -2.521673000 |
| 7 | 1.625215000  | 3.987387000  | -4.286635000 |
| 6 | 0.714992000  | 2.970076000  | -4.495095000 |
| 1 | 0.725554000  | 2.376903000  | -5.394004000 |
| 6 | -0.077869000 | 2.902825000  | -3.393015000 |
| 1 | -0.901069000 | 2.252715000  | -3.139011000 |
| 1 | 1.995555000  | 5.305652000  | -2.636761000 |
| 6 | 2.765062000  | 4.309640000  | -5.132552000 |
| 1 | 2.436999000  | 4.385441000  | -6.169991000 |
| 1 | 3.191773000  | 5.256969000  | -4.802056000 |
| 1 | 3.516580000  | 3.521062000  | -5.028421000 |

|   |              |              |              |
|---|--------------|--------------|--------------|
| 6 | -0.122707000 | 4.123725000  | -1.174991000 |
| 1 | -1.190901000 | 4.357116000  | -1.199330000 |
| 1 | 0.022787000  | 3.224784000  | -0.568023000 |
| 1 | 0.455227000  | 4.942490000  | -0.743604000 |
| 7 | 8.828803000  | -4.537342000 | 2.202773000  |
| 1 | 10.697695000 | -4.012497000 | 0.983997000  |
| 6 | 8.130910000  | -3.654837000 | 1.877775000  |
| 6 | 10.699272000 | -3.605056000 | -0.017041000 |
| 7 | 11.239381000 | -2.445867000 | -0.404428000 |
| 7 | 10.061250000 | -4.143072000 | -1.058948000 |
| 6 | 10.170423000 | -3.287667000 | -2.133594000 |
| 1 | 9.680054000  | -3.488002000 | -3.071435000 |
| 6 | 10.912114000 | -2.223282000 | -1.724441000 |
| 1 | 11.186377000 | -1.313546000 | -2.231600000 |
| 6 | 9.174632000  | -5.296496000 | -0.994565000 |
| 1 | 9.448008000  | -6.016277000 | -1.767107000 |
| 1 | 9.250654000  | -5.744846000 | -0.005127000 |
| 1 | 8.148174000  | -4.944483000 | -1.148183000 |
| 6 | 11.878587000 | -1.477260000 | 0.470971000  |
| 1 | 12.912191000 | -1.312271000 | 0.163063000  |
| 1 | 11.312491000 | -0.542770000 | 0.419454000  |
| 1 | 11.852601000 | -1.850830000 | 1.493590000  |
| 7 | 0.567785000  | -2.525661000 | 3.097925000  |
| 1 | -0.221866000 | -0.168251000 | 4.104029000  |
| 6 | 1.387631000  | -1.996775000 | 2.449646000  |
| 6 | 0.576190000  | 0.424205000  | 4.539345000  |
| 7 | 0.802070000  | 1.719184000  | 4.294027000  |
| 7 | 1.529509000  | -0.015328000 | 5.368845000  |
| 6 | 2.406330000  | 1.016080000  | 5.624520000  |
| 1 | 3.290525000  | 0.873858000  | 6.222965000  |
| 6 | 1.946068000  | 2.104995000  | 4.952780000  |
| 1 | 2.356202000  | 3.094620000  | 4.841062000  |
| 6 | 1.738444000  | -1.394296000 | 5.780893000  |
| 1 | 1.863689000  | -1.434035000 | 6.863896000  |
| 1 | 0.886789000  | -1.995168000 | 5.469305000  |
| 1 | 2.636317000  | -1.773903000 | 5.283921000  |
| 6 | 0.065739000  | 2.539117000  | 3.341540000  |
| 1 | -0.800342000 | 3.006376000  | 3.817067000  |
| 1 | 0.753125000  | 3.291397000  | 2.948311000  |
| 1 | -0.261339000 | 1.909280000  | 2.512381000  |
| 6 | -1.483494000 | -1.266976000 | 0.543113000  |
| 6 | -1.489216000 | 0.002836000  | 1.235635000  |
| 6 | -1.649847000 | -1.300340000 | -0.846128000 |
| 6 | -1.669164000 | 1.185230000  | 0.504075000  |
| 6 | -2.506187000 | 2.245609000  | 1.025880000  |
| 6 | -2.163076000 | -0.171001000 | 2.493644000  |
| 6 | -3.003330000 | 0.857985000  | 2.972086000  |
| 6 | -3.129940000 | 2.085983000  | 2.259607000  |
| 6 | -3.104497000 | -3.259560000 | -0.651396000 |
| 6 | -2.992199000 | -3.177276000 | 0.767343000  |
| 6 | -2.478534000 | -2.314388000 | -1.456495000 |
| 6 | -2.155774000 | -2.225539000 | 1.371454000  |
| 6 | -2.587617000 | -1.552852000 | 2.578938000  |
| 6 | -4.262946000 | -3.521410000 | 1.366578000  |
| 6 | -4.656552000 | -2.890576000 | 2.566728000  |

|   |              |              |              |
|---|--------------|--------------|--------------|
| 6 | -3.813667000 | -1.871628000 | 3.150882000  |
| 6 | -4.483278000 | -2.067156000 | -2.806974000 |
| 6 | -5.170796000 | -3.048437000 | -2.070711000 |
| 6 | -3.129067000 | -1.732261000 | -2.620503000 |
| 6 | -4.467030000 | -3.892625000 | -1.023604000 |
| 6 | -5.193970000 | -3.829060000 | 0.337672000  |
| 6 | -6.500401000 | -2.564152000 | -1.877328000 |
| 6 | -7.236781000 | -2.818351000 | -0.688584000 |
| 6 | -6.506028000 | -3.363210000 | 0.434956000  |
| 6 | -3.674562000 | 0.650525000  | -3.035253000 |
| 6 | -5.026733000 | 0.302461000  | -3.355052000 |
| 6 | -2.735293000 | -0.349905000 | -2.676620000 |
| 6 | -5.451895000 | -1.026026000 | -3.187130000 |
| 6 | -6.709195000 | -1.396222000 | -2.675199000 |
| 6 | -5.886482000 | 1.340141000  | -2.797058000 |
| 6 | -7.125960000 | 1.059654000  | -2.242352000 |
| 6 | -7.750615000 | -0.350855000 | -2.312778000 |
| 6 | -1.812407000 | 1.153692000  | -0.926845000 |
| 6 | -2.763545000 | 2.172976000  | -1.294087000 |
| 6 | -1.816901000 | -0.086012000 | -1.600357000 |
| 6 | -3.673635000 | 1.917547000  | -2.336917000 |
| 6 | -5.038695000 | 2.337486000  | -2.185084000 |
| 6 | -3.165654000 | 2.890744000  | -0.101792000 |
| 6 | -4.519209000 | 3.228115000  | 0.062409000  |
| 6 | -5.455542000 | 2.991479000  | -1.018432000 |
| 6 | -8.201230000 | 0.725473000  | -0.180303000 |
| 6 | -7.512826000 | 1.682637000  | -1.016592000 |
| 6 | -6.713580000 | 2.669558000  | -0.425826000 |
| 6 | -8.056413000 | 0.801914000  | 1.223129000  |
| 6 | -7.863924000 | -1.660254000 | 1.277137000  |
| 6 | -8.013830000 | -1.711771000 | -0.160130000 |
| 6 | -8.232933000 | -0.525462000 | -0.853978000 |
| 6 | -7.875852000 | -0.423148000 | 1.952145000  |
| 6 | -6.020498000 | -1.174400000 | 3.379041000  |
| 6 | -6.013159000 | -2.449080000 | 2.688865000  |
| 6 | -6.919575000 | -2.674518000 | 1.644123000  |
| 6 | -6.937811000 | -0.180507000 | 3.013573000  |
| 6 | -5.221178000 | 1.550474000  | 3.262386000  |
| 6 | -4.274296000 | 0.525088000  | 3.569468000  |
| 6 | -4.666235000 | -0.820483000 | 3.677075000  |
| 6 | -6.524057000 | 1.202960000  | 2.937440000  |
| 6 | -6.541794000 | 2.719223000  | 1.021103000  |
| 6 | -5.216910000 | 3.174454000  | 1.306560000  |
| 6 | -4.496978000 | 2.733908000  | 2.584417000  |
| 6 | -7.248407000 | 1.828284000  | 1.835733000  |
| 7 | -4.123777000 | 4.906425000  | 4.037634000  |
| 6 | -4.305692000 | 3.903309000  | 3.461091000  |
| 6 | -4.644864000 | 6.076335000  | 1.076717000  |
| 7 | -5.439426000 | 6.243544000  | 0.010932000  |
| 7 | -3.372860000 | 6.171271000  | 0.673096000  |
| 6 | -3.356761000 | 6.361474000  | -0.694113000 |
| 1 | -2.434010000 | 6.444598000  | -1.243897000 |
| 6 | -4.650148000 | 6.408169000  | -1.107593000 |
| 1 | -5.077465000 | 6.521365000  | -2.089837000 |
| 1 | -4.956851000 | 5.908340000  | 2.097588000  |

|   |               |              |              |  |
|---|---------------|--------------|--------------|--|
| 6 | -2.211528000  | 5.931097000  | 1.519330000  |  |
| 1 | -1.416784000  | 6.625969000  | 1.244479000  |  |
| 1 | -2.497965000  | 6.077333000  | 2.561023000  |  |
| 1 | -1.878204000  | 4.896119000  | 1.382186000  |  |
| 6 | -6.884717000  | 6.093307000  | 0.042676000  |  |
| 1 | -7.366379000  | 7.032912000  | 0.321339000  |  |
| 1 | -7.225719000  | 5.774115000  | -0.940976000 |  |
| 1 | -7.130038000  | 5.306805000  | 0.760875000  |  |
| 7 | -3.946002000  | -6.369445000 | -1.786033000 |  |
| 1 | -1.928468000  | -6.033863000 | -0.558378000 |  |
| 6 | -4.231739000  | -5.283551000 | -1.454828000 |  |
| 6 | -1.002739000  | -5.475818000 | -0.593674000 |  |
| 7 | -0.252262000  | -5.106450000 | 0.448295000  |  |
| 7 | -0.431939000  | -5.013014000 | -1.710076000 |  |
| 6 | 0.704904000   | -4.312177000 | -1.368313000 |  |
| 1 | 1.333022000   | -3.819181000 | -2.094490000 |  |
| 6 | 0.823120000   | -4.375611000 | -0.012741000 |  |
| 1 | 1.585883000   | -3.984057000 | 0.648857000  |  |
| 6 | -1.033344000  | -5.075048000 | -3.033779000 |  |
| 1 | -0.261957000  | -5.301591000 | -3.769911000 |  |
| 1 | -1.800948000  | -5.848901000 | -3.038600000 |  |
| 1 | -1.498189000  | -4.110152000 | -3.260732000 |  |
| 6 | -0.564360000  | -5.377310000 | 1.844284000  |  |
| 1 | 0.118337000   | -6.132738000 | 2.238597000  |  |
| 1 | -0.463365000  | -4.450215000 | 2.414572000  |  |
| 1 | -1.592064000  | -5.734149000 | 1.909533000  |  |
| 7 | -9.908878000  | -0.601047000 | -3.814841000 |  |
| 1 | -11.014340000 | -1.595997000 | -2.051612000 |  |
| 6 | -8.932065000  | -0.434106000 | -3.190878000 |  |
| 6 | -10.797001000 | -2.399224000 | -1.359624000 |  |
| 7 | -11.015190000 | -2.399416000 | -0.040730000 |  |
| 7 | -10.203694000 | -3.546547000 | -1.692355000 |  |
| 6 | -9.997666000  | -4.285636000 | -0.548308000 |  |
| 1 | -9.489782000  | -5.235002000 | -0.572157000 |  |
| 6 | -10.509836000 | -3.568934000 | 0.489562000  |  |
| 1 | -10.523739000 | -3.763475000 | 1.548829000  |  |
| 6 | -9.680020000  | -3.865707000 | -3.014642000 |  |
| 1 | -10.004012000 | -4.865762000 | -3.304309000 |  |
| 1 | -10.045013000 | -3.124724000 | -3.725077000 |  |
| 1 | -8.587572000  | -3.812429000 | -2.971173000 |  |
| 6 | -11.406201000 | -1.232687000 | 0.732460000  |  |
| 1 | -12.173270000 | -1.507285000 | 1.457336000  |  |
| 1 | -10.522633000 | -0.840643000 | 1.248054000  |  |
| 1 | -11.796843000 | -0.472234000 | 0.057881000  |  |

Cartesian coordinates of optimized geometry of  $(C_{60}(CN)_n)^{n-}$  for  $n = 1$  to  $6$  at M06L/6-31G(d,p) level. Atomic number followed by X, Y, Z coordinates in Å.

| $(C_{60}(CN))^-$ |              |              |             | $(C_{60}(CN)_2)^{2-}$ |              |             |              |
|------------------|--------------|--------------|-------------|-----------------------|--------------|-------------|--------------|
| 6                | 0.464196000  | -2.404225000 | 2.592446000 | 6                     | -1.866871000 | 1.696169000 | -2.283661000 |
| 6                | -0.950245000 | -2.115442000 | 2.586324000 | 6                     | -0.750596000 | 2.597267000 | -2.023227000 |

|   |              |              |              |   |              |              |              |
|---|--------------|--------------|--------------|---|--------------|--------------|--------------|
| 6 | 1.370791000  | -1.428497000 | 3.014835000  | 6 | -2.834342000 | 1.440249000  | -1.324349000 |
| 6 | -1.408205000 | -0.860157000 | 3.004678000  | 6 | -0.624980000 | 3.110720000  | -0.715052000 |
| 6 | -2.466459000 | -0.188677000 | 2.285376000  | 6 | 0.685277000  | 3.184680000  | -0.089126000 |
| 6 | -1.528165000 | -2.730023000 | 1.424995000  | 6 | 0.398336000  | 2.036902000  | -2.653946000 |
| 6 | -2.533620000 | -2.050212000 | 0.724221000  | 6 | 1.662205000  | 2.089265000  | -2.028256000 |
| 6 | -3.047186000 | -0.800234000 | 1.188713000  | 6 | 1.801678000  | 2.720296000  | -0.750412000 |
| 6 | 2.894313000  | -1.997108000 | 1.169225000  | 6 | -2.879549000 | -0.944882000 | -1.950561000 |
| 6 | 1.956240000  | -3.003012000 | 0.724113000  | 6 | -1.900670000 | -0.681427000 | -2.965716000 |
| 6 | 2.607869000  | -1.227115000 | 2.300866000  | 6 | -3.301433000 | 0.107281000  | -1.123133000 |
| 6 | 0.762067000  | -3.201655000 | 1.421080000  | 6 | -1.396107000 | 0.617462000  | -3.125908000 |
| 6 | -0.471667000 | -3.405453000 | 0.697222000  | 6 | 0.007001000  | 0.822808000  | -3.355523000 |
| 6 | 1.956205000  | -3.003386000 | -0.722662000 | 6 | -1.007014000 | -1.815366000 | -3.031867000 |
| 6 | 0.762001000  | -3.202388000 | -1.419480000 | 6 | 0.359097000  | -1.610086000 | -3.251262000 |
| 6 | -0.471702000 | -3.405815000 | -0.695458000 | 6 | 0.875928000  | -0.267830000 | -3.426277000 |
| 6 | 3.453791000  | 0.789468000  | 1.169382000  | 6 | -3.252184000 | -1.387520000 | 0.841255000  |
| 6 | 3.742474000  | -0.008146000 | -0.000084000 | 6 | -2.773774000 | -2.456523000 | -0.010644000 |
| 6 | 2.887535000  | 0.195354000  | 2.299077000  | 6 | -3.486145000 | -0.113839000 | 0.298017000  |
| 6 | 3.480940000  | -1.383288000 | 0.000278000  | 6 | -2.605100000 | -2.252143000 | -1.382541000 |
| 6 | 2.894251000  | -1.997705000 | -1.168331000 | 6 | -1.439624000 | -2.783490000 | -2.044486000 |
| 6 | 3.453739000  | 0.788874000  | -1.169939000 | 6 | -1.806930000 | -3.224579000 | 0.737764000  |
| 6 | 2.887435000  | 0.194178000  | -2.299305000 | 6 | -0.675372000 | -3.740610000 | 0.098066000  |
| 6 | 2.607765000  | -1.228296000 | -2.300351000 | 6 | -0.490547000 | -3.522090000 | -1.324269000 |
| 6 | 1.369420000  | 2.111955000  | 2.591829000  | 6 | -2.457378000 | 0.988606000  | 2.206313000  |
| 6 | 1.959445000  | 2.730657000  | 1.420921000  | 6 | -2.181387000 | -0.318831000 | 2.772627000  |
| 6 | 1.841958000  | 0.867891000  | 3.034120000  | 6 | -3.161651000 | 1.077440000  | 1.010546000  |
| 6 | 2.978184000  | 2.082116000  | 0.722869000  | 6 | -2.572997000 | -1.483783000 | 2.103621000  |
| 6 | 2.978146000  | 2.081743000  | -0.724061000 | 6 | -1.678969000 | -2.618877000 | 2.048437000  |
| 6 | 0.907573000  | 3.408318000  | 0.697237000  | 6 | -0.899706000 | -0.251014000 | 3.416650000  |
| 6 | 0.907540000  | 3.407954000  | -0.699006000 | 6 | -0.030561000 | -1.347214000 | 3.370889000  |
| 6 | 1.959371000  | 2.729921000  | -1.422397000 | 6 | -0.426598000 | -2.547340000 | 2.662176000  |
| 6 | -0.475333000 | 0.140598000  | 3.446743000  | 6 | -1.593009000 | 2.928480000  | 0.297427000  |
| 6 | -0.963988000 | 1.436547000  | 3.005699000  | 6 | -0.915266000 | 2.771343000  | 1.538693000  |
| 6 | 0.894550000  | -0.134136000 | 3.460595000  | 6 | -2.915897000 | 2.229345000  | 0.006930000  |
| 6 | -0.035937000 | 2.414247000  | 2.599804000  | 6 | -1.373060000 | 1.885822000  | 2.555772000  |
| 6 | -0.326001000 | 3.199309000  | 1.422463000  | 6 | -0.395568000 | 1.101470000  | 3.245106000  |
| 6 | -2.206470000 | 1.248411000  | 2.320617000  | 6 | 0.493324000  | 3.005837000  | 1.340521000  |
| 6 | -2.463772000 | 1.978530000  | 1.145144000  | 6 | 1.436464000  | 2.228587000  | 2.025993000  |
| 6 | -1.509537000 | 2.993364000  | 0.716457000  | 6 | 0.983712000  | 1.278393000  | 3.032638000  |
| 6 | -0.036060000 | 2.412922000  | -2.601027000 | 6 | 1.857186000  | -2.220840000 | 2.306508000  |
| 6 | -0.326067000 | 3.198578000  | -1.424063000 | 6 | 1.381271000  | -1.151299000 | 3.150662000  |
| 6 | -1.509571000 | 2.993002000  | -0.717897000 | 6 | 1.856547000  | 0.153825000  | 2.961611000  |
| 6 | -0.964131000 | 1.435013000  | -3.006375000 | 6 | 2.811986000  | -1.934344000 | 1.309413000  |
| 6 | 0.894389000  | -0.135903000 | -3.460549000 | 6 | 1.597962000  | -3.405539000 | -0.281159000 |
| 6 | 1.841821000  | 0.866337000  | -3.034637000 | 6 | 0.616615000  | -3.687392000 | 0.739708000  |
| 6 | 1.369297000  | 2.110631000  | -2.592963000 | 6 | 0.744168000  | -3.083944000 | 2.002398000  |
| 6 | -0.475494000 | 0.138836000  | -3.446793000 | 6 | 2.663293000  | -2.537791000 | -0.002913000 |
| 6 | -0.950362000 | -2.116771000 | -2.585198000 | 6 | 2.446396000  | -1.493424000 | -2.221817000 |
| 6 | 0.464082000  | -2.405552000 | -2.591234000 | 6 | 1.339851000  | -2.375587000 | -2.516440000 |
| 6 | 1.370653000  | -1.430037000 | -3.014166000 | 6 | 0.915416000  | -3.303077000 | -1.553258000 |
| 6 | -1.408339000 | -0.861702000 | -3.004163000 | 6 | 3.096886000  | -1.581836000 | -0.984874000 |
| 6 | -3.047200000 | -0.800803000 | -1.188083000 | 6 | 3.266989000  | 0.856374000  | -0.851872000 |
| 6 | -2.533651000 | -2.050587000 | -0.723051000 | 6 | 2.540274000  | 0.950863000  | -2.083047000 |
| 6 | -1.528239000 | -2.730764000 | -1.423526000 | 6 | 2.177237000  | -0.206053000 | -2.800674000 |
| 6 | -2.466533000 | -0.189850000 | -2.285122000 | 6 | 3.501147000  | -0.382193000 | -0.283790000 |
| 6 | -2.463831000 | 1.977955000  | -1.146014000 | 6 | 2.851737000  | 0.438443000  | 1.928369000  |



|                       |              |              |              |                       |              |              |              |
|-----------------------|--------------|--------------|--------------|-----------------------|--------------|--------------|--------------|
| 6                     | -3.090718000 | 1.426928000  | -0.000280000 | 6                     | 2.635426000  | 1.745814000  | 1.430920000  |
| 6                     | -3.630384000 | 0.002114000  | 0.000063000  | 6                     | 3.014809000  | 2.121937000  | 0.002682000  |
| 6                     | -2.206573000 | 1.247211000  | -2.321130000 | 6                     | 3.361976000  | -0.620417000 | 1.151680000  |
| 7                     | -6.272175000 | -0.062976000 | -0.000100000 | 7                     | 5.100271000  | 3.747614000  | -0.066394000 |
| 6                     | -5.105061000 | -0.038549000 | 0.000069000  | 6                     | 4.176799000  | 3.031441000  | -0.042798000 |
|                       |              |              |              | 7                     | -4.941563000 | 3.930607000  | -0.020997000 |
|                       |              |              |              | 6                     | -4.048866000 | 3.176138000  | -0.008578000 |
|                       |              |              |              | 1                     | 1.234032000  | -2.656483000 | 1.351713000  |
|                       |              |              |              | 1                     | 0.506009000  | -1.264021000 | 2.179587000  |
| $(C_{60}(CN)_3)^{3-}$ |              |              |              | $(C_{60}(CN)_4)^{4-}$ |              |              |              |
| 6                     | -0.563563000 | 2.449511000  | -2.305902000 | 6                     | -0.643312000 | 3.208617000  | 1.493745000  |
| 6                     | 0.855871000  | 2.649285000  | -2.016025000 | 6                     | -2.002817000 | 2.820282000  | 1.114040000  |
| 6                     | -1.537918000 | 2.688270000  | -1.334169000 | 6                     | 0.328731000  | 3.481052000  | 0.524779000  |
| 6                     | 1.225960000  | 3.034166000  | -0.714013000 | 6                     | -2.299243000 | 2.672355000  | -0.254079000 |
| 6                     | 2.395668000  | 2.444878000  | -0.087246000 | 6                     | -3.135793000 | 1.569287000  | -0.703245000 |
| 6                     | 1.582076000  | 1.601019000  | -2.653636000 | 6                     | -2.444505000 | 1.814554000  | 2.026274000  |
| 6                     | 2.701307000  | 1.012851000  | -2.025379000 | 6                     | -3.232596000 | 0.729496000  | 1.579413000  |
| 6                     | 3.143965000  | 1.489014000  | -0.750026000 | 6                     | -3.637406000 | 0.648866000  | 0.211832000  |
| 6                     | -2.750772000 | 0.634581000  | -1.932697000 | 6                     | 2.038508000  | 2.214340000  | 1.763964000  |
| 6                     | -1.773477000 | 0.394693000  | -2.970182000 | 6                     | 1.052215000  | 1.959674000  | 2.796860000  |
| 6                     | -2.621542000 | 1.793517000  | -1.142567000 | 6                     | 1.655972000  | 2.992836000  | 0.650917000  |
| 6                     | -0.688111000 | 1.280939000  | -3.132482000 | 6                     | -0.267801000 | 2.433843000  | 2.643875000  |
| 6                     | 0.629507000  | 0.750408000  | -3.356893000 | 6                     | -1.372310000 | 1.570585000  | 2.982514000  |
| 6                     | -1.569028000 | -1.015622000 | -3.028976000 | 6                     | 1.293613000  | 0.644029000  | 3.289877000  |
| 6                     | -0.285720000 | -1.535162000 | -3.250808000 | 6                     | 0.217799000  | -0.195516000 | 3.629616000  |
| 6                     | 0.833258000  | -0.628813000 | -3.422954000 | 6                     | -1.141834000 | 0.285797000  | 3.477409000  |
| 6                     | -3.348142000 | 0.482781000  | 0.850409000  | 6                     | 2.989558000  | 1.470566000  | -0.802334000 |
| 6                     | -3.755922000 | -0.742927000 | -0.005856000 | 6                     | 3.668987000  | 0.760187000  | 0.393458000  |
| 6                     | -2.880021000 | 1.668307000  | 0.291345000  | 6                     | 2.123028000  | 2.552558000  | -0.663859000 |
| 6                     | -3.237741000 | -0.613796000 | -1.431402000 | 6                     | 2.952745000  | 1.119191000  | 1.690932000  |
| 6                     | -2.444817000 | -1.624976000 | -2.024902000 | 6                     | 2.431775000  | 0.110045000  | 2.539506000  |
| 6                     | -3.013800000 | -1.876488000 | 0.750635000  | 6                     | 3.508722000  | -0.742608000 | 0.000434000  |
| 6                     | -2.265998000 | -2.840856000 | 0.093514000  | 6                     | 2.922504000  | -1.659528000 | 0.888335000  |
| 6                     | -2.011721000 | -2.786829000 | -1.348017000 | 6                     | 2.463317000  | -1.262194000 | 2.229255000  |
| 6                     | -1.431453000 | 2.114351000  | 2.204845000  | 6                     | 0.860250000  | 1.910816000  | -2.653438000 |
| 6                     | -1.847607000 | 0.852069000  | 2.766674000  | 6                     | 1.713015000  | 0.753670000  | -2.771866000 |
| 6                     | -1.992529000 | 2.528696000  | 1.002616000  | 6                     | 1.110744000  | 2.824185000  | -1.634014000 |
| 6                     | -2.762356000 | 0.044509000  | 2.074702000  | 6                     | 2.729537000  | 0.525904000  | -1.834766000 |
| 6                     | -2.557755000 | -1.386674000 | 2.019819000  | 6                     | 3.000763000  | -0.810608000 | -1.347960000 |
| 6                     | -0.701049000 | 0.268572000  | 3.414307000  | 6                     | 0.912127000  | -0.338033000 | -3.250094000 |
| 6                     | -0.499759000 | -1.112426000 | 3.370592000  | 6                     | 1.158683000  | -1.616155000 | -2.737981000 |
| 6                     | -1.447168000 | -1.953530000 | 2.660263000  | 6                     | 2.265828000  | -1.882309000 | -1.861486000 |
| 6                     | 0.290058000  | 3.366903000  | 0.299250000  | 6                     | -1.397617000 | 3.015037000  | -1.296514000 |
| 6                     | 0.795812000  | 2.892313000  | 1.538347000  | 6                     | -1.567179000 | 2.051724000  | -2.333348000 |
| 6                     | -1.205521000 | 3.405500000  | 0.001185000  | 6                     | -0.036274000 | 3.630112000  | -0.978452000 |
| 6                     | -0.042935000 | 2.356797000  | 2.560255000  | 6                     | -0.475148000 | 1.560540000  | -3.111351000 |
| 6                     | 0.411245000  | 1.187524000  | 3.246803000  | 6                     | -0.446790000 | 0.157912000  | -3.399634000 |
| 6                     | 2.137865000  | 2.390177000  | 1.341814000  | 6                     | -2.709794000 | 1.215612000  | -2.039511000 |
| 6                     | 2.563735000  | 1.243220000  | 2.026928000  | 6                     | -2.644448000 | -0.169445000 | -2.337207000 |
| 6                     | 1.699175000  | 0.650160000  | 3.037602000  | 6                     | -1.522173000 | -0.695001000 | -3.088200000 |
| 6                     | 0.695069000  | -2.817129000 | 2.312223000  | 6                     | 0.426972000  | -3.310449000 | -1.296315000 |
| 6                     | 0.820989000  | -1.652840000 | 3.155064000  | 6                     | 0.056792000  | -2.491634000 | -2.410786000 |
| 6                     | 1.888800000  | -0.759902000 | 2.964593000  | 6                     | -1.252552000 | -2.008302000 | -2.567640000 |

|                       |              |              |              |                       |              |              |              |
|-----------------------|--------------|--------------|--------------|-----------------------|--------------|--------------|--------------|
| 6                     | 1.659011000  | -3.044621000 | 1.308678000  | 6                     | -0.515508000 | -3.510939000 | -0.286420000 |
| 6                     | -0.130234000 | -3.687682000 | -0.286771000 | 6                     | 1.142928000  | -3.000066000 | 1.452342000  |
| 6                     | -1.114672000 | -3.431419000 | 0.733831000  | 6                     | 2.175538000  | -2.795045000 | 0.483649000  |
| 6                     | -0.704934000 | -2.995624000 | 2.003825000  | 6                     | 1.937318000  | -3.119082000 | -0.988497000 |
| 6                     | 1.228168000  | -3.487682000 | -0.004706000 | 6                     | -0.151588000 | -3.429679000 | 1.130726000  |
| 6                     | 1.565056000  | -2.475759000 | -2.218563000 | 6                     | -1.095795000 | -1.968853000 | 2.900845000  |
| 6                     | 0.172324000  | -2.696397000 | -2.536752000 | 6                     | 0.244831000  | -1.591645000 | 3.297800000  |
| 6                     | -0.681914000 | -3.268857000 | -1.561578000 | 6                     | 1.349796000  | -2.085626000 | 2.563433000  |
| 6                     | 2.093782000  | -2.884028000 | -0.986292000 | 6                     | -1.279374000 | -2.858462000 | 1.829818000  |
| 6                     | 3.481319000  | -0.861448000 | -0.851779000 | 6                     | -3.212190000 | -1.551731000 | 1.034826000  |
| 6                     | 2.888112000  | -0.414379000 | -2.078780000 | 6                     | -2.972936000 | -0.602154000 | 2.081816000  |
| 6                     | 1.993550000  | -1.229528000 | -2.799126000 | 6                     | -1.963456000 | -0.826193000 | 3.036701000  |
| 6                     | 3.040732000  | -2.047421000 | -0.284166000 | 6                     | -2.339439000 | -2.621631000 | 0.876543000  |
| 6                     | 2.890814000  | -1.013014000 | 1.928335000  | 6                     | -2.241372000 | -2.276346000 | -1.543927000 |
| 6                     | 3.372178000  | 0.226978000  | 1.437223000  | 6                     | -3.158672000 | -1.185406000 | -1.482039000 |
| 6                     | 3.891616000  | 0.362138000  | 0.006932000  | 6                     | -3.870763000 | -0.836519000 | -0.176221000 |
| 6                     | 2.799492000  | -2.186029000 | 1.151563000  | 6                     | -1.874887000 | -3.062725000 | -0.435161000 |
| 7                     | 6.515621000  | 0.730346000  | -0.041606000 | 7                     | -6.461063000 | -1.402109000 | -0.316036000 |
| 6                     | 5.355914000  | 0.570760000  | -0.027069000 | 6                     | -5.317980000 | -1.148459000 | -0.247010000 |
| 7                     | -6.377895000 | -1.137175000 | 0.043645000  | 7                     | 6.241897000  | 1.409076000  | 0.548728000  |
| 6                     | -5.220898000 | -0.958637000 | 0.030680000  | 6                     | 5.106981000  | 1.122050000  | 0.470851000  |
| 7                     | -2.105944000 | 5.895890000  | -0.009568000 | 7                     | 0.025946000  | 6.178336000  | -1.716155000 |
| 6                     | -1.717099000 | 4.791703000  | -0.006356000 | 6                     | 0.012746000  | 5.052865000  | -1.386419000 |
|                       |              |              |              | 7                     | 3.327163000  | -5.256328000 | -1.735738000 |
|                       |              |              |              | 6                     | 2.714962000  | -4.310051000 | -1.410872000 |
| $(C_{60}(CN)_5)^{5-}$ |              |              |              | $(C_{60}(CN)_6)^{6-}$ |              |              |              |
| 6                     | -2.230972000 | 1.177467000  | -2.375748000 | 6                     | -0.981197000 | -2.523231000 | -2.223544000 |
| 6                     | -2.669370000 | 2.004970000  | -1.302439000 | 6                     | -0.677108000 | -3.355207000 | -1.106764000 |
| 6                     | -2.482574000 | -0.216353000 | -2.475943000 | 6                     | 0.003301000  | -1.906969000 | -3.028129000 |
| 6                     | -3.491394000 | 1.399109000  | -0.166794000 | 6                     | 0.778820000  | -3.682286000 | -0.751494000 |
| 6                     | -2.831297000 | 1.664389000  | 1.209360000  | 6                     | 1.098037000  | -3.369102000 | 0.733494000  |
| 6                     | -1.623566000 | 2.960427000  | -1.045021000 | 6                     | -1.665420000 | -3.115568000 | -0.106676000 |
| 6                     | -1.202619000 | 3.322441000  | 0.247326000  | 6                     | -1.354166000 | -3.077337000 | 1.280088000  |
| 6                     | -1.803545000 | 2.596851000  | 1.358032000  | 6                     | 0.040256000  | -3.102313000 | 1.631541000  |
| 6                     | -0.276694000 | -0.594576000 | -3.526582000 | 6                     | -1.455165000 | 0.078472000  | -3.244483000 |
| 6                     | -0.027823000 | 0.824338000  | -3.438880000 | 6                     | -2.483995000 | -0.609697000 | -2.518598000 |
| 6                     | -1.491511000 | -1.075268000 | -3.029090000 | 6                     | -0.205502000 | -0.555771000 | -3.479636000 |
| 6                     | -0.987796000 | 1.693102000  | -2.893044000 | 6                     | -2.258049000 | -1.876151000 | -1.985239000 |
| 6                     | -0.589772000 | 2.794713000  | -2.061105000 | 6                     | -2.723313000 | -2.286074000 | -0.669379000 |
| 6                     | 1.359616000  | 1.032737000  | -3.137831000 | 6                     | -3.368464000 | 0.428434000  | -1.770259000 |
| 6                     | 1.732997000  | 2.105648000  | -2.312393000 | 6                     | -3.593081000 | 0.018274000  | -0.314058000 |
| 6                     | 0.767962000  | 3.043635000  | -1.827441000 | 6                     | -3.317582000 | -1.287050000 | 0.123684000  |
| 6                     | -0.243213000 | -3.036363000 | -1.963976000 | 6                     | 1.026364000  | 1.529805000  | -2.991294000 |
| 6                     | 0.966475000  | -2.424775000 | -2.420273000 | 6                     | -0.239215000 | 2.179359000  | -2.719927000 |
| 6                     | -1.605021000 | -2.490164000 | -2.393714000 | 6                     | 1.047736000  | 0.172009000  | -3.467968000 |
| 6                     | 0.987698000  | -1.275473000 | -3.234620000 | 6                     | -1.446665000 | 1.461785000  | -2.811136000 |
| 6                     | 1.983956000  | -0.276768000 | -3.000712000 | 6                     | -2.517256000 | 1.720001000  | -1.903834000 |
| 6                     | 1.999176000  | -2.622808000 | -1.420737000 | 6                     | -0.040227000 | 3.102330000  | -1.631593000 |
| 6                     | 3.031472000  | -1.685454000 | -1.278577000 | 6                     | -1.098084000 | 3.369271000  | -0.733576000 |
| 6                     | 2.985186000  | -0.474934000 | -2.023493000 | 6                     | -2.264928000 | 2.557430000  | -0.805250000 |
| 6                     | -2.187507000 | -2.668972000 | 0.093560000  | 6                     | 3.014974000  | -0.224360000 | -1.970007000 |
| 6                     | -0.994367000 | -3.416709000 | 0.398031000  | 6                     | 3.193545000  | 1.290002000  | -1.676162000 |
| 6                     | -2.515370000 | -2.186567000 | -1.174165000 | 6                     | 2.004404000  | -0.691010000 | -2.829070000 |

|   |              |              |              |   |              |              |              |
|---|--------------|--------------|--------------|---|--------------|--------------|--------------|
| 6 | -0.001206000 | -3.468469000 | -0.627229000 | 6 | 1.998177000  | 2.105701000  | -2.151052000 |
| 6 | 1.403454000  | -3.335129000 | -0.312329000 | 6 | 1.354104000  | 3.077051000  | -1.279971000 |
| 6 | -0.585985000 | -2.990364000 | 1.719340000  | 6 | 3.317615000  | 1.286998000  | -0.123678000 |
| 6 | 0.793534000  | -2.859477000 | 2.062169000  | 6 | 2.723522000  | 2.286131000  | 0.669401000  |
| 6 | 1.762159000  | -2.926673000 | 1.003149000  | 6 | 1.665526000  | 3.115618000  | 0.106685000  |
| 6 | -3.482026000 | -0.156491000 | -0.192942000 | 6 | 1.770309000  | -2.727672000 | -1.474140000 |
| 6 | -3.208241000 | -0.665029000 | 1.110036000  | 6 | 2.716756000  | -2.211777000 | -0.540348000 |
| 6 | -3.080968000 | -0.882197000 | -1.320644000 | 6 | 1.388929000  | -1.982928000 | -2.588930000 |
| 6 | -2.540169000 | -1.893236000 | 1.268001000  | 6 | 3.277247000  | -0.934661000 | -0.760227000 |
| 6 | -1.603729000 | -2.182863000 | 2.306178000  | 6 | 3.593262000  | -0.018294000 | 0.314064000  |
| 6 | -2.769314000 | 0.445949000  | 1.955109000  | 6 | 2.264991000  | -2.557436000 | 0.805222000  |
| 6 | -1.821973000 | 0.265685000  | 2.961984000  | 6 | 2.517270000  | -1.719996000 | 1.903769000  |
| 6 | -1.282090000 | -1.132742000 | 3.363199000  | 6 | 3.368537000  | -0.428459000 | 1.770254000  |
| 6 | 2.403781000  | -1.165641000 | 2.328685000  | 6 | 0.981220000  | 2.523193000  | 2.223502000  |
| 6 | 1.165525000  | -1.709182000 | 2.866506000  | 6 | 2.258015000  | 1.876026000  | 1.985163000  |
| 6 | 0.243923000  | -0.845507000 | 3.444090000  | 6 | 2.484070000  | 0.609709000  | 2.518638000  |
| 6 | 2.688073000  | 0.223758000  | 2.435572000  | 6 | -0.003257000 | 1.906903000  | 3.028089000  |
| 6 | 3.659243000  | 0.144398000  | 0.141244000  | 6 | -1.770184000 | 2.727588000  | 1.474074000  |
| 6 | 3.667472000  | -1.410143000 | 0.113658000  | 6 | -0.778744000 | 3.682254000  | 0.751477000  |
| 6 | 2.814355000  | -1.978194000 | 1.247672000  | 6 | 0.677163000  | 3.355212000  | 1.106772000  |
| 6 | 3.251640000  | 0.863021000  | 1.263088000  | 6 | -1.388927000 | 1.982951000  | 2.588987000  |
| 6 | 2.451540000  | 2.707426000  | -0.164028000 | 6 | -3.014963000 | 0.224382000  | 1.970024000  |
| 6 | 2.762036000  | 1.908633000  | -1.307971000 | 6 | -3.277238000 | 0.934639000  | 0.760179000  |
| 6 | 3.353192000  | 0.639381000  | -1.157277000 | 6 | -2.716629000 | 2.211745000  | 0.540292000  |
| 6 | 2.633271000  | 2.167872000  | 1.108490000  | 6 | -2.004394000 | 0.690987000  | 2.829054000  |
| 6 | 0.447333000  | 2.956818000  | 1.830948000  | 6 | -1.026326000 | -1.529834000 | 2.991213000  |
| 6 | 0.175455000  | 3.581724000  | 0.586767000  | 6 | -1.998230000 | -2.105881000 | 2.151216000  |
| 6 | 1.263331000  | 3.657143000  | -0.490899000 | 6 | -3.193548000 | -1.290079000 | 1.676148000  |
| 6 | 1.680494000  | 2.353034000  | 2.184587000  | 6 | -1.047719000 | -0.172057000 | 3.467928000  |
| 6 | 0.464735000  | 0.568765000  | 3.453710000  | 6 | 1.455169000  | -0.078501000 | 3.244464000  |
| 6 | -0.779044000 | 1.225189000  | 3.113406000  | 6 | 1.446635000  | -1.461775000 | 2.811020000  |
| 6 | -0.789862000 | 2.405970000  | 2.351898000  | 6 | 0.239278000  | -2.179416000 | 2.719963000  |
| 6 | 1.668545000  | 1.105466000  | 2.929217000  | 6 | 0.205532000  | 0.555723000  | 3.479646000  |
| 6 | -1.808141000 | -1.533007000 | 4.690975000  | 6 | 4.669038000  | -0.604405000 | 2.472919000  |
| 7 | -2.230299000 | -1.875831000 | 5.733190000  | 7 | 5.698965000  | -0.737004000 | 3.028143000  |
| 6 | 1.732204000  | 5.054286000  | -0.680954000 | 6 | 4.449852000  | 1.801523000  | -2.290968000 |
| 7 | 2.094611000  | 6.162831000  | -0.821794000 | 7 | 5.411632000  | 2.221225000  | -2.825601000 |
| 6 | 5.054419000  | -1.932725000 | 0.173001000  | 6 | -4.669019000 | 0.604380000  | -2.472908000 |
| 7 | 6.149695000  | -2.354307000 | 0.236569000  | 7 | -5.698925000 | 0.737618000  | -3.028019000 |
| 6 | -4.883983000 | 1.920191000  | -0.194890000 | 6 | -4.450014000 | -1.801267000 | 2.290829000  |
| 7 | -5.975881000 | 2.353023000  | -0.237774000 | 7 | -5.411827000 | -2.220910000 | 2.825450000  |
| 6 | -2.271963000 | -3.422495000 | -3.336070000 | 6 | -1.083849000 | 5.101851000  | 1.067095000  |
| 7 | -2.773394000 | -4.182673000 | -4.079770000 | 7 | -1.312082000 | 6.228604000  | 1.322701000  |
|   |              |              |              | 6 | 1.083799000  | -5.101935000 | -1.066999000 |
|   |              |              |              | 7 | 1.311383000  | -6.228881000 | -1.322330000 |

Cartesian coordinates of optimized geometry of CO<sub>2</sub> complexes of [(IM<sup>+</sup>)<sub>n</sub>...((C<sub>60</sub>(CN)<sub>n</sub>)<sup>n-</sup>)] for n = 1 to 6 at M06L/6-31G(d,p) level. Atomic number followed by X, Y, Z coordinates in Å.

|     |              |              |             |      |             |             |              |
|-----|--------------|--------------|-------------|------|-------------|-------------|--------------|
| 1nc |              |              |             | 1'nc |             |             |              |
| 6   | 0.755516000  | -3.716125000 | 1.508236000 | 6    | 2.049325000 | 1.480079000 | -3.165142000 |
| 6   | -0.593562000 | -3.629056000 | 1.001925000 | 6    | 0.637186000 | 1.744652000 | -3.024306000 |

|   |              |              |              |   |              |              |              |
|---|--------------|--------------|--------------|---|--------------|--------------|--------------|
| 6 | 1.148264000  | -2.910562000 | 2.579226000  | 6 | 2.496001000  | 0.167830000  | -3.334867000 |
| 6 | -1.502857000 | -2.740652000 | 1.586533000  | 6 | -0.278861000 | 0.687512000  | -3.060474000 |
| 6 | -2.399978000 | -1.967447000 | 0.761929000  | 6 | -1.393811000 | 0.656466000  | -2.144942000 |
| 6 | -0.544577000 | -3.757249000 | -0.427156000 | 6 | 0.472344000  | 2.794852000  | -2.059590000 |
| 6 | -1.404835000 | -2.981505000 | -1.213363000 | 6 | -0.601066000 | 2.736530000  | -1.162795000 |
| 6 | -2.378713000 | -2.123434000 | -0.613384000 | 6 | -1.573722000 | 1.691310000  | -1.243748000 |
| 6 | 3.298617000  | -2.446358000 | 1.481614000  | 6 | 4.357504000  | 0.568092000  | -1.779749000 |
| 6 | 2.893384000  | -3.274361000 | 0.368510000  | 6 | 3.895354000  | 1.925224000  | -1.597286000 |
| 6 | 2.441572000  | -2.272342000 | 2.571195000  | 6 | 3.672071000  | -0.294195000 | -2.639248000 |
| 6 | 1.644518000  | -3.898000000 | 0.380642000  | 6 | 2.761505000  | 2.373925000  | -2.276993000 |
| 6 | 0.840305000  | -3.925359000 | -0.819241000 | 6 | 1.785940000  | 3.190125000  | -1.592053000 |
| 6 | 3.381775000  | -2.659262000 | -0.846195000 | 6 | 4.093678000  | 2.281471000  | -0.209179000 |
| 6 | 2.603488000  | -2.689872000 | -2.004831000 | 6 | 3.150291000  | 3.072632000  | 0.448932000  |
| 6 | 1.309982000  | -3.332910000 | -1.987920000 | 6 | 1.976365000  | 3.532531000  | -0.256346000 |
| 6 | 3.012839000  | 0.119780000  | 2.666889000  | 6 | 3.918934000  | -2.135393000 | -1.024392000 |
| 6 | 3.894484000  | -0.062062000 | 1.536133000  | 6 | 4.623369000  | -1.239705000 | -0.135665000 |
| 6 | 2.292441000  | -0.962874000 | 3.173149000  | 6 | 3.444183000  | -1.671771000 | -2.252128000 |
| 6 | 4.043799000  | -1.324883000 | 0.956819000  | 6 | 4.848342000  | 0.088105000  | -0.508097000 |
| 6 | 4.088703000  | -1.452504000 | -0.481765000 | 6 | 4.678292000  | 1.143734000  | 0.463774000  |
| 6 | 3.803536000  | 1.114161000  | 0.702107000  | 6 | 4.239995000  | -1.559867000 | 1.220255000  |
| 6 | 3.845697000  | 0.990808000  | -0.687262000 | 6 | 4.073897000  | -0.540058000 | 2.158378000  |
| 6 | 3.995294000  | -0.317058000 | -1.291016000 | 6 | 4.301889000  | 0.837806000  | 1.774332000  |
| 6 | 0.287956000  | 0.443588000  | 3.429218000  | 6 | 1.335112000  | -2.902574000 | -1.941635000 |
| 6 | 1.037205000  | 1.568821000  | 2.906438000  | 6 | 1.829781000  | -3.387151000 | -0.668370000 |
| 6 | 0.913554000  | -0.799966000 | 3.570768000  | 6 | 2.138485000  | -2.066881000 | -2.725353000 |
| 6 | 2.370177000  | 1.408237000  | 2.529857000  | 6 | 3.093461000  | -3.007046000 | -0.217908000 |
| 6 | 2.859430000  | 2.023237000  | 1.314234000  | 6 | 3.292004000  | -2.651065000 | 1.170999000  |
| 6 | 0.146291000  | 2.352895000  | 2.081572000  | 6 | 0.719251000  | -3.425694000 | 0.255857000  |
| 6 | 0.617626000  | 2.946657000  | 0.908712000  | 6 | 0.910486000  | -3.081452000 | 1.595780000  |
| 6 | 1.998688000  | 2.778174000  | 0.518211000  | 6 | 2.220599000  | -2.687562000 | 2.062507000  |
| 6 | -1.100258000 | -1.916325000 | 2.696131000  | 6 | 0.181405000  | -0.664536000 | -3.243430000 |
| 6 | -1.756039000 | -0.628095000 | 2.561915000  | 6 | -0.656575000 | -1.538200000 | -2.442469000 |
| 6 | 0.202937000  | -1.998401000 | 3.190414000  | 6 | 1.545888000  | -0.925112000 | -3.381990000 |
| 6 | -1.064802000 | 0.536673000  | 2.943156000  | 6 | -0.078107000 | -2.655247000 | -1.812400000 |
| 6 | -1.145830000 | 1.703034000  | 2.097593000  | 6 | -0.452701000 | -2.960097000 | -0.452834000 |
| 6 | -2.592231000 | -0.660786000 | 1.396154000  | 6 | -1.657513000 | -0.741029000 | -1.792731000 |
| 6 | -2.610839000 | 0.458279000  | 0.543986000  | 6 | -1.965733000 | -1.005656000 | -0.446371000 |
| 6 | -1.910682000 | 1.673242000  | 0.930631000  | 6 | -1.384153000 | -2.163270000 | 0.214526000  |
| 6 | 0.693335000  | 2.749848000  | -1.425994000 | 6 | 0.635204000  | -1.376203000 | 3.180417000  |
| 6 | -0.182986000 | 2.918527000  | -0.295204000 | 6 | -0.062874000 | -2.261898000 | 2.283599000  |
| 6 | -1.428832000 | 2.286868000  | -0.274502000 | 6 | -1.191271000 | -1.812823000 | 1.593172000  |
| 6 | 0.277344000  | 1.930904000  | -2.491599000 | 6 | 0.168335000  | -0.057805000 | 3.332951000  |
| 6 | 2.538910000  | 0.941923000  | -2.619725000 | 6 | 2.492737000  | 0.777748000  | 3.255693000  |
| 6 | 2.959839000  | 1.774739000  | -1.516527000 | 6 | 2.967971000  | -0.576270000 | 3.086679000  |
| 6 | 2.040632000  | 2.647947000  | -0.925831000 | 6 | 2.046848000  | -1.627131000 | 3.034584000  |
| 6 | 1.228790000  | 1.015336000  | -3.094668000 | 6 | 1.125938000  | 1.032407000  | 3.373485000  |
| 6 | 1.151354000  | -1.431885000 | -3.337438000 | 6 | 1.344611000  | 3.016282000  | 1.933548000  |
| 6 | 2.505107000  | -1.513697000 | -2.842506000 | 6 | 2.758522000  | 2.754983000  | 1.805697000  |
| 6 | 3.184653000  | -0.347796000 | -2.483887000 | 6 | 3.321322000  | 1.651561000  | 2.450260000  |
| 6 | 0.524335000  | -0.186911000 | -3.457407000 | 6 | 0.543201000  | 2.165217000  | 2.702474000  |
| 6 | -1.577979000 | -1.111264000 | -2.616524000 | 6 | -1.248834000 | 2.278762000  | 1.043289000  |
| 6 | -0.918018000 | -2.367048000 | -2.429287000 | 6 | -0.403858000 | 3.093384000  | 0.225271000  |
| 6 | 0.415307000  | -2.548163000 | -2.815319000 | 6 | 0.861530000  | 3.494433000  | 0.669157000  |
| 6 | -0.857852000 | -0.023928000 | -3.076881000 | 6 | -0.768240000 | 1.781151000  | 2.240698000  |
| 6 | -1.848327000 | 1.442938000  | -1.383416000 | 6 | -1.664180000 | -0.446826000 | 1.759227000  |

|     |              |              |              |     |              |              |              |
|-----|--------------|--------------|--------------|-----|--------------|--------------|--------------|
| 6   | -2.653937000 | 0.381389000  | -0.874229000 | 6   | -2.226744000 | -0.001376000 | 0.525716000  |
| 6   | -2.719111000 | -0.968178000 | -1.584885000 | 6   | -2.218355000 | 1.477204000  | 0.146500000  |
| 6   | -1.016458000 | 1.314829000  | -2.504783000 | 6   | -1.014667000 | 0.402032000  | 2.666914000  |
| 7   | -5.180115000 | -1.144215000 | -2.520391000 | 7   | -4.737963000 | 2.258548000  | 0.214313000  |
| 6   | -4.065877000 | -1.123953000 | -2.163337000 | 6   | -3.601490000 | 1.983333000  | 0.188297000  |
| 6   | -5.505519000 | 1.226531000  | -0.393299000 | 6   | -5.017357000 | -1.015135000 | 0.206117000  |
| 7   | -5.163407000 | 2.457758000  | 0.000973000  | 7   | -4.762849000 | -2.168297000 | 0.833979000  |
| 7   | -5.805458000 | 0.503629000  | 0.689292000  | 7   | -5.080492000 | -1.252572000 | -1.106204000 |
| 6   | -5.610853000 | 1.284207000  | 1.809765000  | 6   | -4.823500000 | -2.590249000 | -1.326560000 |
| 1   | -5.754045000 | 0.893904000  | 2.803522000  | 1   | -4.778508000 | -3.002003000 | -2.320900000 |
| 6   | -5.210766000 | 2.509562000  | 1.378585000  | 6   | -4.629043000 | -3.164969000 | -0.110627000 |
| 1   | -4.937630000 | 3.398699000  | 1.922018000  | 1   | -4.385731000 | -4.177434000 | 0.165294000  |
| 1   | -5.542462000 | 0.858077000  | -1.409765000 | 1   | -5.169896000 | -0.048683000 | 0.664375000  |
| 6   | -6.126576000 | -0.918160000 | 0.683234000  | 6   | -5.222980000 | -0.229362000 | -2.133036000 |
| 1   | -6.986520000 | -1.097988000 | 1.328934000  | 1   | -6.023687000 | -0.508303000 | -2.819034000 |
| 1   | -6.350945000 | -1.223940000 | -0.338301000 | 1   | -5.462966000 | 0.716353000  | -1.649226000 |
| 1   | -5.259811000 | -1.478575000 | 1.044222000  | 1   | -4.275871000 | -0.134724000 | -2.670274000 |
| 6   | -4.676659000 | 3.510129000  | -0.878010000 | 6   | -4.559185000 | -2.307472000 | 2.267450000  |
| 1   | -5.318696000 | 4.388999000  | -0.802162000 | 1   | -5.446417000 | -2.730850000 | 2.742237000  |
| 1   | -3.650305000 | 3.760921000  | -0.601481000 | 1   | -3.693322000 | -2.947159000 | 2.440646000  |
| 1   | -4.677835000 | 3.140694000  | -1.902206000 | 1   | -4.340693000 | -1.325073000 | 2.685587000  |
| 6   | 4.109144000  | 5.098642000  | -0.303926000 | 6   | -7.631525000 | 2.079603000  | 0.278722000  |
| 8   | 4.991933000  | 4.337657000  | -0.218074000 | 8   | -7.482110000 | 0.948227000  | 0.007988000  |
| 8   | 3.234298000  | 5.869612000  | -0.389286000 | 8   | -7.824219000 | 3.196117000  | 0.548437000  |
| 2nc |              |              |              | 3nc |              |              |              |
| 6   | 2.648713000  | -0.967615000 | -1.329667000 | 6   | -0.160717000 | -3.797638000 | -0.100326000 |
| 6   | 1.512134000  | -1.315223000 | -2.171494000 | 6   | 1.238494000  | -3.734081000 | 0.259449000  |
| 6   | 2.745808000  | -1.389425000 | -0.011882000 | 6   | -0.581345000 | -3.305261000 | -1.340950000 |
| 6   | 0.436829000  | -1.982513000 | -1.541156000 | 6   | 2.155009000  | -3.178408000 | -0.642000000 |
| 6   | -0.929814000 | -1.592220000 | -1.843642000 | 6   | 3.212622000  | -2.317809000 | -0.159404000 |
| 6   | 1.232729000  | -0.168816000 | -2.979429000 | 6   | 1.327887000  | -3.424046000 | 1.656902000  |
| 6   | -0.095198000 | 0.219054000  | -3.245144000 | 6   | 2.345421000  | -2.562384000 | 2.107123000  |
| 6   | -1.179193000 | -0.540267000 | -2.700208000 | 6   | 3.320845000  | -2.051262000 | 1.199245000  |
| 6   | 3.686535000  | 0.789015000  | 0.657035000  | 6   | -2.577382000 | -2.319120000 | -0.309463000 |
| 6   | 3.619151000  | 1.220304000  | -0.711369000 | 6   | -2.100217000 | -2.750392000 | 0.960735000  |
| 6   | 3.216160000  | -0.491766000 | 0.992849000  | 6   | -1.810209000 | -2.546544000 | -1.450880000 |
| 6   | 3.107048000  | 0.357756000  | -1.691829000 | 6   | -0.940684000 | -3.540739000 | 1.081805000  |
| 6   | 2.226536000  | 0.857156000  | -2.711259000 | 6   | -0.016605000 | -3.292007000 | 2.173007000  |
| 6   | 3.259983000  | 2.618913000  | -0.724574000 | 6   | -2.416241000 | -1.749954000 | 1.957208000  |
| 6   | 2.396046000  | 3.100967000  | -1.712193000 | 6   | -1.537003000 | -1.555311000 | 3.043162000  |
| 6   | 1.874830000  | 2.207562000  | -2.726931000 | 6   | -0.308530000 | -2.319256000 | 3.122377000  |
| 6   | 2.158384000  | 0.400935000  | 3.029099000  | 6   | -2.156676000 | -0.267534000 | -2.202411000 |
| 6   | 2.611193000  | 1.726931000  | 2.658381000  | 6   | -2.974318000 | 0.036827000  | -1.101260000 |
| 6   | 2.439193000  | -0.695040000 | 2.201189000  | 6   | -1.638567000 | -1.548410000 | -2.489848000 |
| 6   | 3.372574000  | 1.922146000  | 1.505579000  | 6   | -3.429378000 | -1.037386000 | -0.129923000 |
| 6   | 3.100153000  | 3.049927000  | 0.647901000  | 6   | -3.090791000 | -0.665824000 | 1.329462000  |
| 6   | 1.574499000  | 2.664829000  | 3.014658000  | 6   | -2.612603000 | 1.348387000  | -0.660082000 |
| 6   | 1.306548000  | 3.756116000  | 2.184591000  | 6   | -2.624199000 | 1.714244000  | 0.713217000  |
| 6   | 2.086616000  | 3.955281000  | 0.979537000  | 6   | -2.763424000 | 0.644690000  | 1.679395000  |
| 6   | 0.198229000  | -1.594649000 | 2.485947000  | 6   | 0.473564000  | -0.503554000 | -3.258821000 |
| 6   | -0.115750000 | -0.459812000 | 3.329997000  | 6   | -0.098563000 | 0.802178000  | -3.094441000 |
| 6   | 1.484957000  | -1.736124000 | 1.984572000  | 6   | -0.282551000 | -1.661605000 | -2.963181000 |
| 6   | 0.847125000  | 0.518397000  | 3.599639000  | 6   | -1.370362000 | 0.931337000  | -2.522199000 |

|   |              |              |              |   |              |              |              |
|---|--------------|--------------|--------------|---|--------------|--------------|--------------|
| 6 | 0.479348000  | 1.916151000  | 3.595550000  | 6 | -1.738048000 | 1.952597000  | -1.615282000 |
| 6 | -1.473894000 | -0.076850000 | 3.061107000  | 6 | 0.949064000  | 1.675362000  | -2.573878000 |
| 6 | -1.836377000 | 1.273602000  | 3.057498000  | 6 | 0.691156000  | 2.673099000  | -1.647249000 |
| 6 | -0.837067000 | 2.287183000  | 3.321513000  | 6 | -0.745566000 | 3.036297000  | -1.215546000 |
| 6 | 0.477299000  | -2.478467000 | -0.220301000 | 6 | 1.727428000  | -2.697160000 | -1.928936000 |
| 6 | -0.810074000 | -2.302063000 | 0.362561000  | 6 | 2.501883000  | -1.523873000 | -2.242953000 |
| 6 | 1.747291000  | -2.398710000 | 0.612337000  | 6 | 0.362667000  | -2.748626000 | -2.273694000 |
| 6 | -0.990805000 | -1.958222000 | 1.731232000  | 6 | 1.871495000  | -0.447116000 | -2.895911000 |
| 6 | -1.988728000 | -0.981988000 | 2.048294000  | 6 | 2.159478000  | 0.894147000  | -2.468148000 |
| 6 | -1.724040000 | -1.835523000 | -0.648585000 | 6 | 3.449997000  | -1.296812000 | -1.174959000 |
| 6 | -2.680501000 | -0.864668000 | -0.312788000 | 6 | 3.667242000  | 0.011666000  | -0.721822000 |
| 6 | -2.861507000 | -0.468550000 | 1.071522000  | 6 | 3.049859000  | 1.124921000  | -1.411923000 |
| 6 | -2.286041000 | 3.109765000  | 1.683580000  | 6 | 0.802049000  | 3.136668000  | 0.655650000  |
| 6 | -2.732695000 | 1.790636000  | 2.050649000  | 6 | 1.571634000  | 2.854006000  | -0.535782000 |
| 6 | -3.209783000 | 0.917423000  | 1.064783000  | 6 | 2.759238000  | 2.122078000  | -0.432397000 |
| 6 | -2.350443000 | 3.508179000  | 0.335531000  | 6 | 1.265229000  | 2.670013000  | 1.905936000  |
| 6 | -0.122423000 | 4.569768000  | 0.533295000  | 6 | -1.058514000 | 2.036382000  | 2.459453000  |
| 6 | -0.054986000 | 4.148778000  | 1.912891000  | 6 | -1.507445000 | 2.520493000  | 1.174241000  |
| 6 | -1.115095000 | 3.420348000  | 2.466680000  | 6 | -0.578351000 | 3.107403000  | 0.319972000  |
| 6 | -1.241150000 | 4.243253000  | -0.239518000 | 6 | 0.305102000  | 2.103060000  | 2.812441000  |
| 6 | 0.195420000  | 3.717841000  | -2.167496000 | 6 | 0.171387000  | -0.146593000 | 3.792354000  |
| 6 | 1.357735000  | 4.044194000  | -1.373470000 | 6 | -1.232280000 | -0.211930000 | 3.436147000  |
| 6 | 1.198879000  | 4.449566000  | -0.042578000 | 6 | -1.827089000 | 0.866412000  | 2.766876000  |
| 6 | -1.080515000 | 3.818270000  | -1.605347000 | 6 | 0.923485000  | 0.993981000  | 3.483434000  |
| 6 | -1.785280000 | 1.758364000  | -2.723694000 | 6 | 2.839001000  | -0.394914000 | 2.840816000  |
| 6 | -0.455355000 | 1.613119000  | -3.239915000 | 6 | 2.044344000  | -1.554362000 | 3.093335000  |
| 6 | 0.516873000  | 2.602940000  | -3.014987000 | 6 | 0.740485000  | -1.447352000 | 3.612982000  |
| 6 | -2.079837000 | 2.811661000  | -1.878617000 | 6 | 2.275730000  | 0.866018000  | 2.983393000  |
| 6 | -3.276747000 | 1.343445000  | -0.328945000 | 6 | 3.214052000  | 1.615534000  | 0.858251000  |
| 6 | -3.050304000 | 0.211094000  | -1.165112000 | 6 | 3.869067000  | 0.367053000  | 0.648220000  |
| 6 | -2.425186000 | 0.363951000  | -2.549560000 | 6 | 3.874170000  | -0.708891000 | 1.737646000  |
| 6 | -2.895709000 | 2.646687000  | -0.673491000 | 6 | 2.502739000  | 1.936926000  | 2.022392000  |
| 7 | -4.324677000 | -0.302635000 | -4.256068000 | 7 | 6.393361000  | -0.951991000 | 2.487983000  |
| 6 | -3.447292000 | 0.039244000  | -3.560594000 | 6 | 5.253827000  | -0.865791000 | 2.232505000  |
| 7 | 3.019311000  | -4.709412000 | 0.767271000  | 6 | 6.659997000  | 0.299836000  | -0.471864000 |
| 6 | 2.419796000  | -3.704832000 | 0.734239000  | 7 | 6.428733000  | 1.314706000  | -1.315256000 |
| 6 | 5.181104000  | -3.315821000 | -0.884972000 | 7 | 6.723631000  | -0.831047000 | -1.181697000 |
| 7 | 5.260716000  | -2.593780000 | -2.006656000 | 6 | 6.485644000  | -0.535967000 | -2.508117000 |
| 7 | 5.689699000  | -2.595103000 | 0.117849000  | 1 | 6.435662000  | -1.306113000 | -3.259216000 |
| 6 | 6.082965000  | -1.369157000 | -0.371223000 | 6 | 6.303193000  | 0.807740000  | -2.591907000 |
| 1 | 6.483056000  | -0.602411000 | 0.271048000  | 1 | 6.063979000  | 1.440467000  | -3.430174000 |
| 6 | 5.808665000  | -1.366192000 | -1.704029000 | 1 | 6.775680000  | 0.361809000  | 0.601359000  |
| 1 | 5.921112000  | -0.595550000 | -2.448062000 | 6 | 6.849943000  | -2.165171000 | -0.610573000 |
| 6 | 5.683093000  | -2.978640000 | 1.522325000  | 1 | 7.553912000  | -2.748009000 | -1.205680000 |
| 1 | 5.031927000  | -2.287021000 | 2.065409000  | 1 | 7.205342000  | -2.075209000 | 0.415831000  |
| 1 | 5.278996000  | -3.985531000 | 1.612034000  | 1 | 5.865990000  | -2.643256000 | -0.606993000 |
| 1 | 6.696550000  | -2.931760000 | 1.922476000  | 6 | 6.151661000  | 2.675572000  | -0.887694000 |
| 6 | 4.637895000  | -2.943466000 | -3.274859000 | 1 | 7.079094000  | 3.216001000  | -0.686945000 |
| 1 | 3.651978000  | -2.467220000 | -3.329496000 | 1 | 5.587278000  | 3.180183000  | -1.670127000 |
| 1 | 4.721390000  | -4.287447000 | -0.774849000 | 1 | 5.529992000  | 2.630625000  | 0.011192000  |
| 1 | 5.269422000  | -2.600444000 | -4.093869000 | 7 | -5.962241000 | -1.740000000 | -0.421842000 |
| 1 | 4.526076000  | -4.025108000 | -3.333550000 | 1 | -5.683648000 | -3.970622000 | 0.003196000  |
| 6 | -5.438901000 | -1.570765000 | -1.509673000 | 6 | -4.855412000 | -1.383337000 | -0.281921000 |
| 7 | -4.862171000 | -2.774136000 | -1.574012000 | 6 | -4.824842000 | -4.566836000 | -0.270687000 |
| 7 | -5.820939000 | -1.352087000 | -0.246322000 | 7 | -4.017714000 | -5.229311000 | 0.562922000  |

|    |              |              |              |     |              |              |              |
|----|--------------|--------------|--------------|-----|--------------|--------------|--------------|
| 6  | -5.435689000 | -2.429017000 | 0.523809000  | 7   | -4.336507000 | -4.676115000 | -1.508312000 |
| 1  | -5.583440000 | -2.450066000 | 1.590169000  | 6   | -3.167730000 | -5.403977000 | -1.458856000 |
| 6  | -4.831949000 | -3.319034000 | -0.306195000 | 1   | -2.564424000 | -5.569834000 | -2.335649000 |
| 1  | -4.346661000 | -4.257521000 | -0.097781000 | 6   | -2.968416000 | -5.754422000 | -0.159632000 |
| 6  | -6.393406000 | -0.107958000 | 0.240969000  | 1   | -2.155230000 | -6.275492000 | 0.317275000  |
| 1  | -5.967276000 | 0.111353000  | 1.220147000  | 6   | -4.807800000 | -3.923901000 | -2.663298000 |
| 1  | -6.104638000 | 0.696600000  | -0.436229000 | 1   | -4.991409000 | -4.602550000 | -3.497073000 |
| 1  | -7.481085000 | -0.179794000 | 0.305647000  | 1   | -5.719418000 | -3.394279000 | -2.390601000 |
| 6  | -4.191528000 | -3.311938000 | -2.749044000 | 1   | -4.037134000 | -3.192443000 | -2.931349000 |
| 1  | -3.110101000 | -3.219431000 | -2.609466000 | 6   | -4.112308000 | -5.222560000 | 2.013486000  |
| 1  | -5.558687000 | -0.899003000 | -2.348709000 | 1   | -4.264556000 | -6.235774000 | 2.388418000  |
| 1  | -4.467553000 | -4.359156000 | -2.877297000 | 1   | -3.185432000 | -4.802866000 | 2.415009000  |
| 1  | -4.490228000 | -2.731854000 | -3.621928000 | 1   | -4.946225000 | -4.588762000 | 2.311789000  |
| 6  | -2.813251000 | -3.719945000 | 3.442702000  | 7   | -1.630155000 | 5.416151000  | -1.944109000 |
| 8  | -3.561411000 | -3.949674000 | 2.569643000  | 1   | -2.222519000 | 5.862199000  | 0.247612000  |
| 8  | -2.108005000 | -3.531752000 | 4.352886000  | 6   | -1.186835000 | 4.365758000  | -1.673763000 |
|    |              |              |              | 6   | -2.776057000 | 5.345600000  | 1.020770000  |
|    |              |              |              | 7   | -2.431187000 | 5.227504000  | 2.307196000  |
|    |              |              |              | 7   | -3.904668000 | 4.664796000  | 0.818112000  |
|    |              |              |              | 6   | -4.271172000 | 4.057012000  | 1.998447000  |
|    |              |              |              | 1   | -5.132415000 | 3.413351000  | 2.058717000  |
|    |              |              |              | 6   | -3.349321000 | 4.411237000  | 2.935651000  |
|    |              |              |              | 1   | -3.240657000 | 4.127085000  | 3.968832000  |
|    |              |              |              | 6   | -4.518565000 | 4.431689000  | -0.483671000 |
|    |              |              |              | 1   | -5.589809000 | 4.626172000  | -0.423303000 |
|    |              |              |              | 1   | -4.053740000 | 5.087803000  | -1.217941000 |
|    |              |              |              | 1   | -4.332360000 | 3.392567000  | -0.771408000 |
|    |              |              |              | 6   | -1.138787000 | 5.605843000  | 2.853742000  |
|    |              |              |              | 1   | -1.273468000 | 6.104424000  | 3.814303000  |
|    |              |              |              | 1   | -0.531544000 | 4.702450000  | 2.978838000  |
|    |              |              |              | 1   | -0.641150000 | 6.280492000  | 2.158647000  |
|    |              |              |              | 6   | -2.974241000 | 3.497985000  | -4.065101000 |
|    |              |              |              | 8   | -1.957510000 | 3.420362000  | -4.634192000 |
|    |              |              |              | 8   | -4.017018000 | 3.597778000  | -3.541108000 |
| 3c |              |              |              | 4nc |              |              |              |
| 6  | 3.343502000  | -2.487691000 | -0.134430000 | 6   | -0.411655000 | -2.382165000 | -2.976246000 |
| 6  | 2.247552000  | -3.388735000 | -0.415057000 | 6   | -1.608191000 | -1.594354000 | -3.265392000 |
| 6  | 3.458171000  | -1.916614000 | 1.136648000  | 6   | -0.299012000 | -3.125927000 | -1.803967000 |
| 6  | 1.316118000  | -3.675662000 | 0.589389000  | 6   | -2.630383000 | -1.551477000 | -2.304097000 |
| 6  | -0.084643000 | -3.751924000 | 0.273162000  | 6   | -3.315082000 | -0.302660000 | -2.032193000 |
| 6  | 1.792408000  | -3.130763000 | -1.751585000 | 6   | -1.194806000 | -0.382229000 | -3.889088000 |
| 6  | 0.417928000  | -3.194639000 | -2.044331000 | 6   | -1.846652000 | 0.834754000  | -3.599667000 |
| 6  | -0.517109000 | -3.546407000 | -1.024509000 | 6   | -2.956725000 | 0.858184000  | -2.710342000 |
| 6  | 4.094230000  | 0.238282000  | 0.152565000  | 6   | 2.016683000  | -2.378920000 | -1.473703000 |
| 6  | 3.887932000  | -0.324851000 | -1.138698000 | 6   | 1.928527000  | -1.645724000 | -2.712903000 |
| 6  | 3.830387000  | -0.527575000 | 1.287747000  | 6   | 0.907712000  | -3.130251000 | -1.050029000 |
| 6  | 3.582639000  | -1.688744000 | -1.308175000 | 6   | 0.726230000  | -1.639395000 | -3.440783000 |
| 6  | 2.608884000  | -2.079793000 | -2.310712000 | 6   | 0.254095000  | -0.401307000 | -4.006750000 |
| 6  | 3.307779000  | 0.677294000  | -2.009568000 | 6   | 2.691045000  | -0.449175000 | -2.554700000 |
| 6  | 2.399311000  | 0.278782000  | -3.010271000 | 6   | 2.237008000  | 0.754123000  | -3.119796000 |
| 6  | 2.032078000  | -1.121290000 | -3.138649000 | 6   | 0.994051000  | 0.770766000  | -3.862845000 |
| 6  | 2.626890000  | 1.311961000  | 2.316594000  | 6   | 1.387904000  | -2.402888000 | 1.289089000  |
| 6  | 2.864299000  | 2.152442000  | 1.226865000  | 6   | 2.771196000  | -1.816382000 | 0.934429000  |

|   |              |              |              |   |              |              |              |
|---|--------------|--------------|--------------|---|--------------|--------------|--------------|
| 6 | 3.164603000  | 0.008342000  | 2.457877000  | 6 | 0.578726000  | -3.072737000 | 0.373466000  |
| 6 | 3.807339000  | 1.760650000  | 0.104608000  | 6 | 2.924343000  | -1.713857000 | -0.583459000 |
| 6 | 3.127480000  | 1.882109000  | -1.273764000 | 6 | 3.235177000  | -0.468021000 | -1.201887000 |
| 6 | 1.652132000  | 2.888616000  | 0.984066000  | 6 | 2.724810000  | -0.435201000 | 1.646803000  |
| 6 | 1.241030000  | 3.224744000  | -0.324051000 | 6 | 2.989717000  | 0.740028000  | 0.929955000  |
| 6 | 1.956145000  | 2.618287000  | -1.433453000 | 6 | 3.357855000  | 0.734577000  | -0.492857000 |
| 6 | 1.029985000  | -0.743886000 | 3.469186000  | 6 | -1.453022000 | -2.294711000 | 1.480121000  |
| 6 | 0.524290000  | 0.602154000  | 3.446534000  | 6 | -0.631997000 | -1.564708000 | 2.409878000  |
| 6 | 2.319114000  | -1.031817000 | 2.971109000  | 6 | -0.840673000 | -3.089100000 | 0.516905000  |
| 6 | 1.278986000  | 1.613799000  | 2.829928000  | 6 | 0.762948000  | -1.585624000 | 2.273800000  |
| 6 | 0.731101000  | 2.644303000  | 2.044225000  | 6 | 1.537189000  | -0.382050000 | 2.466188000  |
| 6 | -0.883584000 | 0.529925000  | 3.100718000  | 6 | -1.317202000 | -0.345049000 | 2.727975000  |
| 6 | -1.500227000 | 1.483796000  | 2.294124000  | 6 | -0.554331000 | 0.819327000  | 2.863827000  |
| 6 | -0.768800000 | 2.769729000  | 1.843994000  | 6 | 0.878642000  | 0.791859000  | 2.828181000  |
| 6 | 1.457198000  | -3.110183000 | 1.914410000  | 6 | -2.621686000 | -2.335694000 | -1.116199000 |
| 6 | 0.143959000  | -2.827137000 | 2.430760000  | 6 | -3.177144000 | -1.540663000 | -0.080738000 |
| 6 | 2.512420000  | -2.226821000 | 2.177216000  | 6 | -1.505179000 | -3.339386000 | -0.858025000 |
| 6 | -0.057985000 | -1.649322000 | 3.182201000  | 6 | -2.695222000 | -1.580362000 | 1.269014000  |
| 6 | -1.237154000 | -0.864895000 | 2.958685000  | 6 | -2.557351000 | -0.339214000 | 1.973168000  |
| 6 | -0.815631000 | -3.212804000 | 1.431068000  | 6 | -3.711653000 | -0.318710000 | -0.638980000 |
| 6 | -1.948803000 | -2.445064000 | 1.206154000  | 6 | -3.532047000 | 0.886381000  | 0.080423000  |
| 6 | -2.174247000 | -1.257947000 | 1.994026000  | 6 | -3.023565000 | 0.873826000  | 1.434812000  |
| 6 | -2.159402000 | 1.860923000  | 0.067435000  | 6 | 0.090899000  | 2.841960000  | 1.885415000  |
| 6 | -2.386929000 | 1.062015000  | 1.266643000  | 6 | -1.029333000 | 2.067034000  | 2.313941000  |
| 6 | -2.753502000 | -0.280262000 | 1.124392000  | 6 | -2.231905000 | 2.067080000  | 1.591158000  |
| 6 | -2.344439000 | 1.313503000  | -1.205901000 | 6 | 0.004501000  | 3.506685000  | 0.661846000  |
| 6 | -0.313724000 | 2.496850000  | -1.940904000 | 6 | 2.213197000  | 2.683677000  | -0.017908000 |
| 6 | -0.165691000 | 3.088054000  | -0.631680000 | 6 | 2.391186000  | 1.991235000  | 1.220152000  |
| 6 | -1.119182000 | 2.783755000  | 0.339692000  | 6 | 1.400085000  | 2.166172000  | 2.365278000  |
| 6 | -1.376979000 | 1.607480000  | -2.191865000 | 6 | 1.108560000  | 3.489108000  | -0.297834000 |
| 6 | 0.122329000  | 0.151676000  | -3.490562000 | 6 | 1.147344000  | 2.754615000  | -2.657461000 |
| 6 | 1.219999000  | 1.056622000  | -3.213702000 | 6 | 2.340058000  | 1.981564000  | -2.386075000 |
| 6 | 0.995197000  | 2.200255000  | -2.433165000 | 6 | 2.862487000  | 1.939932000  | -1.076418000 |
| 6 | -1.153266000 | 0.418717000  | -2.984349000 | 6 | 0.543713000  | 3.488490000  | -1.623469000 |
| 6 | -1.506831000 | -1.916351000 | -2.455288000 | 6 | -1.686551000 | 2.852447000  | -2.423889000 |
| 6 | -0.177123000 | -2.200881000 | -2.902851000 | 6 | -1.071463000 | 2.043780000  | -3.431054000 |
| 6 | 0.625438000  | -1.189129000 | -3.454152000 | 6 | 0.324433000  | 2.024426000  | -3.580468000 |
| 6 | -1.991153000 | -0.628830000 | -2.480042000 | 6 | -0.893816000 | 3.517399000  | -1.501735000 |
| 6 | -2.849799000 | -0.870299000 | -0.199385000 | 6 | -2.331467000 | 2.815815000  | 0.358204000  |
| 6 | -2.415826000 | -2.172636000 | -0.144902000 | 6 | -3.224437000 | 2.134382000  | -0.530021000 |
| 6 | -1.893538000 | -2.922337000 | -1.354365000 | 6 | -3.059762000 | 2.253131000  | -2.046897000 |
| 6 | -2.954887000 | -0.055428000 | -1.447253000 | 6 | -1.226213000 | 3.559744000  | -0.078272000 |
| 7 | -3.675597000 | -4.700426000 | -2.136413000 | 7 | -5.164693000 | 3.594676000  | -2.912438000 |
| 6 | -2.868769000 | -3.916520000 | -1.822141000 | 6 | -4.192875000 | 3.025602000  | -2.588588000 |
| 6 | -5.410333000 | -2.753476000 | 0.369048000  | 6 | -6.201407000 | 2.378809000  | -0.169431000 |
| 7 | -5.973411000 | -1.752510000 | 1.058006000  | 7 | -6.118496000 | 2.351355000  | 1.166242000  |
| 7 | -5.150395000 | -3.745974000 | 1.232334000  | 7 | -6.616724000 | 1.181778000  | -0.592947000 |
| 6 | -5.532251000 | -3.354891000 | 2.497427000  | 6 | -6.740011000 | 0.346534000  | 0.497905000  |
| 1 | -5.398910000 | -3.997935000 | 3.351295000  | 1 | -7.011029000 | -0.689392000 | 0.384630000  |
| 6 | -6.049646000 | -2.103568000 | 2.387448000  | 6 | -6.424838000 | 1.076915000  | 1.599622000  |
| 1 | -6.460185000 | -1.436328000 | 3.126640000  | 1 | -6.364068000 | 0.806135000  | 2.640026000  |
| 1 | -5.180811000 | -2.697861000 | -0.695499000 | 1 | -5.987459000 | 3.219617000  | -0.815575000 |
| 6 | -4.466583000 | -4.993321000 | 0.922189000  | 6 | -6.736327000 | 0.784810000  | -1.989303000 |
| 1 | -4.836565000 | -5.769124000 | 1.592444000  | 1 | -7.658770000 | 0.218659000  | -2.125204000 |
| 1 | -4.653293000 | -5.266658000 | -0.114927000 | 1 | -6.747200000 | 1.681208000  | -2.608691000 |



|   |              |              |              |   |              |              |              |
|---|--------------|--------------|--------------|---|--------------|--------------|--------------|
| 1 | -3.389924000 | -4.859972000 | 1.065836000  | 1 | -5.867726000 | 0.173271000  | -2.255249000 |
| 6 | -6.345236000 | -0.455980000 | 0.506462000  | 6 | -5.501219000 | 3.393712000  | 1.967534000  |
| 1 | -7.226406000 | -0.090894000 | 1.036050000  | 1 | -6.046714000 | 3.503666000  | 2.905702000  |
| 1 | -5.507401000 | 0.234202000  | 0.641596000  | 1 | -4.457314000 | 3.125297000  | 2.159195000  |
| 1 | -6.531985000 | -0.555169000 | -0.563422000 | 1 | -5.538201000 | 4.332632000  | 1.416723000  |
| 7 | 6.146860000  | 2.985179000  | 0.208258000  | 7 | 4.767610000  | -3.364746000 | 1.721773000  |
| 1 | 7.438080000  | 1.220892000  | -0.389753000 | 6 | 3.869570000  | -2.665784000 | 1.439643000  |
| 6 | 5.087087000  | 2.491314000  | 0.151087000  | 6 | 4.863669000  | -3.489502000 | -1.543015000 |
| 6 | 7.261054000  | 0.184056000  | -0.140942000 | 7 | 5.031985000  | -2.946239000 | -2.759853000 |
| 7 | 7.061571000  | -0.817895000 | -1.001825000 | 7 | 4.185432000  | -4.639251000 | -1.690966000 |
| 7 | 7.108201000  | -0.286716000 | 1.099001000  | 6 | 3.850869000  | -4.787911000 | -3.024053000 |
| 6 | 6.777363000  | -1.621819000 | 1.026112000  | 1 | 3.239838000  | -5.606412000 | -3.365570000 |
| 1 | 6.553083000  | -2.200068000 | 1.906916000  | 6 | 4.390549000  | -3.737984000 | -3.692306000 |
| 6 | 6.750606000  | -1.957250000 | -0.292075000 | 1 | 4.349218000  | -3.462268000 | -4.732654000 |
| 1 | 6.491520000  | -2.879909000 | -0.784158000 | 1 | 5.277818000  | -3.137756000 | -0.609648000 |
| 6 | 7.040513000  | 0.533618000  | 2.301904000  | 6 | 3.667986000  | -5.431887000 | -0.588891000 |
| 1 | 7.728963000  | 0.145775000  | 3.053464000  | 1 | 3.634238000  | -6.479971000 | -0.888730000 |
| 1 | 7.294860000  | 1.560173000  | 2.042058000  | 1 | 4.318066000  | -5.303699000 | 0.277031000  |
| 1 | 6.012261000  | 0.505781000  | 2.678901000  | 1 | 2.662420000  | -5.081552000 | -0.333777000 |
| 6 | 7.002568000  | -0.687908000 | -2.448825000 | 6 | 5.736632000  | -1.703787000 | -3.017478000 |
| 1 | 7.786606000  | -1.286008000 | -2.915440000 | 1 | 6.789911000  | -1.895217000 | -3.241096000 |
| 1 | 6.017846000  | -1.024160000 | -2.784260000 | 1 | 5.259050000  | -1.192983000 | -3.852929000 |
| 1 | 7.129423000  | 0.360158000  | -2.716258000 | 1 | 5.642466000  | -1.063712000 | -2.138691000 |
| 7 | -1.867003000 | 4.958026000  | 2.839381000  | 7 | -2.408967000 | -5.820091000 | -0.743062000 |
| 1 | -3.649594000 | 5.239650000  | 1.301866000  | 6 | -2.213553000 | -5.152949000 | 2.365524000  |
| 6 | -1.357556000 | 3.979450000  | 2.449466000  | 7 | -3.393259000 | -4.543910000 | 2.503652000  |
| 6 | -3.596300000 | 4.965032000  | 0.258633000  | 7 | -1.428667000 | -4.795856000 | 3.388243000  |
| 7 | -4.351396000 | 4.058998000  | -0.370042000 | 6 | -2.115566000 | -3.895677000 | 4.177589000  |
| 7 | -2.680167000 | 5.415109000  | -0.601874000 | 1 | -1.656298000 | -3.425184000 | 5.030576000  |
| 6 | -2.848454000 | 4.765545000  | -1.807703000 | 6 | -3.346363000 | -3.738862000 | 3.620610000  |
| 1 | -2.176444000 | 4.927612000  | -2.633986000 | 1 | -4.173849000 | -3.108292000 | 3.897671000  |
| 6 | -3.897639000 | 3.908139000  | -1.662171000 | 1 | -1.947880000 | -5.793233000 | 1.534522000  |
| 1 | -4.311178000 | 3.128303000  | -2.291085000 | 6 | 0.000775000  | -5.050075000 | 3.460845000  |
| 6 | -1.569282000 | 6.288491000  | -0.257635000 | 1 | 0.279487000  | -5.291661000 | 4.486927000  |
| 1 | -1.567730000 | 7.164105000  | -0.908299000 | 1 | 0.246384000  | -5.889360000 | 2.811471000  |
| 1 | -1.666523000 | 6.588112000  | 0.785095000  | 1 | 0.540239000  | -4.159119000 | 3.121388000  |
| 1 | -0.637108000 | 5.726794000  | -0.377838000 | 6 | -4.462705000 | -4.561677000 | 1.514659000  |
| 6 | -5.390222000 | 3.242143000  | 0.241270000  | 1 | -5.420098000 | -4.687595000 | 2.022017000  |
| 1 | -6.319498000 | 3.809246000  | 0.327083000  | 1 | -4.436295000 | -3.613946000 | 0.964224000  |
| 1 | -5.527981000 | 2.367842000  | -0.403763000 | 1 | -4.287421000 | -5.382586000 | 0.820171000  |
| 1 | -5.053927000 | 2.926769000  | 1.231486000  | 6 | -1.996236000 | -4.730103000 | -0.866571000 |
| 8 | -4.976345000 | -1.196359000 | -2.058755000 | 7 | 2.665675000  | 3.630134000  | 4.168471000  |
| 6 | -4.490538000 | -0.055445000 | -1.900795000 | 6 | 2.061231000  | 2.950693000  | 3.428324000  |
| 8 | -5.058217000 | 1.060157000  | -1.962344000 | 6 | 3.127111000  | 5.322207000  | 1.436496000  |
|   |              |              |              | 7 | 2.534501000  | 6.000298000  | 0.448561000  |
|   |              |              |              | 7 | 4.269662000  | 4.809768000  | 0.972144000  |
|   |              |              |              | 6 | 4.393561000  | 5.143495000  | -0.356909000 |
|   |              |              |              | 1 | 5.218237000  | 4.791582000  | -0.953736000 |
|   |              |              |              | 6 | 3.308535000  | 5.895277000  | -0.685426000 |
|   |              |              |              | 1 | 2.996884000  | 6.320700000  | -1.624823000 |
|   |              |              |              | 1 | 2.745189000  | 5.166299000  | 2.437888000  |
|   |              |              |              | 6 | 5.101157000  | 3.858631000  | 1.696975000  |
|   |              |              |              | 1 | 6.152346000  | 4.090918000  | 1.523957000  |
|   |              |              |              | 1 | 4.868035000  | 3.922900000  | 2.759424000  |
|   |              |              |              | 1 | 4.853117000  | 2.848112000  | 1.358166000  |

|    |              |              |              |              |     |              |              |              |
|----|--------------|--------------|--------------|--------------|-----|--------------|--------------|--------------|
|    | 6            | 1.215431000  | 6.609366000  | 0.516363000  |     |              |              |              |
|    | 1            | 1.299118000  | 7.697747000  | 0.483957000  |     |              |              |              |
|    | 1            | 0.729077000  | 6.293363000  | 1.438259000  |     |              |              |              |
|    | 1            | 0.618848000  | 6.242253000  | -0.321215000 |     |              |              |              |
|    | 6            | 4.512296000  | 0.713679000  | 4.155513000  |     |              |              |              |
|    | 8            | 3.806053000  | 0.139767000  | 4.886529000  |     |              |              |              |
|    | 8            | 5.250385000  | 1.297187000  | 3.458954000  |     |              |              |              |
| 4c |              |              |              |              | 5nc |              |              |              |
| 6  | 1.161199000  | -2.158409000 | 3.027010000  |              | 6   | 0.966082000  | 2.906563000  | -2.133951000 |
| 6  | 2.423866000  | -1.423706000 | 3.126311000  |              | 6   | 2.008420000  | 2.999821000  | -1.174387000 |
| 6  | 0.879506000  | -2.956640000 | 1.925863000  |              | 6   | -0.388690000 | 3.202519000  | -1.840956000 |
| 6  | 3.329381000  | -1.495246000 | 2.055909000  |              | 6   | 1.741093000  | 3.510990000  | 0.241330000  |
| 6  | 4.042266000  | -0.306480000 | 1.630362000  |              | 6   | 2.231179000  | 2.518923000  | 1.315969000  |
| 6  | 2.146309000  | -0.159659000 | 3.713178000  |              | 6   | 2.922193000  | 1.932846000  | -1.414802000 |
| 6  | 2.821484000  | 1.000738000  | 3.274617000  |              | 6   | 3.493199000  | 1.184500000  | -0.371277000 |
| 6  | 3.819597000  | 0.909505000  | 2.262962000  |              | 6   | 3.097119000  | 1.481171000  | 0.989016000  |
| 6  | -1.433901000 | -2.113198000 | 1.812590000  |              | 6   | -1.135857000 | 1.340483000  | -3.310734000 |
| 6  | -1.161869000 | -1.312134000 | 2.987009000  |              | 6   | 0.248496000  | 1.064029000  | -3.613499000 |
| 6  | -0.408474000 | -2.940107000 | 1.315517000  |              | 6   | -1.437472000 | 2.368599000  | -2.385142000 |
| 6  | 0.120490000  | -1.327386000 | 3.566124000  |              | 6   | 1.282466000  | 1.837719000  | -3.059581000 |
| 6  | 0.720243000  | -0.089912000 | 3.992976000  |              | 6   | 2.492568000  | 1.220016000  | -2.612990000 |
| 6  | -1.860441000 | -0.078876000 | 2.828614000  |              | 6   | 0.422739000  | -0.356207000 | -3.721857000 |
| 6  | -1.281505000 | 1.126641000  | 3.255934000  |              | 6   | 1.617174000  | -0.943039000 | -3.271076000 |
| 6  | 0.033938000  | 1.114577000  | 3.858470000  |              | 6   | 2.688058000  | -0.156906000 | -2.774159000 |
| 6  | -1.086317000 | -2.267894000 | -0.985908000 |              | 6   | -3.080347000 | 0.922983000  | -1.257414000 |
| 6  | -2.417716000 | -1.656169000 | -0.536232000 |              | 6   | -2.767098000 | -0.139033000 | -2.172894000 |
| 6  | -0.221564000 | -2.941678000 | -0.131441000 |              | 6   | -2.478286000 | 2.206156000  | -1.404290000 |
| 6  | -2.379011000 | -1.429712000 | 0.970864000  |              | 6   | -1.793836000 | 0.067026000  | -3.169773000 |
| 6  | -2.538308000 | -0.143349000 | 1.538982000  |              | 6   | -0.859177000 | -0.982400000 | -3.461324000 |
| 6  | -2.543679000 | -0.330310000 | -1.452751000 |              | 6   | -2.826504000 | -1.379736000 | -1.445308000 |
| 6  | -2.457948000 | 0.934400000  | -0.651586000 |              | 6   | -1.976241000 | -2.449165000 | -1.794661000 |
| 6  | -2.671537000 | 1.026405000  | 0.771963000  |              | 6   | -0.924214000 | -2.172730000 | -2.714029000 |
| 6  | 1.701410000  | -2.403959000 | -1.533512000 |              | 6   | -2.292976000 | 2.333144000  | 1.085599000  |
| 6  | 0.814120000  | -1.670405000 | -2.401722000 |              | 6   | -3.181847000 | 1.085907000  | 1.293851000  |
| 6  | 1.159860000  | -3.065708000 | -0.436470000 |              | 6   | -2.012766000 | 2.832511000  | -0.191107000 |
| 6  | -0.556813000 | -1.578954000 | -2.100571000 |              | 6   | -3.428952000 | 0.342113000  | -0.010114000 |
| 6  | -1.296209000 | -0.377178000 | -2.328153000 |              | 6   | -3.246846000 | -1.088228000 | -0.099135000 |
| 6  | 1.512800000  | -0.514617000 | -2.854685000 |              | 6   | -2.322883000 | 0.259693000  | 2.276921000  |
| 6  | 0.804526000  | 0.683179000  | -2.995699000 |              | 6   | -2.243531000 | -1.147788000 | 2.194475000  |
| 6  | -0.610424000 | 0.730276000  | -2.773507000 |              | 6   | -2.611511000 | -1.801240000 | 0.953936000  |
| 6  | 3.142983000  | -2.339614000 | 0.929234000  |              | 6   | 0.222063000  | 3.529834000  | 0.555295000  |
| 6  | 3.621704000  | -1.650347000 | -0.214029000 |              | 6   | -0.024182000 | 2.935926000  | 1.824726000  |
| 6  | 1.959899000  | -3.291364000 | 0.863967000  |              | 6   | -0.730903000 | 3.441761000  | -0.459428000 |
| 6  | 2.988553000  | -1.737969000 | -1.493487000 |              | 6   | -1.252475000 | 2.293145000  | 2.058079000  |
| 6  | 2.837916000  | -0.541361000 | -2.257408000 |              | 6   | -1.348503000 | 1.076110000  | 2.827251000  |
| 6  | 4.266848000  | -0.425823000 | 0.204362000  |              | 6   | 1.203024000  | 2.285409000  | 2.273553000  |
| 6  | 4.080664000  | 0.744055000  | -0.561995000 |              | 6   | 1.179083000  | 1.108868000  | 3.021817000  |
| 6  | 3.405273000  | 0.679625000  | -1.842083000 |              | 6   | -0.137626000 | 0.499066000  | 3.540064000  |
| 6  | 0.389989000  | 2.783664000  | -2.067040000 |              | 6   | -0.658117000 | -2.780944000 | 1.654195000  |
| 6  | 1.401609000  | 1.931343000  | -2.577319000 |              | 6   | -0.981105000 | -1.725805000 | 2.586606000  |
| 6  | 2.682637000  | 1.904993000  | -1.995479000 |              | 6   | 0.049628000  | -0.996114000 | 3.175874000  |
| 6  | 0.650151000  | 3.535077000  | -0.921117000 |              | 6   | 0.694993000  | -3.099379000 | 1.373383000  |

|   |              |              |              |   |              |              |              |
|---|--------------|--------------|--------------|---|--------------|--------------|--------------|
| 6 | -1.531164000 | 2.907968000  | 0.067260000  | 6 | 0.071330000  | -3.421445000 | -1.002569000 |
| 6 | -1.815810000 | 2.077251000  | -1.081099000 | 6 | -1.451137000 | -3.412491000 | -0.695539000 |
| 6 | -0.994385000 | 2.156310000  | -2.349779000 | 6 | -1.707074000 | -2.867754000 | 0.703371000  |
| 6 | -0.331459000 | 3.613324000  | 0.161068000  | 6 | 1.039542000  | -3.355720000 | -0.004794000 |
| 6 | -0.152518000 | 3.024710000  | 2.545177000  | 6 | 2.584300000  | -2.204811000 | -1.546019000 |
| 6 | -1.405618000 | 2.322194000  | 2.467845000  | 6 | 1.551347000  | -2.183601000 | -2.518184000 |
| 6 | -2.080824000 | 2.250083000  | 1.227279000  | 6 | 0.305743000  | -2.777193000 | -2.244064000 |
| 6 | 0.369638000  | 3.671639000  | 1.411101000  | 6 | 2.321308000  | -2.727718000 | -0.277991000 |
| 6 | 2.638840000  | 2.953447000  | 1.993125000  | 6 | 3.397317000  | -0.816956000 | 0.793366000  |
| 6 | 2.094326000  | 2.234239000  | 3.113743000  | 6 | 3.723803000  | -0.227467000 | -0.456870000 |
| 6 | 0.731770000  | 2.308937000  | 3.427855000  | 6 | 3.515045000  | -0.989515000 | -1.763822000 |
| 6 | 1.784757000  | 3.606848000  | 1.127672000  | 6 | 2.783879000  | -2.089983000 | 0.929181000  |
| 6 | 2.962659000  | 2.721257000  | -0.831383000 | 6 | 1.406260000  | -1.225617000 | 2.819977000  |
| 6 | 3.910986000  | 2.041063000  | -0.004874000 | 6 | 2.070025000  | 0.056613000  | 2.691528000  |
| 6 | 3.928487000  | 2.256301000  | 1.509124000  | 6 | 3.058250000  | 0.243144000  | 1.711242000  |
| 6 | 1.955036000  | 3.551891000  | -0.326994000 | 6 | 1.736233000  | -2.259943000 | 1.906764000  |
| 7 | 6.205979000  | 3.480662000  | 2.047075000  | 6 | -0.295913000 | 0.600394000  | 5.001652000  |
| 6 | 5.163408000  | 2.976227000  | 1.872287000  | 7 | -0.494689000 | 0.571543000  | 6.156175000  |
| 6 | 6.863588000  | 2.057080000  | -0.723480000 | 6 | -4.478422000 | 1.398996000  | 1.920412000  |
| 7 | 6.605567000  | 1.970179000  | -2.033137000 | 7 | -5.561981000 | 1.598360000  | 2.322207000  |
| 7 | 7.245264000  | 0.854402000  | -0.286233000 | 6 | 4.843056000  | -1.352518000 | -2.293344000 |
| 6 | 7.178004000  | -0.038720000 | -1.334865000 | 7 | 5.947786000  | -1.548339000 | -2.632598000 |
| 1 | 7.390834000  | -1.085629000 | -1.199252000 | 6 | -1.999459000 | -4.764824000 | -0.898886000 |
| 6 | 6.775160000  | 0.658926000  | -2.429306000 | 7 | -2.385456000 | -5.846267000 | -1.135160000 |
| 1 | 6.565952000  | 0.340999000  | -3.436814000 | 6 | 2.305614000  | 4.860046000  | 0.426508000  |
| 1 | 6.782877000  | 2.940242000  | -0.103676000 | 7 | 2.675646000  | 5.967921000  | 0.524679000  |
| 6 | 7.518321000  | 0.520888000  | 1.105559000  | 1 | -6.144431000 | 0.431011000  | 0.261352000  |
| 1 | 8.426443000  | -0.080431000 | 1.162251000  | 6 | -6.018845000 | 0.635431000  | -0.790996000 |
| 1 | 7.640053000  | 1.445323000  | 1.669613000  | 7 | -6.052674000 | -0.264337000 | -1.793978000 |
| 1 | 6.664761000  | -0.035000000 | 1.506030000  | 7 | -6.050064000 | 1.869719000  | -1.338325000 |
| 6 | 5.975166000  | 3.019870000  | -2.815695000 | 6 | -5.971066000 | 1.740318000  | -2.711921000 |
| 1 | 6.432949000  | 3.064769000  | -3.804522000 | 1 | -5.882239000 | 2.599586000  | -3.355156000 |
| 1 | 4.904508000  | 2.808921000  | -2.898414000 | 6 | -5.989072000 | 0.414621000  | -2.996389000 |
| 1 | 6.115135000  | 3.973107000  | -2.308077000 | 1 | -5.936887000 | -0.108421000 | -3.936321000 |
| 7 | -4.136092000 | -3.588245000 | -1.063642000 | 6 | -5.810515000 | 3.083206000  | -0.582545000 |
| 6 | -3.443560000 | -2.661602000 | -0.871517000 | 1 | -6.149992000 | 3.935396000  | -1.173736000 |
| 6 | -5.427343000 | -1.230512000 | 1.259568000  | 1 | -6.359461000 | 3.037597000  | 0.359249000  |
| 7 | -5.694206000 | -0.038407000 | 1.805941000  | 1 | -4.738154000 | 3.177745000  | -0.366117000 |
| 7 | -5.300804000 | -2.117458000 | 2.256608000  | 6 | -6.108853000 | -1.703235000 | -1.624249000 |
| 6 | -5.437342000 | -1.461122000 | 3.460995000  | 1 | -7.136651000 | -2.067107000 | -1.734366000 |
| 1 | -5.328820000 | -1.976126000 | 4.401033000  | 1 | -5.459378000 | -2.175590000 | -2.362242000 |
| 6 | -5.692212000 | -0.156491000 | 3.178606000  | 1 | -5.709808000 | -1.951407000 | -0.640331000 |
| 1 | -5.859270000 | 0.689602000  | 3.823835000  | 1 | 6.553453000  | -0.293320000 | -0.663592000 |
| 1 | -5.307135000 | -1.374685000 | 0.181879000  | 6 | 6.452811000  | 0.716202000  | -0.291255000 |
| 6 | -4.841693000 | -3.486764000 | 2.100792000  | 7 | 6.380499000  | 1.096267000  | 0.991813000  |
| 1 | -5.257837000 | -4.093424000 | 2.905433000  | 7 | 6.410703000  | 1.812477000  | -1.059279000 |
| 1 | -5.162482000 | -3.866738000 | 1.131394000  | 6 | 6.240188000  | 2.914684000  | -0.245482000 |
| 1 | -3.746013000 | -3.490952000 | 2.136977000  | 1 | 6.103864000  | 3.903528000  | -0.650762000 |
| 6 | -5.891476000 | 1.185676000  | 1.046598000  | 6 | 6.230570000  | 2.467510000  | 1.036807000  |
| 1 | -6.927868000 | 1.519396000  | 1.152993000  | 1 | 6.094592000  | 2.990723000  | 1.968468000  |
| 1 | -5.203417000 | 1.948263000  | 1.420462000  | 6 | 6.283483000  | 1.793722000  | -2.508577000 |
| 1 | -5.647790000 | 0.965483000  | 0.000843000  | 1 | 6.831182000  | 2.638599000  | -2.927950000 |
| 7 | 2.604879000  | -5.854558000 | 0.888675000  | 1 | 6.688590000  | 0.855043000  | -2.886754000 |
| 6 | 0.173605000  | -6.115878000 | -1.040319000 | 1 | 5.223009000  | 1.859452000  | -2.773811000 |
| 7 | 0.771283000  | -5.686290000 | -2.153694000 | 6 | 6.344052000  | 0.180752000  | 2.120031000  |

|   |              |              |              |   |              |              |              |
|---|--------------|--------------|--------------|---|--------------|--------------|--------------|
| 7 | -1.120179000 | -5.781788000 | -1.101107000 | 1 | 5.657669000  | 0.571239000  | 2.870710000  |
| 6 | -1.347735000 | -5.093741000 | -2.272043000 | 1 | 5.935938000  | -0.771817000 | 1.779967000  |
| 1 | -2.321744000 | -4.684391000 | -2.496229000 | 1 | 7.343158000  | 0.047302000  | 2.543182000  |
| 6 | -0.159205000 | -5.036652000 | -2.935155000 | 1 | 0.371288000  | 6.580280000  | 0.611190000  |
| 1 | 0.111328000  | -4.562316000 | -3.863842000 | 6 | -0.477371000 | 6.459553000  | -0.048022000 |
| 1 | 0.681896000  | -6.586977000 | -0.210640000 | 7 | -1.749763000 | 6.253037000  | 0.314776000  |
| 6 | -2.063702000 | -5.903204000 | 0.002054000  | 7 | -0.409187000 | 6.457577000  | -1.382648000 |
| 1 | -3.068636000 | -5.727184000 | -0.380536000 | 6 | -1.662505000 | 6.189331000  | -1.887296000 |
| 1 | -1.987688000 | -6.897439000 | 0.442873000  | 1 | -1.832327000 | 6.080846000  | -2.945168000 |
| 1 | -1.827867000 | -5.137665000 | 0.750427000  | 6 | -2.503347000 | 6.061788000  | -0.825991000 |
| 6 | 2.201538000  | -5.748004000 | -2.413827000 | 1 | -3.552613000 | 5.824607000  | -0.775120000 |
| 1 | 2.383818000  | -6.261334000 | -3.359019000 | 6 | 0.823250000  | 6.494351000  | -2.157530000 |
| 1 | 2.587381000  | -4.724271000 | -2.454218000 | 1 | 0.661935000  | 7.090188000  | -3.056440000 |
| 1 | 2.684970000  | -6.273256000 | -1.590922000 | 1 | 1.612477000  | 6.930937000  | -1.546795000 |
| 6 | 2.344960000  | -4.713438000 | 0.926763000  | 1 | 1.099599000  | 5.466393000  | -2.423561000 |
| 7 | -2.439517000 | 3.552305000  | -4.055333000 | 6 | -2.184834000 | 5.921848000  | 1.661705000  |
| 6 | -1.757672000 | 2.904143000  | -3.358783000 | 1 | -3.028562000 | 6.551815000  | 1.949227000  |
| 6 | -4.441978000 | 3.838271000  | -1.525969000 | 1 | -2.468914000 | 4.862348000  | 1.684995000  |
| 7 | -4.725868000 | 4.487518000  | -0.388454000 | 1 | -1.356688000 | 6.077930000  | 2.351249000  |
| 7 | -5.555791000 | 3.251460000  | -1.970279000 | 1 | -0.550320000 | -6.164773000 | -2.580749000 |
| 6 | -6.580040000 | 3.532332000  | -1.095171000 | 6 | -0.175284000 | -5.594353000 | -3.419174000 |
| 1 | -7.575338000 | 3.150819000  | -1.254076000 | 7 | 1.106136000  | -5.329507000 | -3.697263000 |
| 6 | -6.062916000 | 4.309257000  | -0.103292000 | 7 | -0.942291000 | -4.985420000 | -4.330515000 |
| 1 | -6.518010000 | 4.745629000  | 0.770779000  | 6 | -0.127012000 | -4.276419000 | -5.187511000 |
| 1 | -3.485679000 | 3.811414000  | -2.029057000 | 1 | -0.530618000 | -3.659522000 | -5.972769000 |
| 6 | -5.647862000 | 2.399398000  | -3.157686000 | 6 | 1.155475000  | -4.487527000 | -4.785848000 |
| 1 | -6.485639000 | 2.742159000  | -3.766511000 | 1 | 2.087373000  | -4.090139000 | -5.152330000 |
| 1 | -4.714770000 | 2.477274000  | -3.714350000 | 6 | -2.393628000 | -4.907072000 | -4.274486000 |
| 1 | -5.766879000 | 1.355677000  | -2.848339000 | 1 | -2.788463000 | -4.882400000 | -5.290274000 |
| 6 | -3.775361000 | 5.237374000  | 0.423486000  | 1 | -2.776627000 | -5.772360000 | -3.735369000 |
| 1 | -4.180860000 | 6.229299000  | 0.629467000  | 1 | -2.667679000 | -3.997269000 | -3.721307000 |
| 1 | -2.833607000 | 5.317928000  | -0.117014000 | 6 | 2.218753000  | -5.624445000 | -2.807298000 |
| 1 | -3.576643000 | 4.698311000  | 1.352723000  | 1 | 3.084785000  | -5.927623000 | -3.396258000 |
| 6 | -3.914143000 | -0.220312000 | -2.223368000 | 1 | 2.456324000  | -4.729655000 | -2.221291000 |
| 8 | -3.858958000 | 0.078743000  | -3.421626000 | 1 | 1.932121000  | -6.434427000 | -2.138066000 |
| 8 | -4.943410000 | -0.348237000 | -1.482415000 | 1 | -0.881997000 | -1.717280000 | 6.051331000  |
|   |              |              |              | 6 | -1.522572000 | -2.397728000 | 5.506042000  |
|   |              |              |              | 7 | -1.179546000 | -3.589276000 | 5.004142000  |
|   |              |              |              | 7 | -2.795442000 | -2.151306000 | 5.188084000  |
|   |              |              |              | 6 | -3.265575000 | -3.191738000 | 4.416545000  |
|   |              |              |              | 1 | -4.256845000 | -3.179715000 | 3.996285000  |
|   |              |              |              | 6 | -2.254562000 | -4.093284000 | 4.299700000  |
|   |              |              |              | 1 | -2.185632000 | -5.012800000 | 3.743101000  |
|   |              |              |              | 6 | -3.497161000 | -0.902799000 | 5.450224000  |
|   |              |              |              | 1 | -4.442829000 | -1.108947000 | 5.953860000  |
|   |              |              |              | 1 | -2.864060000 | -0.271144000 | 6.073697000  |
|   |              |              |              | 1 | -3.673186000 | -0.400595000 | 4.494072000  |
|   |              |              |              | 6 | 0.188919000  | -4.064922000 | 4.889962000  |
|   |              |              |              | 1 | 0.248009000  | -5.113883000 | 5.183962000  |
|   |              |              |              | 1 | 0.520459000  | -3.942630000 | 3.851584000  |
|   |              |              |              | 1 | 0.829529000  | -3.467845000 | 5.536388000  |
|   |              |              |              | 6 | 3.921718000  | -2.943048000 | 3.995624000  |
|   |              |              |              | 8 | 4.638909000  | -2.062469000 | 3.720422000  |
|   |              |              |              | 8 | 3.256977000  | -3.848038000 | 4.325294000  |

| 5c |              |              |              | 6nc |              |              |              |
|----|--------------|--------------|--------------|-----|--------------|--------------|--------------|
| 6  | -2.169830000 | 2.375451000  | -2.104137000 | 6   | 2.203945000  | 1.150021000  | -2.688402000 |
| 6  | -1.274967000 | 3.242947000  | -1.405888000 | 6   | 2.308425000  | 2.266621000  | -1.823014000 |
| 6  | -3.242821000 | 1.718177000  | -1.485369000 | 6   | 1.084194000  | 0.896961000  | -3.513731000 |
| 6  | -1.485022000 | 3.575713000  | 0.071188000  | 6   | 1.215853000  | 3.328991000  | -1.784020000 |
| 6  | -0.228445000 | 3.278224000  | 0.917399000  | 6   | 0.717959000  | 3.579987000  | -0.339866000 |
| 6  | 0.020474000  | 3.011912000  | -1.926922000 | 6   | 3.004539000  | 1.848022000  | -0.657078000 |
| 6  | 1.178296000  | 2.989092000  | -1.119333000 | 6   | 2.634664000  | 2.292955000  | 0.635122000  |
| 6  | 1.006478000  | 3.063951000  | 0.307747000  | 6   | 1.443419000  | 3.078653000  | 0.751990000  |
| 6  | -2.878829000 | -0.289837000 | -2.904634000 | 6   | 1.352507000  | -1.520155000 | -3.086710000 |
| 6  | -1.780908000 | 0.396213000  | -3.532628000 | 6   | 2.546565000  | -1.251577000 | -2.343884000 |
| 6  | -3.567278000 | 0.356060000  | -1.846812000 | 6   | 0.609814000  | -0.452171000 | -3.657453000 |
| 6  | -1.436024000 | 1.705066000  | -3.168423000 | 6   | 2.963082000  | 0.053986000  | -2.116122000 |
| 6  | -0.070140000 | 2.101104000  | -3.061836000 | 6   | 3.543588000  | 0.509985000  | -0.865533000 |
| 6  | -0.723695000 | -0.552197000 | -3.788696000 | 6   | 2.749555000  | -2.353205000 | -1.277050000 |
| 6  | 0.620230000  | -0.143348000 | -3.680257000 | 6   | 3.062122000  | -1.732973000 | 0.072313000  |
| 6  | 0.955170000  | 1.194309000  | -3.371276000 | 6   | 3.488052000  | -0.417607000 | 0.200525000  |
| 6  | -3.509008000 | -1.697330000 | -0.489549000 | 6   | -1.517807000 | -1.502725000 | -2.987947000 |
| 6  | -2.767550000 | -2.351961000 | -1.542316000 | 6   | -0.769416000 | -2.578955000 | -2.386911000 |
| 6  | -3.950961000 | -0.357899000 | -0.663378000 | 6   | -0.832267000 | -0.464108000 | -3.676006000 |
| 6  | -2.451073000 | -1.654968000 | -2.714156000 | 6   | 0.634292000  | -2.581306000 | -2.417584000 |
| 6  | -1.146743000 | -1.832513000 | -3.295561000 | 6   | 1.377491000  | -3.061064000 | -1.301533000 |
| 6  | -1.819284000 | -3.242945000 | -0.927778000 | 6   | -1.449554000 | -2.973917000 | -1.183085000 |
| 6  | -0.577427000 | -3.485306000 | -1.545426000 | 6   | -0.728676000 | -3.478487000 | -0.088376000 |
| 6  | -0.227152000 | -2.705321000 | -2.671978000 | 6   | 0.690650000  | -3.370690000 | -0.126136000 |
| 6  | -3.349110000 | 0.093996000  | 1.720737000  | 6   | -2.393701000 | 1.183365000  | -2.654479000 |
| 6  | -3.107844000 | -1.399562000 | 2.025317000  | 6   | -3.322798000 | 0.079598000  | -2.103706000 |
| 6  | -3.779264000 | 0.532288000  | 0.465197000  | 6   | -1.258616000 | 0.884420000  | -3.417237000 |
| 6  | -3.057323000 | -2.221878000 | 0.748314000  | 6   | -2.690060000 | -1.301673000 | -2.207128000 |
| 6  | -2.001157000 | -3.156344000 | 0.496428000  | 6   | -2.620726000 | -2.160329000 | -1.056345000 |
| 6  | -1.730132000 | -1.348999000 | 2.729338000  | 6   | -3.487065000 | 0.528093000  | -0.625860000 |
| 6  | -0.749606000 | -2.336235000 | 2.498889000  | 6   | -3.541571000 | -0.395363000 | 0.445203000  |
| 6  | -0.845609000 | -3.178477000 | 1.327596000  | 6   | -3.013090000 | -1.736768000 | 0.235021000  |
| 6  | -2.496521000 | 2.600984000  | 0.727700000  | 6   | -0.080559000 | 2.810771000  | -2.457044000 |
| 6  | -1.980220000 | 2.118926000  | 1.966259000  | 6   | -1.186614000 | 3.039358000  | -1.600656000 |
| 6  | -3.342464000 | 1.806309000  | -0.036785000 | 6   | -0.085338000 | 1.730261000  | -3.335453000 |
| 6  | -2.363504000 | 0.846965000  | 2.422427000  | 6   | -2.317749000 | 2.210702000  | -1.675901000 |
| 6  | -1.457339000 | -0.040093000 | 3.110022000  | 6   | -3.075411000 | 1.845933000  | -0.500926000 |
| 6  | -0.580841000 | 2.514406000  | 2.061722000  | 6   | -0.700839000 | 3.469526000  | -0.300620000 |
| 6  | 0.362297000  | 1.691692000  | 2.689489000  | 6   | -1.387241000 | 3.166557000  | 0.874956000  |
| 6  | -0.047650000 | 0.410105000  | 3.452047000  | 6   | -2.761036000 | 2.468262000  | 0.852038000  |
| 6  | 1.343890000  | -2.537614000 | 1.475109000  | 6   | -2.225459000 | -1.041417000 | 2.272456000  |
| 6  | 0.622070000  | -1.891751000 | 2.549993000  | 6   | -2.970932000 | 0.055082000  | 1.693030000  |
| 6  | 0.984911000  | -0.601897000 | 2.909231000  | 6   | -2.574320000 | 1.371527000  | 1.936587000  |
| 6  | 2.420545000  | -1.865232000 | 0.855243000  | 6   | -1.100121000 | -0.787686000 | 3.089314000  |
| 6  | 1.689632000  | -2.775531000 | -1.334130000 | 6   | 0.065047000  | -2.704604000 | 2.030393000  |
| 6  | 0.676183000  | -3.751079000 | -0.682263000 | 6   | -1.231152000 | -3.221844000 | 1.356220000  |
| 6  | 0.445819000  | -3.380470000 | 0.775814000  | 6   | -2.326802000 | -2.160682000 | 1.402056000  |
| 6  | 2.534265000  | -1.962857000 | -0.591404000 | 6   | 0.068335000  | -1.624444000 | 2.911788000  |
| 6  | 2.529782000  | -0.265280000 | -2.320611000 | 6   | 2.370937000  | -1.072452000 | 2.219106000  |
| 6  | 1.577485000  | -1.039295000 | -3.054633000 | 6   | 2.296987000  | -2.095227000 | 1.239130000  |
| 6  | 1.158127000  | -2.280483000 | -2.557912000 | 6   | 1.171291000  | -2.931210000 | 1.172215000  |
| 6  | 2.992777000  | -0.704166000 | -1.101476000 | 6   | 1.238436000  | -0.775742000 | 2.986499000  |
| 6  | 2.702668000  | 1.535499000  | -0.137821000 | 6   | 1.504953000  | 1.604050000  | 2.548907000  |

|   |              |              |              |   |              |              |              |
|---|--------------|--------------|--------------|---|--------------|--------------|--------------|
| 6 | 2.211657000  | 2.010435000  | -1.347416000 | 6 | 2.689909000  | 1.413644000  | 1.785531000  |
| 6 | 2.317991000  | 1.226775000  | -2.641782000 | 6 | 3.311158000  | 0.025590000  | 1.676066000  |
| 6 | 3.389992000  | 0.213361000  | 0.045595000  | 6 | 0.817022000  | 0.572142000  | 3.248430000  |
| 6 | 2.015745000  | 0.096225000  | 2.224660000  | 6 | -1.366375000 | 1.632962000  | 2.664143000  |
| 6 | 1.620200000  | 1.491017000  | 2.083890000  | 6 | -0.644762000 | 2.683804000  | 1.989226000  |
| 6 | 1.970775000  | 2.180294000  | 0.910150000  | 6 | 0.760752000  | 2.683722000  | 1.955285000  |
| 6 | 2.745473000  | -0.541970000 | 1.218336000  | 6 | -0.625594000 | 0.563808000  | 3.226712000  |
| 6 | 0.225001000  | 0.561893000  | 4.894063000  | 6 | -3.824133000 | 3.414281000  | 1.236910000  |
| 7 | 0.579447000  | 0.636461000  | 6.008006000  | 7 | -4.693808000 | 4.136280000  | 1.552668000  |
| 6 | -4.155640000 | -1.973711000 | 2.888899000  | 6 | -4.655852000 | 0.054301000  | -2.730249000 |
| 7 | -5.043070000 | -2.500565000 | 3.444306000  | 7 | -5.729717000 | -0.075278000 | -3.183224000 |
| 6 | 3.385481000  | 1.812472000  | -3.466181000 | 6 | 3.815090000  | -3.288682000 | -1.692245000 |
| 7 | 4.222236000  | 2.379872000  | -4.057359000 | 7 | 4.664557000  | -4.014403000 | -2.050836000 |
| 6 | 1.155683000  | -5.137501000 | -0.839182000 | 6 | 4.599499000  | -0.014500000 | 2.390063000  |
| 7 | 1.594192000  | -6.212635000 | -0.994394000 | 7 | 5.589744000  | 0.031265000  | 3.016593000  |
| 6 | -1.954333000 | 4.963231000  | 0.235809000  | 6 | -1.640869000 | -4.507875000 | 1.948407000  |
| 7 | -2.413375000 | 6.036241000  | 0.341787000  | 7 | -1.896934000 | -5.564750000 | 2.387729000  |
| 1 | -4.830327000 | -4.110984000 | 1.629490000  | 6 | 1.594444000  | 4.618572000  | -2.391686000 |
| 6 | -5.088225000 | -4.153800000 | 0.581715000  | 7 | 1.789690000  | 5.678344000  | -2.853804000 |
| 7 | -4.548296000 | -4.957003000 | -0.348322000 | 1 | 5.668306000  | -2.456069000 | -3.648529000 |
| 7 | -6.103244000 | -3.477646000 | 0.014904000  | 6 | 5.082941000  | -1.745917000 | -4.213674000 |
| 6 | -6.150683000 | -3.800606000 | -1.326909000 | 7 | 5.219208000  | -0.415828000 | -4.204654000 |
| 1 | -6.841460000 | -3.321023000 | -1.999752000 | 7 | 4.017281000  | -2.055554000 | -4.958295000 |
| 6 | -5.191991000 | -4.734799000 | -1.550055000 | 6 | 3.433343000  | -0.891569000 | -5.406485000 |
| 1 | -4.890576000 | -5.241440000 | -2.451432000 | 1 | 2.506967000  | -0.893956000 | -5.956107000 |
| 6 | -6.764602000 | -2.348332000 | 0.642061000  | 6 | 4.183664000  | 0.138207000  | -4.926063000 |
| 1 | -7.773110000 | -2.255689000 | 0.236498000  | 1 | 4.040266000  | 1.203979000  | -4.985750000 |
| 1 | -6.802374000 | -2.510319000 | 1.720083000  | 6 | 3.430334000  | -3.378183000 | -5.077392000 |
| 1 | -6.184840000 | -1.440061000 | 0.437834000  | 1 | 3.325593000  | -3.646540000 | -6.130005000 |
| 6 | -3.491287000 | -5.927537000 | -0.113981000 | 1 | 4.064048000  | -4.095438000 | -4.557826000 |
| 1 | -3.915050000 | -6.931936000 | -0.015231000 | 1 | 2.447594000  | -3.345877000 | -4.590599000 |
| 1 | -2.782997000 | -5.890187000 | -0.942226000 | 6 | 6.090980000  | 0.325463000  | -3.308348000 |
| 1 | -2.952580000 | -5.643308000 | 0.789222000  | 1 | 6.433858000  | 1.231573000  | -3.808312000 |
| 1 | 4.315108000  | 3.883084000  | -2.161198000 | 1 | 5.518543000  | 0.577762000  | -2.400910000 |
| 6 | 3.652736000  | 4.612822000  | -1.716138000 | 1 | 6.950511000  | -0.292833000 | -3.050675000 |
| 7 | 3.602610000  | 4.956734000  | -0.426020000 | 1 | -5.260575000 | -2.456282000 | -3.124447000 |
| 7 | 2.736675000  | 5.325667000  | -2.382530000 | 6 | -5.108413000 | -3.190128000 | -2.346746000 |
| 6 | 2.044160000  | 6.103828000  | -1.480287000 | 7 | -5.644656000 | -3.131751000 | -1.116244000 |
| 1 | 1.204908000  | 6.709846000  | -1.779199000 | 7 | -4.294270000 | -4.257124000 | -2.396195000 |
| 6 | 2.593787000  | 5.879218000  | -0.257508000 | 6 | -4.291854000 | -4.870766000 | -1.160823000 |
| 1 | 2.339780000  | 6.266253000  | 0.715128000  | 1 | -3.656648000 | -5.715026000 | -0.947601000 |
| 6 | 2.343876000  | 5.084159000  | -3.762495000 | 6 | -5.134351000 | -4.169904000 | -0.360474000 |
| 1 | 2.076130000  | 6.032218000  | -4.229802000 | 1 | -5.372190000 | -4.285084000 | 0.684029000  |
| 1 | 3.173336000  | 4.619120000  | -4.294221000 | 6 | -3.378733000 | -4.510361000 | -3.492283000 |
| 1 | 1.486206000  | 4.402272000  | -3.771679000 | 1 | -2.622386000 | -5.219678000 | -3.159869000 |
| 6 | 4.445448000  | 4.399813000  | 0.624254000  | 1 | -3.912823000 | -4.912878000 | -4.356926000 |
| 1 | 3.866846000  | 4.402060000  | 1.548520000  | 1 | -2.883764000 | -3.565348000 | -3.748628000 |
| 1 | 4.703856000  | 3.357619000  | 0.392874000  | 6 | -6.440908000 | -2.027582000 | -0.615576000 |
| 1 | 5.345602000  | 5.008988000  | 0.743817000  | 1 | -7.259149000 | -2.418404000 | -0.005098000 |
| 1 | -4.428437000 | 4.972012000  | 1.037904000  | 1 | -5.785929000 | -1.364483000 | -0.027174000 |
| 6 | -5.099251000 | 4.247733000  | 0.596561000  | 1 | -6.838028000 | -1.464492000 | -1.461058000 |
| 7 | -5.758460000 | 3.274791000  | 1.236585000  | 1 | 4.643536000  | 2.218702000  | 3.590484000  |
| 7 | -5.378366000 | 4.164546000  | -0.708538000 | 6 | 4.431428000  | 3.120789000  | 3.037611000  |
| 6 | -6.200598000 | 3.077650000  | -0.913493000 | 7 | 3.586347000  | 4.104645000  | 3.407082000  |
| 1 | -6.511808000 | 2.783917000  | -1.901844000 | 7 | 5.127260000  | 3.557078000  | 1.967890000  |

|   |              |              |              |   |              |              |              |
|---|--------------|--------------|--------------|---|--------------|--------------|--------------|
| 6 | -6.435931000 | 2.518941000  | 0.303751000  | 6 | 4.643990000  | 4.797852000  | 1.600650000  |
| 1 | -6.994174000 | 1.642250000  | 0.587030000  | 1 | 4.998044000  | 5.302184000  | 0.717264000  |
| 6 | -4.730880000 | 4.943799000  | -1.754331000 | 6 | 3.693590000  | 5.144121000  | 2.503772000  |
| 1 | -5.468245000 | 5.210914000  | -2.511858000 | 1 | 3.066707000  | 6.017083000  | 2.575168000  |
| 1 | -4.296381000 | 5.839110000  | -1.311499000 | 6 | 5.996806000  | 2.716293000  | 1.167194000  |
| 1 | -3.931302000 | 4.336810000  | -2.196339000 | 1 | 6.665794000  | 3.355498000  | 0.589479000  |
| 6 | -5.521131000 | 2.879314000  | 2.616183000  | 1 | 6.574500000  | 2.064750000  | 1.823550000  |
| 1 | -6.472619000 | 2.743270000  | 3.132311000  | 1 | 5.393590000  | 2.097599000  | 0.489280000  |
| 1 | -4.946572000 | 1.944867000  | 2.619171000  | 6 | 2.655350000  | 4.006331000  | 4.513008000  |
| 1 | -4.941359000 | 3.655132000  | 3.113612000  | 1 | 1.930359000  | 4.815247000  | 4.430879000  |
| 1 | 3.806012000  | -5.619635000 | -1.253633000 | 1 | 2.128449000  | 3.050380000  | 4.444712000  |
| 6 | 4.219810000  | -4.727623000 | -1.700970000 | 1 | 3.182199000  | 4.077742000  | 5.468889000  |
| 7 | 4.978102000  | -3.810455000 | -1.096495000 | 1 | -0.555500000 | 5.985352000  | -3.224122000 |
| 7 | 3.964278000  | -4.309146000 | -2.943395000 | 6 | -1.435428000 | 5.904306000  | -2.600484000 |
| 6 | 4.570255000  | -3.084616000 | -3.129936000 | 7 | -1.510448000 | 6.323631000  | -1.330914000 |
| 1 | 4.442446000  | -2.524534000 | -4.041607000 | 7 | -2.597900000 | 5.325636000  | -2.926904000 |
| 6 | 5.207569000  | -2.767629000 | -1.967951000 | 6 | -3.413005000 | 5.322976000  | -1.814273000 |
| 1 | 5.705281000  | -1.872103000 | -1.615580000 | 1 | -4.380585000 | 4.848198000  | -1.815072000 |
| 6 | 3.030432000  | -4.945418000 | -3.857422000 | 6 | -2.734757000 | 5.950923000  | -0.816447000 |
| 1 | 3.527778000  | -5.181195000 | -4.799545000 | 1 | -3.005884000 | 6.124122000  | 0.212611000  |
| 1 | 2.646793000  | -5.852496000 | -3.390933000 | 6 | -2.826906000 | 4.555228000  | -4.137979000 |
| 1 | 2.196377000  | -4.258377000 | -4.031494000 | 1 | -3.773822000 | 4.851261000  | -4.591933000 |
| 6 | 5.340794000  | -3.810784000 | 0.314712000  | 1 | -2.011567000 | 4.743101000  | -4.835162000 |
| 1 | 6.335239000  | -4.242392000 | 0.449850000  | 1 | -2.844157000 | 3.488471000  | -3.881674000 |
| 1 | 5.326092000  | -2.765028000 | 0.643458000  | 6 | -0.388577000 | 6.851972000  | -0.572609000 |
| 1 | 4.599628000  | -4.394971000 | 0.862727000  | 1 | -0.760312000 | 7.564446000  | 0.163922000  |
| 1 | 2.857578000  | 0.750834000  | 5.347245000  | 1 | 0.128866000  | 6.012639000  | -0.086094000 |
| 6 | 3.608558000  | 0.217691000  | 4.777690000  | 1 | 0.304687000  | 7.339475000  | -1.257384000 |
| 7 | 4.531751000  | 0.750072000  | 3.972449000  | 1 | 0.552076000  | -5.739517000 | 2.975192000  |
| 7 | 3.719730000  | -1.111874000 | 4.727217000  | 6 | 1.442890000  | -5.691385000 | 2.365370000  |
| 6 | 4.723899000  | -1.433607000 | 3.840078000  | 7 | 2.597842000  | -5.092589000 | 2.683745000  |
| 1 | 4.955898000  | -2.457667000 | 3.598431000  | 7 | 1.544071000  | -6.179847000 | 1.120980000  |
| 6 | 5.234916000  | -0.265365000 | 3.360634000  | 6 | 2.779816000  | -5.833833000 | 0.614009000  |
| 1 | 5.962826000  | -0.062183000 | 2.585608000  | 1 | 3.071307000  | -6.064073000 | -0.397966000 |
| 6 | 2.808129000  | -2.040584000 | 5.380064000  | 6 | 3.435083000  | -5.150322000 | 1.590262000  |
| 1 | 3.372157000  | -2.732271000 | 6.008248000  | 1 | 4.401014000  | -4.671915000 | 1.587145000  |
| 1 | 2.105864000  | -1.467316000 | 5.986780000  | 6 | 0.442217000  | -6.752700000 | 0.367159000  |
| 1 | 2.243070000  | -2.580242000 | 4.615983000  | 1 | 0.833975000  | -7.498767000 | -0.324575000 |
| 6 | 4.650759000  | 2.165723000  | 3.653513000  | 1 | -0.264556000 | -7.209084000 | 1.059587000  |
| 1 | 5.487624000  | 2.605841000  | 4.200691000  | 1 | -0.069833000 | -5.943734000 | -0.174325000 |
| 1 | 4.814297000  | 2.232476000  | 2.572234000  | 6 | 2.806811000  | -4.248567000 | 3.850519000  |
| 1 | 3.717982000  | 2.660919000  | 3.925765000  | 1 | 3.724992000  | -4.538834000 | 4.363438000  |
| 6 | 4.940641000  | 0.293959000  | 0.341177000  | 1 | 2.871653000  | -3.203684000 | 3.524284000  |
| 8 | 5.377910000  | 1.386153000  | 0.785532000  | 1 | 1.958481000  | -4.356523000 | 4.524927000  |
| 8 | 5.596167000  | -0.772383000 | 0.213929000  | 1 | -4.870802000 | 2.403753000  | 3.313665000  |
|   |              |              |              | 6 | -5.122815000 | 1.354857000  | 3.350972000  |
|   |              |              |              | 7 | -4.726807000 | 0.465309000  | 4.280312000  |
|   |              |              |              | 7 | -5.944386000 | 0.732826000  | 2.490726000  |
|   |              |              |              | 6 | -6.006593000 | -0.601252000 | 2.835651000  |
|   |              |              |              | 1 | -6.583141000 | -1.305588000 | 2.259857000  |
|   |              |              |              | 6 | -5.245454000 | -0.771482000 | 3.946613000  |
|   |              |              |              | 1 | -5.007892000 | -1.655191000 | 4.514546000  |
|   |              |              |              | 6 | -6.468824000 | 1.330925000  | 1.272525000  |
|   |              |              |              | 1 | -7.383974000 | 0.808028000  | 0.990048000  |
|   |              |              |              | 1 | -6.681418000 | 2.385016000  | 1.454916000  |

|    |              |              |              |             |
|----|--------------|--------------|--------------|-------------|
|    | 1            | -5.725796000 | 1.249751000  | 0.469155000 |
|    | 6            | -3.631512000 | 0.681221000  | 5.208141000 |
|    | 1            | -3.908831000 | 0.319362000  | 6.200340000 |
|    | 1            | -2.741639000 | 0.155207000  | 4.840785000 |
|    | 1            | -3.410732000 | 1.746729000  | 5.254645000 |
|    | 6            | 3.439646000  | -0.285612000 | 5.376736000 |
|    | 8            | 3.439851000  | -1.448197000 | 5.492616000 |
|    | 8            | 3.456839000  | 0.882299000  | 5.315037000 |
| 6c |              |              |              |             |
| 6  | 0.685604000  | 2.221866000  | -2.938899000 |             |
| 6  | -0.598788000 | 2.667438000  | -2.527167000 |             |
| 6  | 0.916731000  | 1.038632000  | -3.666749000 |             |
| 6  | -1.846095000 | 1.880169000  | -2.906850000 |             |
| 6  | -2.699846000 | 1.538090000  | -1.663572000 |             |
| 6  | -0.449529000 | 3.281444000  | -1.254304000 |             |
| 6  | -1.424833000 | 3.134148000  | -0.221470000 |             |
| 6  | -2.484173000 | 2.192023000  | -0.444052000 |             |
| 6  | 3.011554000  | 0.691379000  | -2.407194000 |             |
| 6  | 2.801885000  | 1.941723000  | -1.743982000 |             |
| 6  | 2.053924000  | 0.222336000  | -3.350019000 |             |
| 6  | 1.664064000  | 2.696326000  | -1.976621000 |             |
| 6  | 0.956406000  | 3.428026000  | -0.939828000 |             |
| 6  | 3.473623000  | 1.918617000  | -0.349446000 |             |
| 6  | 2.519183000  | 2.446835000  | 0.708688000  |             |
| 6  | 1.400422000  | 3.204146000  | 0.382616000  |             |
| 6  | 2.199183000  | -2.062958000 | -2.443587000 |             |
| 6  | 3.150295000  | -1.587922000 | -1.462795000 |             |
| 6  | 1.694309000  | -1.171660000 | -3.432079000 |             |
| 6  | 3.527861000  | -0.240549000 | -1.428709000 |             |
| 6  | 3.762608000  | 0.412471000  | -0.182572000 |             |
| 6  | 2.907932000  | -2.289982000 | -0.230368000 |             |
| 6  | 3.161556000  | -1.662466000 | 1.005387000  |             |
| 6  | 3.451177000  | -0.272898000 | 0.994068000  |             |
| 6  | -0.556594000 | -2.202877000 | -3.124134000 |             |
| 6  | -0.002124000 | -3.351943000 | -2.254375000 |             |
| 6  | 0.279986000  | -1.222715000 | -3.680001000 |             |
| 6  | 1.438226000  | -3.092494000 | -1.835514000 |             |
| 6  | 1.830143000  | -3.198023000 | -0.455016000 |             |
| 6  | -0.972197000 | -3.316578000 | -1.038417000 |             |
| 6  | -0.532810000 | -3.569570000 | 0.283726000  |             |
| 6  | 0.884035000  | -3.399127000 | 0.580004000  |             |
| 6  | -1.477431000 | 0.460822000  | -3.405781000 |             |
| 6  | -2.283815000 | -0.501099000 | -2.744083000 |             |
| 6  | -0.203199000 | 0.129846000  | -3.843055000 |             |
| 6  | -1.799249000 | -1.806249000 | -2.563838000 |             |
| 6  | -2.089970000 | -2.570783000 | -1.370753000 |             |
| 6  | -3.007332000 | 0.156199000  | -1.663400000 |             |
| 6  | -3.324240000 | -0.523648000 | -0.478586000 |             |
| 6  | -3.041321000 | -2.034994000 | -0.312779000 |             |
| 6  | -0.254215000 | -2.352294000 | 2.266489000  |             |
| 6  | -1.232159000 | -2.831582000 | 1.316800000  |             |
| 6  | -2.372975000 | -2.068380000 | 1.079934000  |             |
| 6  | -0.480557000 | -1.141123000 | 2.960623000  |             |



|   |              |              |              |
|---|--------------|--------------|--------------|
| 6 | 1.924375000  | -0.586882000 | 2.744957000  |
| 6 | 2.286829000  | -2.004975000 | 2.237757000  |
| 6 | 1.031993000  | -2.774547000 | 1.844173000  |
| 6 | 0.641621000  | -0.246404000 | 3.174015000  |
| 6 | 0.968212000  | 2.042605000  | 2.423766000  |
| 6 | 2.247016000  | 1.679587000  | 1.890704000  |
| 6 | 2.718528000  | 0.375293000  | 2.070920000  |
| 6 | 0.168788000  | 1.103540000  | 3.023013000  |
| 6 | -1.757568000 | 1.934425000  | 1.747889000  |
| 6 | -0.981773000 | 2.910329000  | 1.133379000  |
| 6 | 0.427129000  | 3.211553000  | 1.588989000  |
| 6 | -1.352416000 | 1.118491000  | 2.946288000  |
| 6 | -2.533370000 | -0.800911000 | 1.712801000  |
| 6 | -3.108585000 | 0.130050000  | 0.754316000  |
| 6 | -2.717354000 | 1.479453000  | 0.790053000  |
| 6 | -1.619477000 | -0.356234000 | 2.670586000  |
| 6 | -4.315009000 | -2.778991000 | -0.278074000 |
| 7 | -5.335553000 | -3.352487000 | -0.199740000 |
| 6 | -0.089919000 | -4.680249000 | -2.885182000 |
| 7 | -0.072548000 | -5.771807000 | -3.312133000 |
| 6 | 4.735766000  | 2.683875000  | -0.360042000 |
| 7 | 5.743528000  | 3.283163000  | -0.393457000 |
| 6 | 0.516193000  | 4.477499000  | 2.328970000  |
| 7 | 0.558553000  | 5.496041000  | 2.902327000  |
| 6 | 3.126063000  | -2.717914000 | 3.219033000  |
| 7 | 3.862760000  | -3.232450000 | 3.972505000  |
| 6 | -2.716797000 | 2.512530000  | -3.916752000 |
| 7 | -3.480510000 | 2.903646000  | -4.715528000 |
| 1 | 5.162160000  | 4.592278000  | -2.378667000 |
| 6 | 4.564249000  | 4.192137000  | -3.183862000 |
| 7 | 3.401592000  | 4.679361000  | -3.628615000 |
| 7 | 4.823290000  | 3.055292000  | -3.837122000 |
| 6 | 3.780134000  | 2.787695000  | -4.695838000 |
| 1 | 3.732215000  | 1.875289000  | -5.266356000 |
| 6 | 2.883659000  | 3.803633000  | -4.558121000 |
| 1 | 1.910628000  | 3.951228000  | -4.995661000 |
| 6 | 5.902627000  | 2.134416000  | -3.527837000 |
| 1 | 6.484267000  | 1.925808000  | -4.427251000 |
| 1 | 6.532458000  | 2.573047000  | -2.755235000 |
| 1 | 5.447212000  | 1.212990000  | -3.143568000 |
| 6 | 2.654132000  | 5.756394000  | -2.999242000 |
| 1 | 2.112589000  | 6.313383000  | -3.763932000 |
| 1 | 1.952655000  | 5.314005000  | -2.275728000 |
| 1 | 3.347396000  | 6.423873000  | -2.488378000 |
| 1 | 2.027208000  | -6.048306000 | -2.243963000 |
| 6 | 2.431988000  | -6.026443000 | -1.241776000 |
| 7 | 1.776462000  | -6.420326000 | -0.140993000 |
| 7 | 3.615211000  | -5.520783000 | -0.867448000 |
| 6 | 3.702992000  | -5.571124000 | 0.506937000  |
| 1 | 4.543418000  | -5.156112000 | 1.039497000  |
| 6 | 2.555032000  | -6.136097000 | 0.963056000  |
| 1 | 2.207346000  | -6.312868000 | 1.967113000  |
| 6 | 4.485981000  | -4.781634000 | -1.764007000 |
| 1 | 5.208428000  | -4.225819000 | -1.168643000 |
| 1 | 5.005714000  | -5.462268000 | -2.442457000 |

|   |              |              |              |
|---|--------------|--------------|--------------|
| 1 | 3.869678000  | -4.069095000 | -2.327490000 |
| 6 | 0.395197000  | -6.871804000 | -0.116658000 |
| 1 | 0.304302000  | -7.732927000 | 0.547612000  |
| 1 | -0.234548000 | -6.037753000 | 0.227475000  |
| 1 | 0.097055000  | -7.141564000 | -1.129912000 |
| 1 | -2.221441000 | 4.349288000  | 3.152586000  |
| 6 | -3.048452000 | 4.686093000  | 2.521887000  |
| 7 | -4.284403000 | 4.172740000  | 2.603383000  |
| 7 | -3.056440000 | 5.603843000  | 1.542860000  |
| 6 | -4.311666000 | 5.651512000  | 0.977191000  |
| 1 | -4.535328000 | 6.313867000  | 0.157658000  |
| 6 | -5.082496000 | 4.752440000  | 1.642809000  |
| 1 | -6.117134000 | 4.476701000  | 1.525589000  |
| 6 | -1.899898000 | 6.339317000  | 1.053561000  |
| 1 | -2.250420000 | 7.260200000  | 0.586475000  |
| 1 | -1.229289000 | 6.564917000  | 1.881474000  |
| 1 | -1.371434000 | 5.718009000  | 0.322830000  |
| 6 | -4.664798000 | 3.061892000  | 3.463335000  |
| 1 | -4.411777000 | 2.129015000  | 2.949835000  |
| 1 | -4.088004000 | 3.099070000  | 4.389310000  |
| 1 | -5.738379000 | 3.118722000  | 3.651472000  |
| 1 | -4.263310000 | 0.701844000  | -5.241008000 |
| 6 | -4.605965000 | -0.140875000 | -4.654796000 |
| 7 | -5.408377000 | -0.049010000 | -3.591270000 |
| 7 | -4.264418000 | -1.422780000 | -4.821230000 |
| 6 | -4.812193000 | -2.158036000 | -3.791297000 |
| 1 | -4.612144000 | -3.210321000 | -3.670122000 |
| 6 | -5.538480000 | -1.298749000 | -3.025650000 |
| 1 | -6.093325000 | -1.469488000 | -2.116701000 |
| 6 | -3.212192000 | -1.889624000 | -5.710070000 |
| 1 | -3.550408000 | -2.775141000 | -6.249338000 |
| 1 | -2.969300000 | -1.098634000 | -6.418113000 |
| 1 | -2.325983000 | -2.125083000 | -5.106954000 |
| 6 | -5.915109000 | 1.195947000  | -3.032790000 |
| 1 | -7.006012000 | 1.169769000  | -3.001057000 |
| 1 | -5.495997000 | 1.317033000  | -2.030518000 |
| 1 | -5.569114000 | 2.021883000  | -3.655313000 |
| 1 | 4.489348000  | -0.934631000 | 4.685952000  |
| 6 | 4.876755000  | -0.078982000 | 4.151279000  |
| 7 | 4.519358000  | 1.200453000  | 4.324001000  |
| 7 | 5.778243000  | -0.139643000 | 3.160898000  |
| 6 | 5.952833000  | 1.130467000  | 2.649480000  |
| 1 | 6.587522000  | 1.326483000  | 1.800422000  |
| 6 | 5.161861000  | 1.965978000  | 3.375108000  |
| 1 | 4.977872000  | 3.023479000  | 3.276453000  |
| 6 | 6.273428000  | -1.373428000 | 2.576065000  |
| 1 | 7.271351000  | -1.200719000 | 2.173168000  |
| 1 | 6.302927000  | -2.146073000 | 3.343937000  |
| 1 | 5.577530000  | -1.688304000 | 1.784084000  |
| 6 | 3.415856000  | 1.646197000  | 5.160248000  |
| 1 | 3.707599000  | 2.544508000  | 5.705091000  |
| 1 | 2.546502000  | 1.857614000  | 4.527484000  |
| 1 | 3.164243000  | 0.856469000  | 5.866548000  |
| 1 | -5.639262000 | -3.023313000 | 2.240041000  |
| 6 | -4.852046000 | -2.919115000 | 2.971733000  |

|   |              |              |             |
|---|--------------|--------------|-------------|
| 7 | -4.596121000 | -1.842995000 | 3.720759000 |
| 7 | -3.894561000 | -3.822970000 | 3.197220000 |
| 6 | -2.988250000 | -3.291327000 | 4.092319000 |
| 1 | -2.084234000 | -3.813978000 | 4.356504000 |
| 6 | -3.426513000 | -2.043327000 | 4.420225000 |
| 1 | -2.987548000 | -1.217982000 | 4.973771000 |
| 6 | -3.687659000 | -5.025331000 | 2.410947000 |
| 1 | -3.606232000 | -5.894097000 | 3.066584000 |
| 1 | -4.524023000 | -5.147662000 | 1.723098000 |
| 1 | -2.764976000 | -4.894772000 | 1.831161000 |
| 6 | -5.292210000 | -0.566658000 | 3.645081000 |
| 1 | -6.287325000 | -0.646907000 | 4.088394000 |
| 1 | -4.673880000 | 0.162172000  | 4.180417000 |
| 1 | -5.364241000 | -0.270505000 | 2.594597000 |
| 6 | -2.065443000 | 1.691703000  | 4.234788000 |
| 8 | -2.847722000 | 0.925372000  | 4.857718000 |
| 8 | -1.850048000 | 2.907161000  | 4.464883000 |

Cartesian coordinates of optimized geometry of CO<sub>2</sub> complexes of (C<sub>60</sub>(CN)<sub>n</sub>)<sup>n-</sup> for n = 1 to 6 at M06L/6-31G(d,p) level. Atomic number followed by X, Y, Z coordinates in Å.

| 1nc |              |              |              | 2nc |              |              |              |
|-----|--------------|--------------|--------------|-----|--------------|--------------|--------------|
| 7   | -1.970475000 | 0.447706000  | -0.189475000 | 6   | 1.385783000  | 2.234205000  | 2.350443000  |
| 1   | -2.689306000 | 1.094437000  | 0.100417000  | 6   | -0.060806000 | 2.211596000  | 2.528360000  |
| 6   | -0.665353000 | 0.800891000  | -0.011332000 | 6   | 1.970675000  | 2.760757000  | 1.209147000  |
| 7   | 0.118775000  | -0.251408000 | 0.112889000  | 6   | -0.852983000 | 2.638489000  | 1.441472000  |
| 7   | -0.234636000 | 2.056261000  | 0.032633000  | 6   | -2.054973000 | 1.900165000  | 1.087116000  |
| 1   | -0.835112000 | 2.807665000  | -0.260302000 | 6   | -0.386078000 | 0.983144000  | 3.173913000  |
| 1   | 0.790835000  | 2.131048000  | 0.026314000  | 6   | -1.540168000 | 0.258926000  | 2.806905000  |
| 6   | 1.678171000  | -0.242337000 | 0.016224000  | 6   | -2.405463000 | 0.762997000  | 1.782376000  |
| 8   | 2.125668000  | 0.903137000  | 0.046274000  | 6   | 3.627939000  | 0.934392000  | 1.170005000  |
| 8   | 2.110492000  | -1.368119000 | -0.068442000 | 6   | 3.046841000  | 0.401407000  | 2.368595000  |
| 6   | -2.099995000 | -0.983104000 | 0.135066000  | 6   | 3.059667000  | 2.078736000  | 0.589375000  |
| 1   | -2.418109000 | -1.111897000 | 1.173334000  | 6   | 1.938572000  | 1.037213000  | 2.946917000  |
| 6   | -0.658995000 | -1.476292000 | -0.071734000 | 6   | 0.844262000  | 0.257956000  | 3.455974000  |
| 1   | -0.493522000 | -1.862463000 | -1.080166000 | 6   | 3.087396000  | -1.040572000 | 2.284451000  |
| 1   | -2.813248000 | -1.468093000 | -0.528086000 | 6   | 2.018248000  | -1.795438000 | 2.777842000  |
| 1   | -0.349433000 | -2.233711000 | 0.644164000  | 6   | 0.879253000  | -1.135953000 | 3.384210000  |
|     |              |              |              | 6   | 3.339767000  | 1.102073000  | -1.661372000 |
|     |              |              |              | 6   | 3.883250000  | -0.094328000 | -1.051976000 |
|     |              |              |              | 6   | 2.907137000  | 2.163702000  | -0.850185000 |
|     |              |              |              | 6   | 4.042666000  | -0.176839000 | 0.333387000  |
|     |              |              |              | 6   | 3.696878000  | -1.397180000 | 1.019746000  |
|     |              |              |              | 6   | 3.406615000  | -1.232890000 | -1.801419000 |
|     |              |              |              | 6   | 3.069782000  | -2.417141000 | -1.138005000 |
|     |              |              |              | 6   | 3.224591000  | -2.504419000 | 0.301661000  |
|     |              |              |              | 6   | 0.913267000  | 2.502112000  | -2.200848000 |
|     |              |              |              | 6   | 1.327752000  | 1.389914000  | -3.036028000 |
|     |              |              |              | 6   | 1.736335000  | 2.915772000  | -1.159789000 |
|     |              |              |              | 6   | 2.519003000  | 0.704608000  | -2.771442000 |
|     |              |              |              | 6   | 2.556778000  | -0.737621000 | -2.865826000 |
|     |              |              |              | 6   | 0.145539000  | 0.666830000  | -3.413242000 |

|     |              |              |              |              |
|-----|--------------|--------------|--------------|--------------|
|     | 6            | 0.175657000  | -0.729069000 | -3.510524000 |
|     | 6            | 1.403412000  | -1.441289000 | -3.219201000 |
|     | 6            | -0.327648000 | 3.224783000  | 0.268666000  |
|     | 6            | -1.104098000 | 2.780142000  | -0.837812000 |
|     | 6            | 1.159300000  | 3.531874000  | 0.137502000  |
|     | 6            | -0.534669000 | 2.504440000  | -2.113151000 |
|     | 6            | -0.991144000 | 1.342527000  | -2.809636000 |
|     | 6            | -2.228563000 | 2.021971000  | -0.350392000 |
|     | 6            | -2.662119000 | 0.887189000  | -1.046624000 |
|     | 6            | -2.054966000 | 0.558096000  | -2.327067000 |
|     | 6            | -0.378723000 | -2.713393000 | -2.410480000 |
|     | 6            | -0.922391000 | -1.520485000 | -3.011742000 |
|     | 6            | -2.004395000 | -0.863733000 | -2.407944000 |
|     | 6            | -0.960865000 | -3.211173000 | -1.227198000 |
|     | 6            | 1.297160000  | -3.678661000 | -0.306350000 |
|     | 6            | 1.889042000  | -3.156687000 | -1.515535000 |
|     | 6            | 1.056504000  | -2.668849000 | -2.536453000 |
|     | 6            | -0.097131000 | -3.691021000 | -0.163668000 |
|     | 6            | 0.095437000  | -2.969090000 | 2.182399000  |
|     | 6            | 1.534024000  | -2.941815000 | 2.043910000  |
|     | 6            | 2.120112000  | -3.275558000 | 0.813868000  |
|     | 6            | -0.701665000 | -3.344316000 | 1.093836000  |
|     | 6            | -2.334892000 | -1.605299000 | 1.636529000  |
|     | 6            | -1.487745000 | -1.175137000 | 2.708925000  |
|     | 6            | -0.308043000 | -1.877522000 | 3.025452000  |
|     | 6            | -1.931781000 | -2.637562000 | 0.810971000  |
|     | 6            | -2.606919000 | -1.392816000 | -1.186024000 |
|     | 6            | -3.094861000 | -0.311523000 | -0.407657000 |
|     | 6            | -3.165574000 | -0.408375000 | 1.115552000  |
|     | 6            | -2.112370000 | -2.591673000 | -0.639329000 |
|     | 7            | -5.675579000 | -0.572025000 | 1.932232000  |
|     | 6            | -4.559800000 | -0.496650000 | 1.590528000  |
|     | 7            | 1.645373000  | 6.129063000  | 0.263723000  |
|     | 6            | 1.433622000  | 4.980997000  | 0.207196000  |
|     | 6            | -6.037111000 | 0.809896000  | -0.870734000 |
|     | 8            | -5.775930000 | 1.820780000  | -0.344745000 |
|     | 8            | -6.360887000 | -0.167814000 | -1.426396000 |
| 3nc |              |              |              |              |
| 6   | 1.294098000  | 2.346378000  | 2.353367000  |              |
| 6   | -0.162172000 | 2.464976000  | 2.410006000  |              |
| 6   | 2.000555000  | 2.697139000  | 1.200766000  |              |
| 6   | -0.845915000 | 2.888243000  | 1.255004000  |              |
| 6   | -2.095583000 | 2.253353000  | 0.877535000  |              |
| 6   | -0.662662000 | 1.340574000  | 3.129352000  |              |
| 6   | -1.865127000 | 0.711204000  | 2.739847000  |              |
| 6   | -2.616868000 | 1.219025000  | 1.632518000  |              |
| 6   | 3.427215000  | 0.702411000  | 1.372915000  |              |
| 6   | 2.733335000  | 0.346632000  | 2.589649000  |              |
| 6   | 3.05976000   | 1.887877000  | 0.709177000  |              |
| 6   | 1.670228000  | 1.149428000  | 3.053324000  |              |
| 6   | 0.471412000  | 0.521737000  | 3.539814000  |              |
| 6   | 2.623966000  | -1.075177000 | 2.603728000  |              |
| 6   | 1.457437000  | -1.689555000 | 3.080771000  |              |
| 3c  |              |              |              |              |
| 6   | 1.184047000  | 2.403554000  | 2.316423000  |              |
| 6   | -0.267749000 | 2.572220000  | 2.280193000  |              |
| 6   | 1.973120000  | 2.690667000  | 1.200756000  |              |
| 6   | -0.866753000 | 2.971083000  | 1.070117000  |              |
| 6   | -2.109060000 | 2.361737000  | 0.640774000  |              |
| 6   | -0.847631000 | 1.488493000  | 3.000388000  |              |
| 6   | -2.043105000 | 0.881415000  | 2.557969000  |              |
| 6   | -2.688807000 | 1.355476000  | 1.376828000  |              |
| 6   | 3.313106000  | 0.655563000  | 1.528194000  |              |
| 6   | 2.534233000  | 0.366853000  | 2.710158000  |              |
| 6   | 3.026629000  | 1.828576000  | 0.804153000  |              |
| 6   | 1.474430000  | 1.220926000  | 3.079001000  |              |
| 6   | 0.227147000  | 0.650155000  | 3.510379000  |              |
| 6   | 2.374576000  | -1.049118000 | 2.765247000  |              |
| 6   | 1.161297000  | -1.608449000 | 3.188199000  |              |

|   |              |              |              |   |              |              |              |
|---|--------------|--------------|--------------|---|--------------|--------------|--------------|
| 6 | 0.362426000  | -0.869500000 | 3.563025000  | 6 | 0.067447000  | -0.736298000 | 3.571938000  |
| 6 | 3.367914000  | 0.729519000  | -1.476682000 | 6 | 3.430523000  | 0.581345000  | -1.318654000 |
| 6 | 4.029066000  | -0.507074000 | -0.816878000 | 6 | 4.007917000  | -0.650867000 | -0.577711000 |
| 6 | 2.980616000  | 1.852437000  | -0.751024000 | 6 | 3.041403000  | 1.742700000  | -0.655784000 |
| 6 | 3.849758000  | -0.484011000 | 0.694379000  | 6 | 3.732319000  | -0.567451000 | 0.916133000  |
| 6 | 3.273361000  | -1.574379000 | 1.388598000  | 6 | 3.080208000  | -1.613035000 | 1.611111000  |
| 6 | 3.192755000  | -1.648593000 | -1.453889000 | 6 | 3.172444000  | -1.786236000 | -1.225709000 |
| 6 | 2.671223000  | -2.692187000 | -0.705308000 | 6 | 2.573749000  | -2.787563000 | -0.475138000 |
| 6 | 2.756482000  | -2.727066000 | 0.756494000  | 6 | 2.565497000  | -2.771503000 | 0.989268000  |
| 6 | 1.105139000  | 2.294501000  | -2.249137000 | 6 | 1.283848000  | 2.190903000  | -2.287561000 |
| 6 | 1.446048000  | 1.092651000  | -2.971022000 | 6 | 1.620878000  | 0.952304000  | -2.942916000 |
| 6 | 1.906808000  | 2.685213000  | -1.183154000 | 6 | 2.022837000  | 2.588664000  | -1.180716000 |
| 6 | 2.538486000  | 0.314574000  | -2.559567000 | 6 | 2.659991000  | 0.155141000  | -2.437436000 |
| 6 | 2.429142000  | -1.128261000 | -2.551138000 | 6 | 2.501308000  | -1.282657000 | -2.386764000 |
| 6 | 0.212680000  | 0.466695000  | -3.373832000 | 6 | 0.393246000  | 0.352658000  | -3.398030000 |
| 6 | 0.100998000  | -0.925007000 | -3.372685000 | 6 | 0.235991000  | -1.033630000 | -3.359332000 |
| 6 | 1.231499000  | -1.735323000 | -2.954223000 | 6 | 1.310372000  | -1.864330000 | -2.845713000 |
| 6 | -0.190305000 | 3.331766000  | 0.077255000  | 6 | -0.121817000 | 3.349253000  | -0.079744000 |
| 6 | -0.943775000 | 2.886569000  | -1.040315000 | 6 | -0.809859000 | 2.880237000  | -1.224858000 |
| 6 | 1.328861000  | 3.456405000  | 0.026206000  | 6 | 1.401204000  | 3.427360000  | -0.039075000 |
| 6 | -0.339115000 | 2.459903000  | -2.258856000 | 6 | -0.153264000 | 2.392813000  | -2.381908000 |
| 6 | -0.877560000 | 1.300162000  | -2.897151000 | 6 | -0.695125000 | 1.237306000  | -3.020829000 |
| 6 | -2.174008000 | 2.285436000  | -0.573390000 | 6 | -2.080853000 | 2.309547000  | -0.814499000 |
| 6 | -2.686884000 | 1.152206000  | -1.215348000 | 6 | -2.623247000 | 1.226481000  | -1.471276000 |
| 6 | -2.050201000 | 0.668167000  | -2.430205000 | 6 | -1.913084000 | 0.668943000  | -2.587887000 |
| 6 | -0.721473000 | -2.755213000 | -2.179209000 | 6 | -0.717083000 | -2.781063000 | -2.149075000 |
| 6 | -1.102202000 | -1.562758000 | -2.895168000 | 6 | -1.014089000 | -1.612390000 | -2.933342000 |
| 6 | -2.142125000 | -0.753645000 | -2.406043000 | 6 | -2.050514000 | -0.754124000 | -2.518118000 |
| 6 | -1.410951000 | -3.095625000 | -0.998202000 | 6 | -1.483665000 | -3.058513000 | -1.007922000 |
| 6 | 0.730899000  | -3.697192000 | 0.100223000  | 6 | 0.552131000  | -3.697188000 | 0.241808000  |
| 6 | 1.435480000  | -3.324804000 | -1.100506000 | 6 | 1.340155000  | -3.384117000 | -0.923729000 |
| 6 | 0.719474000  | -2.855747000 | -2.212671000 | 6 | 0.718905000  | -2.941141000 | -2.100163000 |
| 6 | -0.664274000 | -3.573636000 | 0.150173000  | 6 | -0.837912000 | -3.520544000 | 0.199116000  |
| 6 | -0.529926000 | -2.698442000 | 2.442653000  | 6 | -0.816712000 | -2.576718000 | 2.464667000  |
| 6 | 0.908104000  | -2.841308000 | 2.418065000  | 6 | 0.614650000  | -2.765205000 | 2.532536000  |
| 6 | 1.540932000  | -3.306447000 | 1.238460000  | 6 | 1.304269000  | -3.295083000 | 1.414174000  |
| 6 | -1.308703000 | -3.079129000 | 1.341090000  | 6 | -1.543044000 | -2.966385000 | 1.331329000  |
| 6 | -2.794580000 | -1.150006000 | 1.658303000  | 6 | -2.966389000 | -0.974073000 | 1.479507000  |
| 6 | -1.957651000 | -0.726062000 | 2.743173000  | 6 | -2.189725000 | -0.548232000 | 2.607322000  |
| 6 | -0.877463000 | -1.514264000 | 3.184676000  | 6 | -1.165800000 | -1.354014000 | 3.139523000  |
| 6 | -2.436253000 | -2.273784000 | 0.930659000  | 6 | -2.615128000 | -2.138960000 | 0.830218000  |
| 6 | -2.859764000 | -1.124543000 | -1.188620000 | 6 | -2.849893000 | -1.065124000 | -1.365766000 |
| 6 | -3.297416000 | 0.056745000  | -0.526506000 | 6 | -3.496714000 | 0.178355000  | -0.830949000 |
| 6 | -3.458701000 | 0.084118000  | 0.997674000  | 6 | -3.571153000 | 0.250200000  | 0.756559000  |
| 6 | -2.526553000 | -2.321602000 | -0.529184000 | 6 | -2.586882000 | -2.207765000 | -0.634887000 |
| 7 | -6.021137000 | 0.269518000  | 1.641718000  | 7 | -5.879993000 | 0.785914000  | 1.911273000  |
| 6 | -4.883101000 | 0.190574000  | 1.376417000  | 6 | -4.932248000 | 0.494286000  | 1.290992000  |
| 7 | 6.585080000  | -0.720697000 | -1.490144000 | 7 | 6.591190000  | -0.969418000 | -1.079332000 |
| 6 | 5.454846000  | -0.621557000 | -1.201666000 | 6 | 5.449379000  | -0.824656000 | -0.867963000 |
| 7 | 2.073714000  | 5.997426000  | -0.009057000 | 7 | 2.241671000  | 5.935997000  | -0.124168000 |
| 6 | 1.753417000  | 4.871657000  | 0.005486000  | 6 | 1.876829000  | 4.825059000  | -0.086678000 |
| 6 | -6.132575000 | 0.310202000  | -1.538405000 | 6 | -5.033730000 | 0.109104000  | -1.514960000 |
| 8 | -6.295805000 | -0.848534000 | -1.595683000 | 8 | -5.776438000 | -0.659625000 | -0.886216000 |
| 8 | -6.097206000 | 1.480635000  | -1.552117000 | 8 | -5.158609000 | 0.768985000  | -2.553000000 |

| 4c |              |              |              | 5c |              |              |              |
|----|--------------|--------------|--------------|----|--------------|--------------|--------------|
| 6  | -1.463187000 | 3.097784000  | 1.445702000  | 6  | -0.158411000 | -2.377325000 | -2.482787000 |
| 6  | -2.731799000 | 2.469518000  | 1.071480000  | 6  | -1.332059000 | -2.851284000 | -1.824990000 |
| 6  | -0.551639000 | 3.509238000  | 0.468917000  | 6  | 1.151544000  | -2.498619000 | -1.958168000 |
| 6  | -3.004486000 | 2.251975000  | -0.292248000 | 6  | -1.223154000 | -3.605054000 | -0.501265000 |
| 6  | -3.639619000 | 1.016279000  | -0.719632000 | 6  | -2.099075000 | -2.942960000 | 0.592492000  |
| 6  | -2.999764000 | 1.424400000  | 2.002899000  | 6  | -2.377787000 | -1.903467000 | -2.061350000 |
| 6  | -3.591629000 | 0.212276000  | 1.575555000  | 6  | -3.299715000 | -1.497452000 | -1.076909000 |
| 6  | -3.972800000 | 0.037555000  | 0.209748000  | 6  | -3.078798000 | -2.002122000 | 0.269056000  |
| 6  | 1.348968000  | 2.571222000  | 1.721490000  | 6  | 1.798621000  | -0.305986000 | -2.871226000 |
| 6  | 0.419587000  | 2.174015000  | 2.763974000  | 6  | 0.462294000  | -0.179930000 | -3.411498000 |
| 6  | 0.837911000  | 3.256374000  | 0.599117000  | 6  | 2.098624000  | -1.452523000 | -2.140367000 |
| 6  | -0.961603000 | 2.418363000  | 2.608555000  | 6  | -0.487786000 | -1.199504000 | -3.240121000 |
| 6  | -1.903794000 | 1.386236000  | 2.963012000  | 6  | -1.865830000 | -0.881872000 | -2.973461000 |
| 6  | 0.879062000  | 0.929379000  | 3.278637000  | 6  | 0.041442000  | 1.185078000  | -3.303085000 |
| 6  | -0.039709000 | -0.073000000 | 3.634860000  | 6  | -1.305906000 | 1.482986000  | -3.042423000 |
| 6  | -1.459834000 | 0.168698000  | 3.479361000  | 6  | -2.286079000 | 0.446296000  | -2.940324000 |
| 6  | 2.398149000  | 1.936823000  | -0.814583000 | 6  | 3.586181000  | -0.000294000 | -0.453069000 |
| 6  | 3.237080000  | 1.425736000  | 0.375613000  | 6  | 2.895218000  | 1.144677000  | -1.175977000 |
| 6  | 1.369015000  | 2.868860000  | -0.703645000 | 6  | 3.125127000  | -1.453520000 | -0.978124000 |
| 6  | 2.423599000  | 1.635709000  | 1.647752000  | 6  | 2.179745000  | 1.009668000  | -2.357693000 |
| 6  | 2.090473000  | 0.581164000  | 2.523329000  | 6  | 1.108300000  | 1.924381000  | -2.649415000 |
| 6  | 3.520788000  | -0.123147000 | -0.016453000 | 6  | 2.536364000  | 2.168217000  | -0.247969000 |
| 6  | 2.855542000  | -1.098404000 | 0.905916000  | 6  | 1.570981000  | 3.135183000  | -0.562970000 |
| 6  | 2.344668000  | -0.767328000 | 2.224695000  | 6  | 0.790845000  | 2.937901000  | -1.736830000 |
| 6  | 0.243783000  | 2.004137000  | -2.687962000 | 6  | 2.231010000  | -1.934532000 | 1.374286000  |
| 6  | 1.279456000  | 1.008864000  | -2.786153000 | 6  | 2.661383000  | -0.644804000 | 1.869814000  |
| 6  | 0.328768000  | 2.950919000  | -1.675859000 | 6  | 2.340614000  | -2.299098000 | 0.046185000  |
| 6  | 2.317631000  | 0.960012000  | -1.835296000 | 6  | 3.148281000  | 0.310367000  | 0.975419000  |
| 6  | 2.842158000  | -0.286709000 | -1.364367000 | 6  | 2.747139000  | 1.668161000  | 1.100187000  |
| 6  | 0.677781000  | -0.204131000 | -3.236144000 | 6  | 1.702718000  | -0.266034000 | 2.890175000  |
| 6  | 1.145532000  | -1.416568000 | -2.718476000 | 6  | 1.339694000  | 1.094481000  | 3.061482000  |
| 6  | 2.264854000  | -1.454188000 | -1.820743000 | 6  | 1.797883000  | 2.042766000  | 2.088306000  |
| 6  | -2.168796000 | 2.719751000  | -1.340124000 | 6  | 0.186166000  | -3.454931000 | 0.135267000  |
| 6  | -2.173942000 | 1.732419000  | -2.365128000 | 6  | 0.069110000  | -3.109847000 | 1.510606000  |
| 6  | -0.936324000 | 3.566993000  | -1.035371000 | 6  | 1.291141000  | -3.011434000 | -0.601257000 |
| 6  | -1.013479000 | 1.421627000  | -3.136281000 | 6  | 1.061976000  | -2.330016000 | 2.132267000  |
| 6  | -0.745038000 | 0.045782000  | -3.406889000 | 6  | 0.807973000  | -1.343338000 | 3.133915000  |
| 6  | -3.151863000 | 0.715294000  | -2.048595000 | 6  | -1.325637000 | -2.755468000 | 1.777545000  |
| 6  | -2.859113000 | -0.639801000 | -2.326223000 | 6  | -1.660538000 | -1.770682000 | 2.706052000  |
| 6  | -1.654194000 | -0.976326000 | -3.062741000 | 6  | -0.612197000 | -1.097490000 | 3.630401000  |
| 6  | 0.695503000  | -3.165487000 | -1.240819000 | 6  | -0.400818000 | 2.561282000  | 2.506322000  |
| 6  | 0.203728000  | -2.459753000 | -2.371080000 | 6  | -0.057749000 | 1.391606000  | 3.296537000  |
| 6  | -1.173711000 | -2.214806000 | -2.535301000 | 6  | -1.014795000 | 0.398183000  | 3.489371000  |
| 6  | -0.198560000 | -3.530761000 | -0.235235000 | 6  | -1.720341000 | 2.721186000  | 1.991443000  |
| 6  | 1.350315000  | -2.721743000 | 1.515664000  | 6  | -0.731468000 | 3.635176000  | -0.101704000 |
| 6  | 2.301972000  | -2.301089000 | 0.508527000  | 6  | 0.681251000  | 3.782894000  | 0.532838000  |
| 6  | 2.151160000  | -2.716026000 | -0.940413000 | 6  | 0.763327000  | 3.009280000  | 1.843226000  |
| 6  | 0.142516000  | -3.324955000 | 1.174120000  | 6  | -1.832907000 | 3.196668000  | 0.630279000  |
| 6  | -1.026207000 | -2.050306000 | 2.932510000  | 6  | -2.822492000 | 2.192779000  | -1.401037000 |
| 6  | 0.223152000  | -1.450967000 | 3.323339000  | 6  | -1.632894000 | 2.535792000  | -2.102266000 |
| 6  | 1.401423000  | -1.771324000 | 2.601851000  | 6  | -0.602556000 | 3.260063000  | -1.467163000 |
| 6  | -1.064346000 | -2.982714000 | 1.881041000  | 6  | -2.895950000 | 2.454574000  | -0.030301000 |
| 6  | -3.184044000 | -2.040707000 | 1.064474000  | 6  | -3.761982000 | 0.221243000  | 0.410464000  |

|    |              |              |              |   |              |              |              |
|----|--------------|--------------|--------------|---|--------------|--------------|--------------|
| 6  | -3.104592000 | -1.041420000 | 2.098222000  | 6 | -3.759855000 | -0.135125000 | -0.957191000 |
| 6  | -2.082849000 | -1.073653000 | 3.060301000  | 6 | -3.449062000 | 0.914022000  | -2.027847000 |
| 6  | -2.146057000 | -2.945950000 | 0.922611000  | 6 | -3.451415000 | 1.515583000  | 0.913227000  |
| 6  | -2.107128000 | -2.634206000 | -1.505305000 | 6 | -2.300931000 | 0.491188000  | 2.883770000  |
| 6  | -3.195862000 | -1.715693000 | -1.456868000 | 6 | -2.662743000 | -0.816548000 | 2.373662000  |
| 6  | -3.956571000 | -1.470738000 | -0.154375000 | 6 | -3.400430000 | -0.949733000 | 1.186811000  |
| 6  | -1.612692000 | -3.327940000 | -0.386517000 | 6 | -2.649028000 | 1.634033000  | 2.116435000  |
| 7  | -6.414600000 | -2.464065000 | -0.271422000 | 6 | -0.785849000 | -1.553032000 | 5.030155000  |
| 6  | -5.330196000 | -2.022708000 | -0.213221000 | 7 | -0.902724000 | -1.914428000 | 6.141357000  |
| 7  | 5.282783000  | 3.095456000  | 0.435931000  | 6 | -4.657703000 | 1.244584000  | -2.822398000 |
| 6  | 4.462601000  | 2.259356000  | 0.432299000  | 7 | -5.621508000 | 1.499066000  | -3.442321000 |
| 7  | -1.322456000 | 6.068453000  | -1.823345000 | 6 | 1.014676000  | 5.216156000  | 0.724870000  |
| 6  | -1.135602000 | 4.966720000  | -1.469887000 | 7 | 1.262714000  | 6.350771000  | 0.896708000  |
| 7  | 3.739084000  | -4.710967000 | -1.642597000 | 6 | -1.590419000 | -5.033613000 | -0.674671000 |
| 6  | 3.076445000  | -3.797436000 | -1.332503000 | 7 | -1.894770000 | -6.156529000 | -0.831906000 |
| 6  | 5.103181000  | -0.510089000 | -0.000592000 | 6 | 4.261176000  | -2.314178000 | -1.388659000 |
| 8  | 5.709549000  | -0.057027000 | 0.990929000  | 7 | 5.015717000  | -3.168062000 | -1.664992000 |
| 8  | 5.469411000  | -1.243294000 | -0.937582000 | 6 | 5.175845000  | 0.209718000  | -0.720376000 |
|    |              |              |              | 8 | 5.858783000  | 0.629920000  | 0.237268000  |
|    |              |              |              | 8 | 5.515001000  | -0.037656000 | -1.902240000 |
| 6c |              |              |              |   |              |              |              |
| 6  | 1.024973000  | -1.112806000 | 3.098769000  |   |              |              |              |
| 6  | 1.381519000  | -2.221017000 | 2.286310000  |   |              |              |              |
| 6  | -0.293447000 | -0.848492000 | 3.542667000  |   |              |              |              |
| 6  | 0.328927000  | -3.251218000 | 1.873720000  |   |              |              |              |
| 6  | 0.327844000  | -3.449144000 | 0.339722000  |   |              |              |              |
| 6  | 2.425946000  | -1.798878000 | 1.396500000  |   |              |              |              |
| 6  | 2.549615000  | -2.262227000 | 0.075815000  |   |              |              |              |
| 6  | 1.395011000  | -2.940068000 | -0.424632000 |   |              |              |              |
| 6  | 0.149118000  | 1.573199000  | 3.307260000  |   |              |              |              |
| 6  | 1.517062000  | 1.280699000  | 2.984885000  |   |              |              |              |
| 6  | -0.760346000 | 0.514230000  | 3.558336000  |   |              |              |              |
| 6  | 1.959309000  | -0.032329000 | 2.855117000  |   |              |              |              |
| 6  | 2.878282000  | -0.476170000 | 1.819233000  |   |              |              |              |
| 6  | 2.084775000  | 2.406862000  | 2.079020000  |   |              |              |              |
| 6  | 2.819393000  | 1.819089000  | 0.878950000  |   |              |              |              |
| 6  | 3.190935000  | 0.466420000  | 0.835711000  |   |              |              |              |
| 6  | -2.537460000 | 1.640624000  | 2.257980000  |   |              |              |              |
| 6  | -1.608856000 | 2.711497000  | 1.969509000  |   |              |              |              |
| 6  | -2.146082000 | 0.568979000  | 3.135014000  |   |              |              |              |
| 6  | -0.288903000 | 2.659468000  | 2.452307000  |   |              |              |              |
| 6  | 0.790926000  | 3.157901000  | 1.666541000  |   |              |              |              |
| 6  | -1.859039000 | 3.167785000  | 0.624436000  |   |              |              |              |
| 6  | -0.794268000 | 3.659132000  | -0.155310000 |   |              |              |              |
| 6  | 0.532279000  | 3.522915000  | 0.336568000  |   |              |              |              |
| 6  | -3.319528000 | -1.007913000 | 1.587102000  |   |              |              |              |
| 6  | -3.989838000 | 0.145908000  | 0.796681000  |   |              |              |              |
| 6  | -2.478522000 | -0.753993000 | 2.688363000  |   |              |              |              |
| 6  | -3.385843000 | 1.498419000  | 1.143464000  |   |              |              |              |
| 6  | -2.980538000 | 2.426638000  | 0.106125000  |   |              |              |              |
| 6  | -3.684574000 | -0.270362000 | -0.673063000 |   |              |              |              |
| 6  | -3.364143000 | 0.684510000  | -1.664116000 |   |              |              |              |
| 6  | -2.903581000 | 2.004882000  | -1.249269000 |   |              |              |              |

|   |              |              |              |
|---|--------------|--------------|--------------|
| 6 | -1.110073000 | -2.712897000 | 2.106746000  |
| 6 | -1.899129000 | -2.908502000 | 0.934415000  |
| 6 | -1.363047000 | -1.638225000 | 2.957760000  |
| 6 | -2.951328000 | -2.011834000 | 0.655142000  |
| 6 | -3.304484000 | -1.611441000 | -0.697068000 |
| 6 | -1.010413000 | -3.293775000 | -0.155552000 |
| 6 | -1.282557000 | -2.962705000 | -1.482225000 |
| 6 | -2.575990000 | -2.211804000 | -1.897717000 |
| 6 | -1.496156000 | 1.316505000  | -2.935093000 |
| 6 | -2.424788000 | 0.232434000  | -2.671970000 |
| 6 | -2.012734000 | -1.091867000 | -2.818169000 |
| 6 | -0.171022000 | 1.046476000  | -3.341805000 |
| 6 | 0.640213000  | 2.920252000  | -1.922195000 |
| 6 | -0.801845000 | 3.451913000  | -1.690623000 |
| 6 | -1.857135000 | 2.426486000  | -2.118231000 |
| 6 | 0.904421000  | 1.851352000  | -2.781745000 |
| 6 | 2.827387000  | 1.200722000  | -1.384143000 |
| 6 | 2.479715000  | 2.228813000  | -0.459244000 |
| 6 | 1.419424000  | 3.116666000  | -0.752102000 |
| 6 | 2.019371000  | 0.970037000  | -2.485123000 |
| 6 | 2.048539000  | -1.451155000 | -2.079998000 |
| 6 | 3.174582000  | -1.432485000 | -1.056686000 |
| 6 | 3.557364000  | 0.072611000  | -0.622342000 |
| 6 | 1.646363000  | -0.383018000 | -2.871835000 |
| 6 | -0.627553000 | -1.364205000 | -3.080488000 |
| 6 | -0.192870000 | -2.462436000 | -2.266168000 |
| 6 | 1.128387000  | -2.487906000 | -1.770599000 |
| 6 | 0.280391000  | -0.317571000 | -3.354053000 |
| 6 | -3.477131000 | -3.114654000 | -2.661571000 |
| 7 | -4.194516000 | -3.820194000 | -3.270747000 |
| 6 | -5.457050000 | 0.159242000  | 1.023751000  |
| 7 | -6.610444000 | 0.204280000  | 1.252166000  |
| 6 | 2.959705000  | 3.316498000  | 2.865451000  |
| 7 | 3.640049000  | 4.037823000  | 3.497947000  |
| 6 | 5.015249000  | 0.334200000  | -0.697462000 |
| 7 | 6.135911000  | 0.670558000  | -0.602851000 |
| 6 | -1.015846000 | 4.740327000  | -2.395244000 |
| 7 | -1.200787000 | 5.755219000  | -2.960997000 |
| 6 | 0.520662000  | -4.535830000 | 2.597897000  |
| 7 | 0.665867000  | -5.540616000 | 3.191581000  |
| 6 | 4.420641000  | -2.127338000 | -1.835092000 |
| 8 | 4.681953000  | -3.320611000 | -1.560392000 |
| 8 | 4.957319000  | -1.385142000 | -2.698075000 |
